# Supplementary material for: Catalytic asymmetric Friedländer condensation to construct cyclobutanone-fused quinolines with a quaternary stereogenic centre
Source: Royal Society of Chemistry journal article supplement (doi:10.1039/d4qo01177e), 2024-01-01
Supplement: d4qo01177e1.pdf [file d4qo01177e1.pdf]

Supporting Information for

**Catalytic Asymmetric Friedländer Condensation to Construct Cyclobutanone-  
Fused Quinolines with Quaternary Stereogenic Centre**

Li-E Wang, Si Zhang, Ruo-Shi Jin, Yi-Yuan Peng, Qiu-Ping Ding and Xing-Ping Zeng\*

*Key Laboratory for Green Chemistry of Jiangxi Province, Jiangxi Normal University, 99 Ziyang Avenue,*

*Nanchang 330022, Jiangxi, China;*

*E-mail for X.-P. Zeng: 005173@jxnu.edu.cn*

---

| Contents                                                               | Page   |
|------------------------------------------------------------------------|--------|
| 1. General Methods.                                                    | S2     |
| 2. Preparation of 2-aminobenzophenones                                 | S3-5   |
| 3. General procedure for catalytic asymmetric Friedländer condensation | S6-13  |
| 4. General procedure for the reduction of <b>4I</b> to <b>5</b>        | S14-15 |
| 5. Crystallographic information of <b>4a</b>                           | S16-17 |
| 6. NMR spectra of <b>1</b> , <b>4</b> and <b>5</b>                     | S18-77 |
| 7. HPLC chromatograms of <b>5</b> , <b>6</b>                           | S78-97 |

---

## 1. General Methods.

Reactions were monitored by thin layer chromatography using UV light or KMnO<sub>4</sub> to visualize the course of reaction. Purification of reaction products was carried out by flash chromatography on silica gel. Chemical yields refer to pure isolated substances. The [ $\alpha$ ]<sup>D</sup> was recorded using PolAAr 3005 High Accuracy Polarimeter. <sup>1</sup>H, <sup>13</sup>C and <sup>19</sup>F NMR spectra were obtained using Bruker DPX-400 spectrometer. The ee values were determined by chiral HPLC analysis using Agilent Technologies 1260 Infinity series; Structural assignments were made with additional information from NOESY {<sup>1</sup>H} NMR experiments. The HRMS spectra were measured on Bruker maXis impact spectrometer using electron spray ionization (ESI) method. Chemical shifts were reported in ppm from tetramethyl silane with the solvent resonance as the internal standard. The following abbreviations were used to designate chemical shift multiplicities: s = singlet, d = doublet, t = triplet, q = quartet, h = heptet, m = multiplet, br = broad.

The chiral phosphoric acid catalysts **3a-3k** were prepared according to the known methods and the characterization data were in consistent with the reported data. <sup>[1]</sup> All the cyclobutane-1,3-diones were known and could be prepared according to methods reported by Brand et al and our group. <sup>[2]</sup>

---

[1] (a) T. Akiyama, H. Morita, J. Itoh, K. Fuchibe, *Org. Lett.*, 2005, **7**, 2583; (b) M. Hatano, T. Ikeno, T. Matsumura, S. Torii, K. Ishihara, *Adv. Synth. Catal.*, 2008, **350**, 1776; (c) F. Romanov-Michailidis, L. Guenee, A. Alexakis, *Org. Lett.*, 2013, **15**, 5890; (d) F. Romanov-Michailidis, L. Guenee, A. Alexakis, *Angew. Chem. Int. Ed.*, 2013, **52**, 9266; (e) W. W. Zi, Y. M. Wang, F. D. Toste, *J. Am. Chem. Soc.*, 2014, **136**, 12864.

[2] (a) S. Brand, B. C. de Candole, J. A. Brown, *Org. Lett.*, 2003, **5**, 2343; (b) K. G. Wen, C. Liu, D. H. Wei, Y. F. Niu, Y. Y. Peng, X. P. Zeng, *Org. Lett.*, 2021, **23**, 1118; (c) S. Zhang, R.-S. Jin, Y.-F. Niu and X.-P. Zeng, *J. Org. Chem.*, 2023, **88**, 4627; (d) C. Liu, F.-L. Zou, K.-G. Wen, Y.-Y. Peng, Q.-P. Ding and X.-P. Zeng, *Org. Lett.*, 2023, **25**, 5719.

## 2. Preparation of 2-aminobenzophenones

2-Aminobenzophenone **1a-li** were prepared according to reported methods. [3]

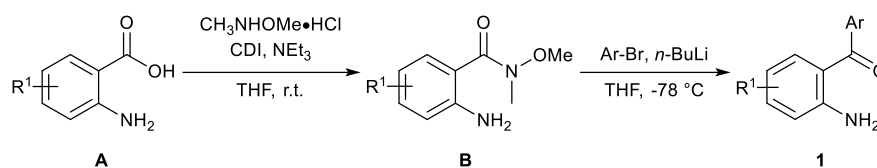

### General procedure:

**Step 1:** To a stirred solution of 2-aminobenzoic acid **A** (10.0 mmol) in anhydrous THF (80 mL) was added CDI (1.60 g, 10.0 mmol) at 0 °C under N<sub>2</sub> atmosphere. The reaction mixture was allowed to warm to r.t. and stirred for 2 h, then a suspension of *N,O*-dimethylhydroxylamine hydrochloride (0.97 g, 10.0 mmol) and Et<sub>3</sub>N (1.01 g, 1.39 mL, 10.0 mmol) in THF (20 mL) was added. The reaction mixture was stirred until completion indicated by TLC analysis, the volatile solvent was removed under reduced pressure. The residue was poured into water (50 mL), adjusted to neutral with 5% NaOH solution and extracted with EtOAc (3 × 50 mL). The combined organic layers were dried over anhydrous Na<sub>2</sub>SO<sub>4</sub>, filtered, concentrated under vacuo and purified by flash column chromatography (PE/EtOAc = 10:1) to yield Weinreb amide **B**.

**Step 2:** Weinreb amide **B** (5.0 mmol) and Ar-Br (5.0 mmol) were dissolved in anhydrous THF (30 mL). The solution was cooled to -78 °C and *n*-BuLi (4.0 mL, 2.5 M in hexane, 10.0 mmol) was added dropwise with stirring over 1 h. After the addition completion, 1 N HCl (10 mL) was added. The mixture was extracted with EtOAc (3 × 20 mL). The combined organic layers were dried over anhydrous Na<sub>2</sub>SO<sub>4</sub>, filtered, and concentrated in vacuo. The residue was purified by flash column chromatography (PE/EtOAc = 15:1) to yield the desired 2-aminoaryl ketones **1**.

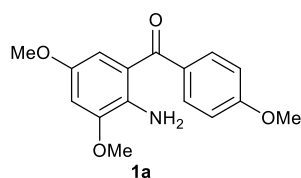

Column chromatography afforded **1a** in 40% yield (574 mg) as a

yellow solid. <sup>1</sup>H NMR (600 MHz, Chloroform-d) δ 7.72 (d, J = 8.5 Hz, 2H), 6.94 (d, J = 8.5 Hz, 2H), 6.60 (d, J = 2.7 Hz, 1H), 6.56 (d, J = 2.6

Hz, 1H), 5.76 (s, 2H), 3.88 (d, J = 4.6 Hz, 6H), 3.66 (s, 3H); <sup>13</sup>C NMR

(101 MHz, Chloroform-d) δ 197.22, 162.36, 149.18, 148.47, 136.05, 132.35, 131.76, 117.96, 113.35,

[3] a) C.-T. Wang, P.-Y. Liang, M. Li, B. Wang, Y.-Z. Wang, X.-S. Li, W.-X. Wei, X.-Y. Gou, Y.-N. Ding, Z. Zhang, Y.-K. Li, X.-Y. Liu and Y.-M. Liang, *Angew. Chem. Int. Ed.*, 2023, **62**, e202304447; b) J. Liu, Q. Li, Y. Wei and M. Shi, *Org. Lett.*, 2020, **22**, 2494; c) Y.-D. Shao, M.-M. Dong, Y.-A. Wang, P.-M. Cheng, T. Wang and D.-J. Cheng, *Org. Lett.*, 2019, **21**, 4831;

106.37, 103.74, 55.87, 55.44; HRMS (ESI) m/z:  $[M+Na]^+$  Calcd for  $C_{16}H_{17}NNaO_4$  310.1050; Found: 310.1051.

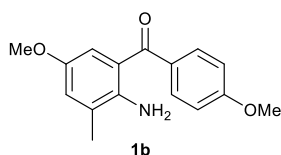

Column chromatography afforded **1b** in 50% yield (677 mg) as a yellow solid.  $^1H$  NMR (600 MHz, Chloroform-d)  $\delta$  7.71 (d,  $J = 8.4$  Hz, 2H), 6.94 (d,  $J = 8.9$  Hz, 2H), 6.91 (d,  $J = 3.0$  Hz, 1H), 6.86 (d,  $J = 2.9$  Hz, 1H), 5.52 (s, 2H), 3.87 (s, 3H), 3.66 (s, 3H), 2.21 (s, 3H).  $^{13}C$  NMR (101 MHz, Chloroform-d)  $\delta$  197.69, 162.42, 149.27, 143.08, 132.41, 131.86, 125.23, 122.97, 118.92, 114.77, 113.37, 55.92, 55.45, 17.69; HRMS (ESI) m/z:  $[M+Na]^+$  Calcd for  $C_{16}H_{17}NNaO_3$  294.1101; Found: 294.1104.

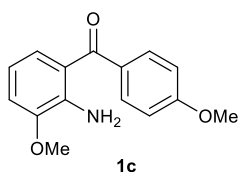

Column chromatography afforded **1c** in 53% yield (681 mg) as an orange solid.  $^1H$  NMR (400 MHz, Chloroform-d)  $\delta$  7.68f (t, 2H), 7.09 (dd,  $J = 8.2$ , 1.3 Hz, 1H), 6.95 – 6.93 (m, 2H), 6.87 (dd,  $J = 7.9$ , 1.3 Hz, 1H), 6.56 (t,  $J = 8.0$  Hz, 1H), 3.88 (d,  $J = 11.6$  Hz, 6H);  $^{13}C$  NMR (101 MHz, Chloroform-d)  $\delta$  197.69, 162.24, 147.36, 141.45, 132.58, 131.72, 125.55, 118.38, 113.97, 113.30, 112.70, 55.80, 55.44; HRMS (ESI) m/z:  $[M+Na]^+$  Calcd for  $C_{15}H_{15}NNaO_3$  280.0944; Found: 280.0948.

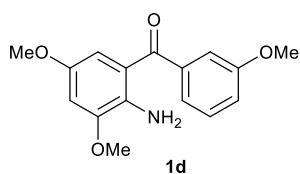

Column chromatography afforded **1d** in 52% yield (746 mg) as a yellow solid.  $^1H$  NMR (600 MHz, Chloroform-d)  $\delta$  7.35 (t,  $J = 7.8$  Hz, 1H), 7.23 – 7.21 (m, 2H), 7.07 – 7.05 (m, 1H), 6.61 (d,  $J = 2.6$  Hz, 1H), 6.55 (d,  $J = 2.7$  Hz, 1H), 6.06 (s, 2H), 3.89 (s, 3H), 3.84 (s, 3H), 3.64 (s, 3H);  $^{13}C$  NMR (101 MHz, Chloroform-d)  $\delta$  198.21, 159.39, 148.95, 148.37, 141.48, 137.06, 129.00, 121.68, 117.46, 116.71, 113.66, 106.33, 104.38, 55.89, 55.84, 55.43; HRMS (ESI) m/z:  $[M+Na]^+$  Calcd for  $C_{16}H_{17}NNaO_4$  310.1050; Found: 310.1049.

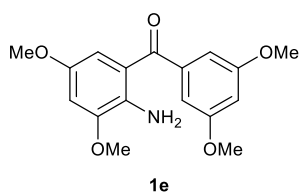

Column chromatography afforded **1e** in 45% yield 713 mg) as a yellow solid.  $^1H$  NMR (600 MHz, Chloroform-d)  $\delta$  6.80 (d,  $J = 2.3$  Hz, 2H), 6.61 – 6.58 (m, 3H), 6.06 (s, 2H), 3.89 (s, 3H), 3.81 (d,  $J = 1.0$  Hz, 6H), 3.65 (s, 3H);  $^{13}C$  NMR (101 MHz, Chloroform-d)  $\delta$  198.03, 160.41, 148.95, 148.36, 142.10, 137.12, 116.53, 106.84, 106.23, 104.48, 103.61, 55.89, 55.87, 55.57; HRMS (ESI) m/z:  $[M+Na]^+$  Calcd for  $C_{17}H_{19}NNaO_5$  340.1155; Found: 340.1160.

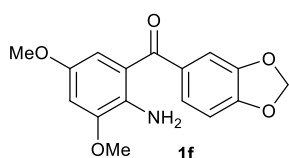

Column chromatography afforded **1f** in 48% yield (722 mg) as an orange solid.  $^1\text{H}$  NMR (400 MHz, Chloroform- $d$ )  $\delta$  7.29 – 7.24 (m, 2H), 6.85 (d,  $J$  = 8.1 Hz, 1H), 6.57 (dd,  $J$  = 19.2, 2.7 Hz, 2H), 6.05 (s, 2H), 3.88 (s, 3H), 3.68 (s, 3H);  $^{13}\text{C}$  NMR (101 MHz, Chloroform- $d$ )  $\delta$  196.70, 150.53, 149.21, 148.47, 147.64, 136.07, 134.03, 125.41, 117.77, 109.69, 107.60, 106.30, 103.85, 101.65, 55.91, 55.88; HRMS (ESI)  $m/z$ :  $[\text{M}+\text{Na}]^+$  Calcd for  $\text{C}_{16}\text{H}_{15}\text{NNaO}_5$  324.0842; Found: 324.0845.

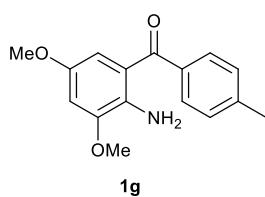

Column chromatography afforded **1g** in 41% yield (555 mg) as an orange solid.  $^1\text{H}$  NMR (400 MHz, Chloroform- $d$ )  $\delta$  7.61 – 7.59 (m, 2H), 7.25 (d,  $J$  = 8.0 Hz, 2H), 6.58 (dd,  $J$  = 19.7, 2.6 Hz, 2H), 5.86 (s, 2H), 3.88 (s, 3H), 3.64 (s, 3H), 2.42 (s, 3H);  $^{13}\text{C}$  NMR (101 MHz, Chloroform- $d$ )  $\delta$  198.27, 149.02, 148.41, 141.75, 137.28, 136.61, 129.46, 128.74, 117.31, 106.44, 104.06, 55.88, 55.85, 21.57; HRMS (ESI)  $m/z$ :  $[\text{M}+\text{Na}]^+$  Calcd for  $\text{C}_{16}\text{H}_{17}\text{NNaO}_3$  294.1101; Found: 294.1104.

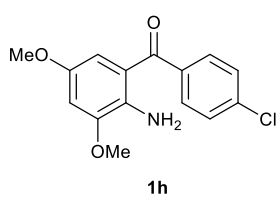

Column chromatography afforded **1h** in 40% yield (582 mg) as an orange solid.  $^1\text{H}$  NMR (600 MHz, Chloroform- $d$ )  $\delta$  7.62 (d,  $J$  = 8.4 Hz, 2H), 7.43 (d,  $J$  = 8.5 Hz, 2H), 6.61 (d,  $J$  = 2.6 Hz, 1H), 6.46 (d,  $J$  = 2.6 Hz, 1H), 3.89 (s, 3H), 3.64 (s, 3H);  $^{13}\text{C}$  NMR (101 MHz, Chloroform- $d$ )  $\delta$  197.07, 149.04, 148.47, 138.49, 137.34, 137.17, 130.59, 128.37, 116.35, 105.89, 104.47, 55.91, 55.83; HRMS (ESI)  $m/z$ :  $[\text{M}+\text{Na}]^+$  Calcd for  $\text{C}_{15}\text{H}_{14}\text{ClNNaO}_3$  314.0554; Found: 314.0550.

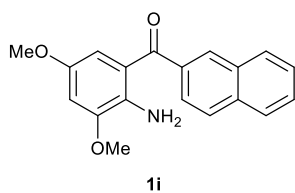

Column chromatography afforded **1i** in 39% yield (599 mg) as a yellow solid.  $^1\text{H}$  NMR (400 MHz, Chloroform- $d$ )  $\delta$  8.17 (d, 1H), 7.93 – 7.89 (m, 3H), 7.80 (dd,  $J$  = 8.5, 1.7 Hz, 1H), 7.59 – 7.54 (m, 2H), 6.64 – 6.59 (m, 2H), 6.06 (s, 2H), 3.91 (s, 3H), 3.60 (d,  $J$  = 1.2 Hz, 3H);  $^{13}\text{C}$  NMR (101 MHz, Chloroform- $d$ )  $\delta$  198.38, 149.04, 148.47, 137.41, 137.07, 134.61, 132.40, 130.08, 129.13, 127.91, 127.80, 127.73, 126.68, 125.78, 117.05, 106.34, 104.34, 55.92, 55.84; HRMS (ESI)  $m/z$ :  $[\text{M}+\text{Na}]^+$  Calcd for  $\text{C}_{19}\text{H}_{17}\text{NNaO}_3$  330.1101; Found: 330.1099.

### 3. General procedure for catalytic asymmetric Friedländer condensation

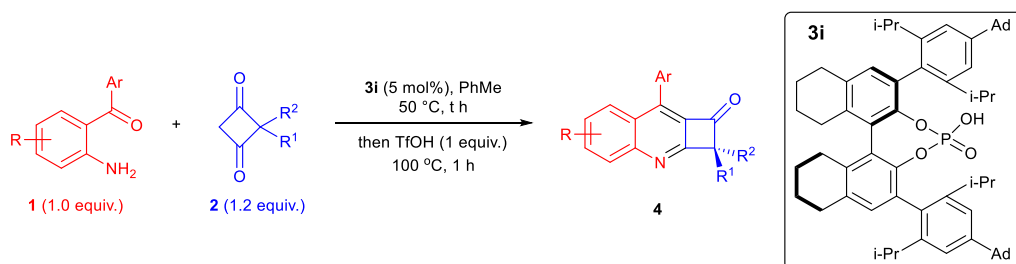

5Å MS (150 mg) was flame dried under vacuum in a 25 mL Schlenk tube. After cooling to room temperature, 2-aminobenzophenone **1** (0.25 mmol), cyclobutane-1,3-diones **2** (1.2 equiv., 0.30 mmol), **3i** (5 mol%, 0.0125 mmol, 11.8 mg), magnetic stir-ring bar and toluene (2.0 mL) were sequentially added under N<sub>2</sub> atmosphere. The resulting mixture was stirred at 50 °C until TLC analysis show the full consumption of 2-aminobenzophenone **1**. In the following, TfOH (0.25 mmol, 18 μL) was added and the resulting mixture was heated to 100 °C with oil bath for 1.0 h. After cooling to room temperature, 0.5 mmol K<sub>2</sub>CO<sub>3</sub> and 100 μl H<sub>2</sub>O were added and stirred for 0.5h, then silica gel column chromatography was performed directly to obtain product **4**.

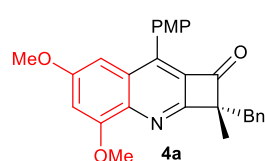

Column chromatography using DCM/EtOAc (50/1-40/1) as the eluent afforded **4a** in 92% yield (101.1 mg) as a light-yellow oil. HPLC analysis (Chiralcel AD-H, <sup>i</sup>PrOH/hexane = 20/80, 1.0 mL/min, 205 nm; t<sub>r</sub> (major) = 15.11 min, t<sub>r</sub> (minor) = 13.22 min) gave the isomeric composition of the product: 93% ee; [α]<sub>D</sub><sup>15.2</sup> = +59.9 (c = 0.90 in CHCl<sub>3</sub>); <sup>1</sup>H NMR (600 MHz, Chloroform-d) δ 7.49 (d, J = 8.7 Hz, 2H), 7.16 (d, J = 7.4 Hz, 2H), 7.11 (t, J = 7.4 Hz, 2H), 7.06 – 7.03 (m, 4H), 6.88 (d, J = 2.5 Hz, 1H), 4.12 (s, 3H), 3.88 (s, 3H), 3.80 (s, 3H), 3.41 (d, J = 13.9 Hz, 1H), 3.27 (d, J = 13.9 Hz, 1H), 1.65 (s, 3H); <sup>13</sup>C NMR (101 MHz, Chloroform-d) δ 195.60, 171.17, 160.98, 157.78, 156.58, 141.76, 141.72, 137.31, 135.71, 131.66, 130.09, 129.05, 127.92, 126.24, 125.57, 114.35, 103.66, 97.82, 73.14, 56.54, 55.46, 55.40, 41.86, 20.01; HRMS (ESI) m/z: [M+Na]<sup>+</sup> Calcd for C<sub>28</sub>H<sub>25</sub>NNaO<sub>4</sub> 462.1676; Found: 462.1679.

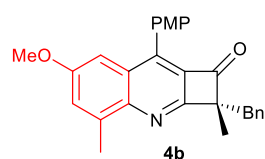

Column chromatography using DCM/EtOAc (50/1-40/1) as the eluent afforded **4b** in 92% yield (97.5 mg) as a light-yellow oil. HPLC analysis (Chiralcel OD-3, <sup>i</sup>PrOH/hexane = 5/95, 1.0 mL/min, 205 nm; t<sub>r</sub> (major) = 6.76 min, t<sub>r</sub> (minor) = 5.84 min) gave the isomeric composition of the product: 92% ee; [α]<sub>D</sub><sup>15.4</sup> =

+55.5 (c = 0.98 in CHCl<sub>3</sub>); <sup>1</sup>H NMR (600 MHz, Chloroform-d) δ 7.56–7.54 (m, 2H), 7.36–7.34 (m, 2H), 7.26–7.25 (m, 2H), 7.17–7.14 (m, 2H), 7.12–7.09 (m, 1H), 7.07–7.05 (m, 2H), 3.89 (s, 3H), 3.80 (s, 3H), 3.28 (dd, J = 2.1 Hz, 2H), 2.86 (s, 3H), 1.59 (s, 3H); <sup>13</sup>C NMR (101 MHz, Chloroform-d) δ 195.82, 171.22, 160.93, 156.95, 139.44, 137.37, 134.55, 131.76, 130.15, 128.34, 127.92, 126.28, 125.80, 124.22, 114.37, 104.19, 72.54, 55.41, 55.34, 41.69, 19.85, 19.17; HRMS (ESI) m/z: [M+Na]<sup>+</sup> Calcd for C<sub>28</sub>H<sub>25</sub>NNaO<sub>3</sub> 462.1727; Found: 462.1727.

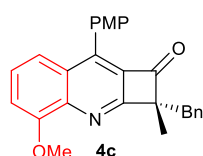

Column chromatography using DCM/EtOAc (50/1-40/1) as the eluent afforded **4c** in 96% yield (97.8 mg) as a yellow solid. HPLC analysis (Chiralcel AD-H, <sup>1</sup>PrOH/hexane = 20/80, 1.0 mL/min, 205 nm; t<sub>r</sub> (major) = 11.90 min, t<sub>r</sub> (minor) = 10.03 min) gave the isomeric composition of the product: 89% ee; [α]<sub>D</sub><sup>15.4</sup> = +54.7 (c = 0.75 in CHCl<sub>3</sub>); m.p. 134.5-136.4 °C; <sup>1</sup>H NMR (400 MHz, Chloroform-d) δ 7.76–7.74 (m, 1H), 7.49 (d, J = 8.7 Hz, 2H), 7.41 (t, J = 8.2 Hz, 1H), 7.23–7.21 (m, 1H), 7.19–7.16 (m, 2H), 7.13–7.03 (m, 5H), 4.15 (s, 3H), 3.88 (s, 3H), 3.43 (d, J = 13.8 Hz, 1H), 3.29 (d, J = 13.9 Hz, 1H), 1.67 (s, 3H); <sup>13</sup>C NMR (101 MHz, Chloroform-d) δ 195.58, 173.24, 161.22, 155.77, 145.00, 143.45, 137.18, 135.29, 132.21, 130.08, 128.32, 127.95, 126.30, 126.02, 125.26, 120.26, 114.30, 110.56, 73.47, 56.50, 55.42, 41.80, 19.94; HRMS (ESI) m/z: [M+Na]<sup>+</sup> Calcd for C<sub>27</sub>H<sub>23</sub>NNaO<sub>3</sub> 432.1570; Found: 432.1560.

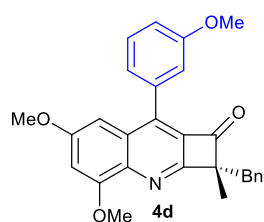

Column chromatography using DCM/EtOAc (50/1-40/1) as the eluent afforded **4d** in 92% yield (101.3 mg) as a yellow solid. HPLC analysis (Chiralcel AD-H, <sup>1</sup>PrOH/hexane = 20/80, 1.0 mL/min, 205 nm; t<sub>r</sub> (major) = 8.63 min, t<sub>r</sub> (minor) = 7.05 min) gave the isomeric composition of the product: 91% ee; [α]<sub>D</sub><sup>15.5</sup> = +111.0 (c = 0.98 in CHCl<sub>3</sub>); m.p. 66.7-68.2 °C; <sup>1</sup>H NMR (600 MHz, Chloroform-d) δ 7.30 (t, J = 7.9 Hz, 1H), 7.04 (d, J = 6.9 Hz, 2H), 7.00–6.94 (m, 6H), 6.86 (t, J = 2.0 Hz, 1H), 6.78 (d, J = 2.6 Hz, 1H), 4.01 (s, 3H), 3.73 (s, 3H), 3.66 (s, 3H), 3.31 (d, J = 13.9 Hz, 1H), 3.17 (d, J = 13.9 Hz, 1H), 1.57 (s, 3H); <sup>13</sup>C NMR (101 MHz, Chloroform-d) δ 195.29, 170.95, 159.80, 157.90, 156.55, 141.49, 137.25, 136.22, 134.45, 130.08, 129.76, 129.09, 127.90, 126.26, 122.09, 116.03, 114.99, 103.83, 97.66, 73.50, 56.54, 55.45, 55.42, 41.92, 20.01; HRMS (ESI) m/z: [M+Na]<sup>+</sup> Calcd for C<sub>28</sub>H<sub>25</sub>NNaO<sub>4</sub> 462.1676; Found: 462.1674.

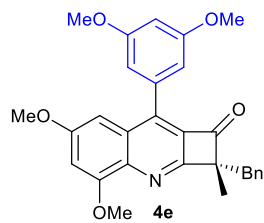

Column chromatography using DCM/EtOAc (50/1-40/1) as the eluent afforded **4e** in 91% yield (105.7 mg) as a yellow solid. HPLC analysis (Chiralcel AD-H, *i*PrOH/hexane = 15/85, 1.0 mL/min, 205 nm;  $t_r$  (major) = 10.20 min,  $t_r$  (minor) = 8.92 min) gave the isomeric composition of the product: 89% ee;  $[\alpha]_D^{15.5} = +86.9$  ( $c = 0.51$  in  $\text{CHCl}_3$ ); m.p. 61.3-62.7 °C;  $^1\text{H NMR}$  (600 MHz, Chloroform- $d$ )  $\delta$  7.13 (d,  $J = 8.0$  Hz, 2H), 7.10 – 7.04 (m, 4H), 6.89 (t,  $J = 2.0$  Hz, 1H), 6.58– 6.57 (m, 3H), 4.13 (d,  $J = 1.6$  Hz, 3H), 3.82 – 3.80 (m, 9H), 3.41 (d,  $J = 13.9$  Hz, 1H), 3.27 (d,  $J = 13.9$  Hz, 1H), 1.67 (d,  $J = 1.5$  Hz, 3H);  $^{13}\text{C NMR}$  (101 MHz, Chloroform- $d$ )  $\delta$  195.18, 170.92, 160.91, 157.88, 156.56, 137.27, 136.25, 134.90, 130.10, 129.08, 127.87, 126.24, 107.80, 103.87, 102.34, 97.71, 73.57, 56.57, 55.58, 55.53, 41.96, 19.97; HRMS (ESI)  $m/z$ :  $[\text{M}+\text{Na}]^+$  Calcd for  $\text{C}_{29}\text{H}_{27}\text{NNaO}_5$  492.1781; Found: 492.1784.

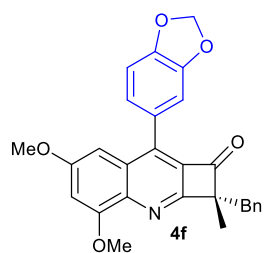

Column chromatography using DCM/EtOAc (50/1-40/1) as the eluent afforded **4f** in 88% yield (116.1 mg) as a yellow solid. HPLC analysis (Chiralcel OD-3, *i*PrOH/hexane = 20/80, 0.5 mL/min, 205 nm;  $t_r$  (major) = 13.18 min,  $t_r$  (minor) = 11.79 min) gave the isomeric composition of the product: 89% ee;  $[\alpha]_D^{15.4} = +51.0$  ( $c = 0.92$  in  $\text{CHCl}_3$ ); m.p. 67.7-68.9 °C;  $^1\text{H NMR}$  (400 MHz, Chloroform- $d$ )  $\delta$  7.26 (s, 1H), 7.16 – 7.03 (m, 6H), 7.01 – 6.93 (m, 2H), 6.88 (d,  $J = 2.5$  Hz, 1H), 6.06 (t, 2H), 4.13 (s, 3H), 3.81 (s, 3H), 3.41 (d,  $J = 13.8$  Hz, 1H), 3.27 (d,  $J = 13.8$  Hz, 1H), 1.66 (s, 3H);  $^{13}\text{C NMR}$  (101 MHz, Chloroform- $d$ )  $\delta$  195.38, 171.03, 157.84, 156.59, 149.13, 148.16, 141.42, 137.26, 135.89, 130.07, 129.09, 129.03, 128.22, 127.92, 126.95, 126.25, 124.60, 110.14, 108.78, 103.72, 101.62, 97.71, 73.31, 56.55, 55.49, 41.88, 20.01; HRMS (ESI)  $m/z$ :  $[\text{M}+\text{Na}]^+$  Calcd for  $\text{C}_{28}\text{H}_{23}\text{NNaO}_5$  476.1468; Found: 476.1466.

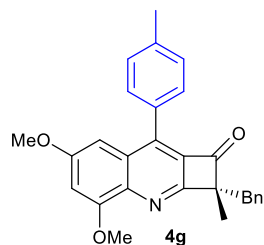

Column chromatography using DCM/EtOAc (50/1-40/1) as the eluent afforded **4g** in 85% yield (89.9 mg) as a yellow solid. HPLC analysis (Chiralcel AD-H, *i*PrOH/hexane = 15/85, 0.75 mL/min, 250 nm;  $t_r$  (major) = 10.32 min,  $t_r$  (minor) = 9.45 min) gave the isomeric composition of the product: 94% ee;  $[\alpha]_D^{15.4} = +100.4$  ( $c = 0.82$  in  $\text{CHCl}_3$ ); m.p. 61.4-62.9 °C;  $^1\text{H NMR}$  (400 MHz, Chloroform- $d$ )  $\delta$  7.39 (d,  $J = 7.9$  Hz, 2H), 7.31 (d,  $J = 7.9$  Hz, 2H), 7.17– 7.14 (m, 2H), 7.12 – 7.03 (m, 4H), 6.88 (d,  $J = 2.5$  Hz, 1H), 4.12 (s, 3H), 3.77 (s, 3H), 3.41 (d,  $J = 13.8$



Hz, 1H), 3.27 (d, J = 13.8 Hz, 1H), 2.43 (s, 3H), 1.66 (s, 3H); <sup>13</sup>C NMR (101 MHz, Chloroform-d) δ 195.50, 171.12, 157.81, 156.54, 142.00, 141.68, 140.11, 137.28, 136.04, 130.36, 130.09, 129.90, 129.57, 129.14, 127.92, 126.24, 103.74, 97.75, 73.32, 56.55, 55.45, 41.87, 21.48, 20.03; RMS (ESI) m/z: [M+Na]<sup>+</sup> Calcd for C<sub>28</sub>H<sub>25</sub>NNaO<sub>3</sub> 446.1727; Found: 446.1727.

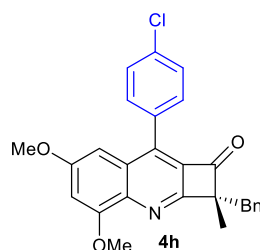

Column chromatography using DCM/EtOAc (50/1-40/1) as the eluent afforded **4h** in 90% yield (100.2mg) as a yellow solid. HPLC analysis (Chiralcel AD-H, iPrOH/hexane = 20/80, 1.0 mL/min, 205 nm; tr (major) = 9.32 min, tr (minor) = 8.48 min) gave the isomeric composition of the product: 88% ee; [α]<sub>D</sub><sup>15.4</sup> = +76.7 (c = 0.78 in CHCl<sub>3</sub>); m.p. 61.3-64.3 °C;

<sup>1</sup>H NMR (400 MHz, Chloroform-d) δ 7.49 (d, J = 8.3 Hz, 2H), 7.39 (d, J = 8.3 Hz, 2H), 7.14 – 7.04 (m, 5H), 6.90 (s, 2H), 4.13 (s, 3H), 3.79 (s, 3H), 3.40 (d, J = 13.8 Hz, 1H), 3.27 (d, J = 13.8 Hz, 1H), 1.67 (s, 3H); <sup>13</sup>C NMR (101 MHz, Chloroform-d) δ 196.32, 171.77, 161.14, 157.93, 156.63, 142.03, 141.80, 141.74, 135.69, 131.92, 129.15, 129.03, 128.29, 128.25, 125.79, 125.66, 125.30, 114.46, 103.73, 97.98, 72.11, 56.52, 55.52, 55.44, 37.13, 32.17, 20.38; HRMS (ESI) m/z: [M+Na]<sup>+</sup> Calcd for C<sub>27</sub>H<sub>22</sub>CINNaO<sub>3</sub> 466.1180; Found: 466.1184.

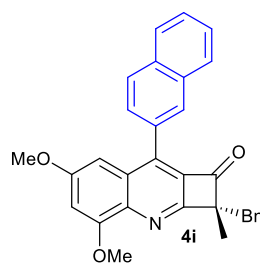

Column chromatography using DCM/EtOAc (50/1-40/1) as the eluent afforded **4i** in 89% yield (101.5 mg) as a yellow solid. HPLC analysis (Chiralcel AD-H, iPrOH/hexane = 20/80, 1.0 mL/min, 205 nm; t<sub>r</sub> (major) = 13.82 min, t<sub>r</sub> (minor) = 11.86 min) gave the isomeric composition of the product: 89% ee; [α]<sub>D</sub><sup>15.5</sup> = +70.0 (c = 1.08 in CHCl<sub>3</sub>); m.p. 91.2-93.6 °C;

<sup>1</sup>H NMR (600 MHz, Chloroform-d) δ 7.97– 7.94 (m, 2H), 7.89 (d, J = 7.9 Hz, 2H), 7.56 – 7.54 (m, 3H), 7.18 – 7.16 (m, 2H), 7.12 (t, J = 7.5 Hz, 2H), 7.07 – 7.05 (m, 2H), 6.90 (d, J = 2.5 Hz, 1H), 4.13 (s, 3H), 3.73 (s, 3H), 3.43 (d, J = 13.9 Hz, 1H), 3.30 (d, J = 13.9 Hz, 1H), 1.69 (s, 3H); <sup>13</sup>C NMR (101 MHz, Chloroform-d) δ 195.36, 171.09, 158.02, 156.63, 141.72, 137.28, 136.46, 133.70, 133.15, 130.76, 130.14, 130.02, 129.31, 128.67, 128.52, 127.97, 127.82, 127.38, 126.85, 126.77, 126.30, 103.85, 97.69, 73.53, 56.59, 55.48, 41.95, 20.06; HRMS (ESI) m/z: [M+Na]<sup>+</sup> Calcd for C<sub>31</sub>H<sub>25</sub>NNaO<sub>3</sub> 482.1727; Found: 482.1727.

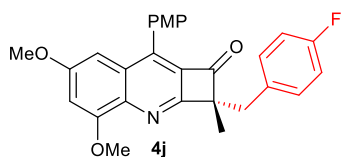

Column chromatography using DCM/EtOAc (50/1-40/1) as the eluent afforded **4j** in 98% yield (111.5 mg) as a yellow solid. HPLC analysis (Chiralcel AD-H, <sup>i</sup>PrOH/hexane = 15/85, 1.0 mL/min, 205

nm;  $t_r$  (major) = 13.28 min,  $t_r$  (minor) = 10.86 min) gave the isomeric composition of the product: 87% ee;  $[\alpha]_D^{15.4} = +55.5$  ( $c = 0.97$  in  $\text{CHCl}_3$ ); m.p. 150.1-152.7 °C; <sup>1</sup>H NMR (400 MHz, Chloroform-d)  $\delta$  7.50 (d,  $J = 8.8$  Hz, 2H), 7.12 – 7.07 (m, 2H), 7.07 – 7.04 (m, 3H), 6.89 (d,  $J = 2.5$  Hz, 1H), 6.78 (t,  $J = 8.7$  Hz, 2H), 4.13 (s, 3H), 3.89 (s, 3H), 3.81 (s, 3H), 3.37 (d,  $J = 14.0$  Hz, 1H), 3.24 (d,  $J = 14.0$  Hz, 1H), 1.64 (s, 3H); <sup>13</sup>C NMR (101 MHz, Chloroform-d)  $\delta$  195.46, 170.91, 162.73, 161.06, 160.31, 157.87, 156.56, 135.65, 133.02, 131.66, 131.55, 131.47, 129.07, 125.50, 114.79, 114.58, 114.39, 103.78, 97.90, 73.10, 56.54, 55.47, 55.40, 40.91, 20.03; HRMS (ESI)  $m/z$ :  $[\text{M}+\text{Na}]^+$  Calcd for  $\text{C}_{28}\text{H}_{24}\text{FNNaO}_4$  480.1582; Found: 480.1581.

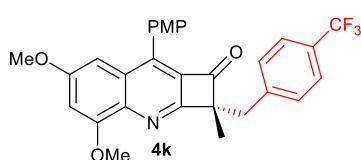

Column chromatography using DCM/EtOAc (50/1-40/1) as the eluent afforded **4k** in 88% yield (111.9 mg) as a yellow solid. HPLC analysis (Chiralcel AD-H, <sup>i</sup>PrOH/hexane = 20/80, 1.0

mL/min, 205 nm;  $t_r$  (major) = 16.41 min,  $t_r$  (minor) = 14.73 min) gave the isomeric composition of the product: 93% ee;  $[\alpha]_D^{15.3} = +35.8$  ( $c = 1.05$  in  $\text{CHCl}_3$ ); m.p. 69.3-72.1 °C; <sup>1</sup>H NMR (400 MHz, Chloroform-d)  $\delta$  7.51 – 7.49 (m, 2H), 7.38 (d,  $J = 8.0$  Hz, 2H), 7.29 (d,  $J = 2.0$  Hz, 2H), 7.07 – 7.04 (m, 3H), 6.90 (d,  $J = 2.5$  Hz, 1H), 4.12 (s, 3H), 3.88 (s, 3H), 3.80 (s, 3H), 3.45 (d,  $J = 13.8$  Hz, 1H), 3.32 (d,  $J = 13.8$  Hz, 1H), 1.66 (s, 3H); <sup>13</sup>C NMR (101 MHz, Chloroform-d)  $\delta$  194.94, 170.59, 161.09, 157.95, 156.54, 142.24, 141.72, 141.48, 135.43, 131.62, 130.38, 129.13, 129.01, 128.20, 125.38, 124.86, 124.82, 124.78, 122.89, 114.38, 103.89, 97.86, 77.31, 72.61, 56.52, 55.43, 55.35, 41.43, 20.07; HRMS (ESI)  $m/z$ :  $[\text{M}+\text{Na}]^+$  Calcd for  $\text{C}_{29}\text{H}_{24}\text{F}_3\text{NNaO}_4$  530.1550; Found: 530.1541.

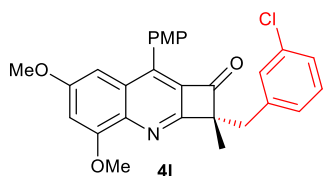

Column chromatography using DCM/EtOAc (50/1-40/1) as the eluent afforded **4l** in 94% yield (111.4mg) as a yellow solid. HPLC analysis (Chiralcel OD-3, <sup>i</sup>PrOH/hexane = 10/90, 0.5 mL/min, 205

nm;  $t_r$  (major) = 15.34 min,  $t_r$  (minor) = 12.74 min) gave the isomeric composition of the product: 90% ee;  $[\alpha]_D^{15.2} = +52.5$  ( $c = 0.92$  in  $\text{CHCl}_3$ ); m.p. 57.9-60.3 °C; <sup>1</sup>H NMR (400 MHz, Chloroform-d)  $\delta$  7.55 – 7.53 (m, 2H), 7.22 (d,  $J = 2.0$  Hz, 1H), 7.08 – 7.02 (m, 6H), 6.89 (d,  $J = 2.5$  Hz, 1H), 4.12 (s, 3H), 3.90 (s, 3H), 3.81 (s, 3H), 3.35 (d,  $J = 13.9$  Hz, 1H), 3.25

(d,  $J = 13.9$  Hz, 1H), 1.63 (s, 3H);  $^{13}\text{C}$  NMR (101 MHz, Chloroform- $d$ )  $\delta$  195.04, 170.81, 161.10, 157.93, 156.60, 139.35, 135.50, 133.74, 131.71, 130.12, 129.17, 129.11, 128.27, 126.54, 125.50, 114.42, 103.87, 97.90, 72.63, 56.59, 55.48, 55.42, 41.31, 19.89; HRMS (ESI)  $m/z$ :  $[\text{M}+\text{Na}]^+$  Calcd for  $\text{C}_{28}\text{H}_{24}\text{ClNNaO}_4$  496.1286; Found: 496.1293.

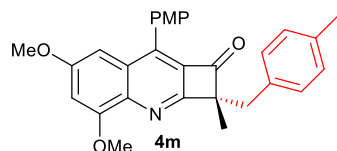

Column chromatography using DCM/EtOAc (50/1-40/1) as the eluent afforded **4m** in 96% yield (108.5 mg) as a light-yellow oil.

HPLC analysis (Chiralcel OD-3,  $^i\text{PrOH}$ /hexane = 10/90, 0.5 mL/min, 205 nm;  $t_r$  (major) = 14.10 min,  $t_r$  (minor) = 12.32 min) gave the isomeric composition of the product: 85% ee;  $[\alpha]_D^{15.3} = +38.3$  ( $c = 0.91$  in  $\text{CHCl}_3$ );  $^1\text{H}$  NMR (400 MHz, Chloroform- $d$ )  $\delta$  7.51 (d,  $J = 8.8$  Hz, 2H), 7.08 – 7.04 (m, 5H), 6.93 – 6.88 (m, 3H), 4.12 (s, 3H), 3.89 (s, 3H), 3.81 (s, 3H), 3.37 (d,  $J = 13.9$  Hz, 1H), 3.23 (d,  $J = 13.9$  Hz, 1H), 2.20 (s, 3H), 1.63 (s, 3H);  $^{13}\text{C}$  NMR (101 MHz, Chloroform- $d$ )  $\delta$  195.68, 171.36, 161.00, 157.78, 156.58, 135.75, 135.65, 134.16, 131.71, 129.95, 129.06, 128.63, 125.61, 114.35, 103.63, 97.86, 73.15, 56.55, 55.46, 55.41, 41.44, 20.97, 19.96; HRMS (ESI)  $m/z$ :  $[\text{M}+\text{Na}]^+$  Calcd for  $\text{C}_{29}\text{H}_{27}\text{NNaO}_4$  476.1832; Found: 476.1835.

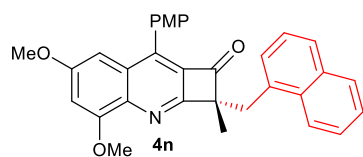

Column chromatography using DCM/EtOAc (50/1-40/1) as the eluent afforded **4n** in 89% yield (108.6 mg) as a yellow solid.

HPLC analysis (Chiralcel AD-H,  $^i\text{PrOH}$ /hexane = 20/80, 1.0 mL/min, 205 nm;  $t_r$  (major) = 15.63 min,  $t_r$  (minor) = 13.86 min) gave the isomeric composition of the product: 87% ee;  $[\alpha]_D^{15.4} = +93.3$  ( $c = 0.95$  in  $\text{CHCl}_3$ ); m.p. 84.3-86.0  $^\circ\text{C}$ ;  $^1\text{H}$  NMR (400 MHz, Chloroform- $d$ )  $\delta$  8.27 (d,  $J = 8.5$  Hz, 1H), 7.68 (d,  $J = 8.1$  Hz, 1H), 7.58 (d,  $J = 8.2$  Hz, 1H), 7.45 – 7.41 (m, 2H), 7.38 – 7.32 (m, 3H), 7.27 – 7.24 (m, 2H), 6.99 – 6.97 (m, 3H), 6.84 (d,  $J = 2.5$  Hz, 1H), 4.11 (s, 3H), 3.89 – 3.76 (m, 8H), 1.74 (s, 3H);  $^{13}\text{C}$  NMR (101 MHz, Chloroform- $d$ )  $\delta$  195.25, 171.20, 160.94, 157.74, 156.57, 141.62, 135.59, 133.73, 133.66, 132.25, 131.64, 128.95, 128.90, 128.18, 127.14, 125.51, 125.36, 125.26, 125.12, 125.07, 114.30, 103.65, 97.78, 73.32, 56.56, 55.42, 55.37, 37.78, 20.41; HRMS (ESI)  $m/z$ :  $[\text{M}+\text{Na}]^+$  Calcd for  $\text{C}_{32}\text{H}_{27}\text{NNaO}_4$  512.1832; Found: 512.1822.

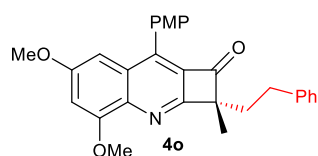

Column chromatography using DCM/EtOAc (50/1-40/1) as the eluent afforded **4o** in 97% yield (109.3 mg) as a light-yellow oil.

HPLC analysis (Chiralcel AD-H,  $^i\text{PrOH}$ /hexane = 20/80, 1.0 mL/min,

205 nm;  $t_r$  (major) = 14.27 min,  $t_r$  (minor) = 11.41 min) gave the isomeric composition of the product: 85% ee;  $[\alpha]_D^{15.2} = -3.9$  ( $c = 0.69$  in  $\text{CHCl}_3$ );  $^1\text{H}$  NMR (400 MHz, Chloroform- $d$ )  $\delta$  7.72 (d,  $J = 8.7$  Hz, 2H), 7.21 – 7.17 (m, 3H), 7.12 – 7.09 (m, 5H), 6.90 (d,  $J = 2.5$  Hz, 1H), 4.11 (s, 3H), 3.92 (s, 3H), 3.84 (s, 3H), 2.73 – 2.60 (m, 2H), 2.41 – 2.27 (m, 2H), 1.66 (s, 3H);  $^{13}\text{C}$  NMR (101 MHz, Chloroform- $d$ )  $\delta$  196.32, 171.77, 161.14, 157.93, 156.63, 142.03, 141.80, 141.74, 135.69, 131.92, 129.15, 129.03, 128.29, 128.25, 125.79, 125.66, 125.30, 114.46, 103.73, 97.98, 72.11, 56.52, 55.52, 55.44, 37.13, 32.17, 20.38. HRMS (ESI)  $m/z$ :  $[\text{M}+\text{Na}]^+$  Calcd for  $\text{C}_{29}\text{H}_{27}\text{NNaO}_4$  476.1832; Found: 476.1835.

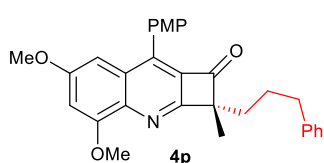

Column chromatography using DCM/EtOAc (50/1-40/1) as the eluent afforded **4p** in 97% yield (113.0 mg) as a yellow solid. HPLC analysis (Chiralcel AD-H,  $^i\text{PrOH}$ /hexane = 20/80, 1.0 mL/min, 205 nm;  $t_r$  (major) = 12.53 min,  $t_r$  (minor) = 8.68 min) gave the isomeric composition of the product: 91% ee;  $[\alpha]_D^{15.3} = +3.8$  ( $c = 1.08$  in  $\text{CHCl}_3$ ); m.p. 173.5-175.1  $^\circ\text{C}$ ;  $^1\text{H}$  NMR (400 MHz, Chloroform- $d$ )  $\delta$  7.70 (d,  $J = 8.7$  Hz, 2H), 7.20 (t,  $J = 7.4$  Hz, 2H), 7.15 – 7.08 (m, 6H), 6.88 (d,  $J = 2.5$  Hz, 1H), 4.10 (s, 3H), 3.91 (s, 3H), 3.82 (s, 3H), 2.57 (t,  $J = 7.8$  Hz, 2H), 2.14 – 1.99 (m, 2H), 1.70 – 1.60 (m, 5H);  $^{13}\text{C}$  NMR (101 MHz, Chloroform- $d$ )  $\delta$  196.67, 172.06, 161.11, 157.85, 156.54, 142.02, 135.51, 131.91, 129.13, 128.44, 128.23, 125.70, 125.65, 114.42, 103.66, 97.99, 72.14, 56.53, 55.51, 55.43, 36.33, 35.31, 27.77, 20.41; HRMS (ESI)  $m/z$ :  $[\text{M}+\text{Na}]^+$  Calcd for  $\text{C}_{30}\text{H}_{29}\text{NNaO}_4$  490.1989; Found: 490.1990.

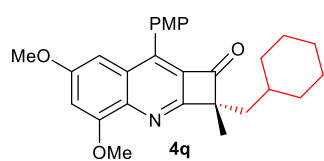

Column chromatography using DCM/EtOAc (50/1-40/1) as the eluent afforded **4q** in 97% yield (108.1 mg) as a yellow solid. HPLC analysis (Chiralcel AD-H,  $^i\text{PrOH}$ /hexane = 10/90, 1.0 mL/min, 205 nm;  $t_r$  (major) = 22.53 min,  $t_r$  (minor) = 20.20 min) gave the isomeric composition of the product: 89% ee;  $[\alpha]_D^{15.4} = +16.5$  ( $c = 0.88$  in  $\text{CHCl}_3$ ); m.p. 67.3-71  $^\circ\text{C}$ ;  $^1\text{H}$  NMR (400 MHz, Chloroform- $d$ )  $\delta$  7.72 (d,  $J = 8.8$  Hz, 2H), 7.16 (d,  $J = 2.5$  Hz, 1H), 7.10 (d,  $J = 8.8$  Hz, 2H), 6.88 (d,  $J = 2.5$  Hz, 1H), 4.10 (s, 3H), 3.90 (s, 3H), 3.83 (s, 3H), 1.94 (d,  $J = 6.4$  Hz, 2H), 1.73 – 1.51 (m, 9H), 1.17 – 1.04 (m, 3H), 0.97 – 0.84 (m, 2H);  $^{13}\text{C}$  NMR (101 MHz, Chloroform- $d$ )  $\delta$  196.82, 172.49, 161.05, 157.79, 156.61, 141.85, 141.70, 135.69, 131.83, 129.03, 125.69, 114.42, 103.60, 97.92, 71.84, 56.50, 55.47, 55.40, 43.11, 34.76, 34.36, 34.14, 26.21, 26.15, 26.12, 21.02; HRMS (ESI)  $m/z$ :  $[\text{M}+\text{Na}]^+$  Calcd for  $\text{C}_{28}\text{H}_{31}\text{NNaO}_4$  468.2145; Found: 468.2150.

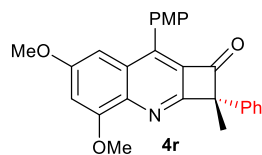

Column chromatography using DCM/EtOAc (50/1-40/1) as the eluent afforded **4r** in 84% yield (89.3 mg) as a light-yellow oil. HPLC analysis (Chiralcel AD-H, <sup>i</sup>PrOH/hexane = 20/80, 1.0 mL/min, 205 nm; t<sub>r</sub> (major)

= 18.37 min, t<sub>r</sub> (minor) = 7.54 min) gave the isomeric composition of the product: 77% ee; [α]<sub>D</sub><sup>15.3</sup> = +64.6 (c = 0.36 in CHCl<sub>3</sub>); m.p. 129.4-133.2 °C; <sup>1</sup>H NMR (400 MHz, Chloroform-d) δ 7.72 (d, J = 8.8 Hz, 2H), 7.68 – 7.66 (m, 2H), 7.33 (t, J = 7.5 Hz, 2H), 7.26 – 7.20 (m, 1H), 7.16 (d, J = 2.6 Hz, 1H), 7.10 – 7.08 (m, 2H), 6.92 (d, J = 2.5 Hz, 1H), 4.13 (s, 3H), 3.90 (s, 3H), 3.84 (s, 3H), 1.98 (s, 3H); <sup>13</sup>C NMR (101 MHz, Chloroform-d) δ 193.12, 170.40, 161.18, 158.09, 156.71, 143.05, 142.11, 140.41, 135.33, 131.93, 129.25, 128.49, 126.97, 126.24, 125.52, 114.44, 103.90, 97.89, 75.16, 56.57, 55.54, 55.45, 23.25. HRMS (ESI) m/z: [M+Na]<sup>+</sup> Calcd for C<sub>27</sub>H<sub>23</sub>NNaO<sub>4</sub> 448.1519; Found: 448.1515.

#### 4. General procedure for the reduction of **4l** to **5**.

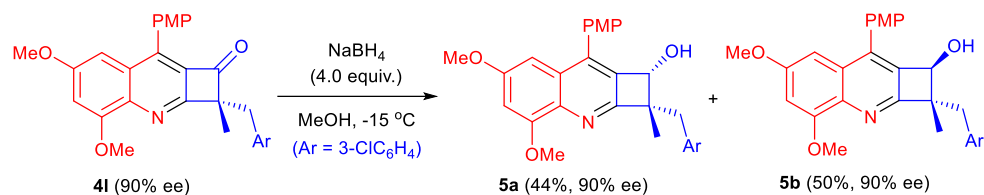

To a flame dried 25 mL Schlenk tube was added **4l** (0.47 mmol, 223 mg), the tube was the evacuated, back filled with  $\text{N}_2$  and added anhydrous MeOH (3 mL). The solution was cooled to  $-15\text{ }^\circ\text{C}$  and stirred for 15 min before the slowly addition of  $\text{NaBH}_4$ . After additional 1.0 hour at  $-15\text{ }^\circ\text{C}$ , the reaction was quenched by slowly addition of saturated  $\text{NH}_4\text{Cl}$  (5 mL) and diluted with EtOAc (20 mL). The biphasic solution was separated and the organic phase was dried over anhydrous  $\text{MgSO}_4$ . After filtration, the solvent was evaporated under vacuum and the residue was subjected to column chromatography to afford **5a** and **5b**.

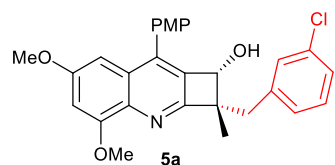

Column chromatography using PE/EtOAc (3/1-1/1) as the eluent afforded **5a** in 44% yield (98.6 mg) as a light-yellow solid. HPLC analysis (Chiralcel OD-H,  $^i\text{PrOH/hexane} = 15/85$ , 1.0 mL/min, 205 nm;  $t_r$  (major) = 16.84 min,  $t_r$  (minor) = 13.78 min) gave the isomeric composition of the product: 90% ee;  $[\alpha]_D^{32.2} = +16.7$  ( $c = 0.90$  in  $\text{CHCl}_3$ ); m.p.  $84.5\text{-}86.2\text{ }^\circ\text{C}$ ;  $^1\text{H NMR}$  (400 MHz, Chloroform- $d$ )  $\delta$  7.60 (d,  $J = 8.7$  Hz, 2H), 7.48 (s, 1H), 7.26 – 7.17 (m, 3H), 7.05 (d,  $J = 8.7$  Hz, 2H), 6.95 (d,  $J = 2.6$  Hz, 1H), 6.75 (d,  $J = 2.6$  Hz, 1H), 5.05 (s, 1H), 4.06 (s, 3H), 3.89 (s, 3H), 3.79 (s, 3H), 3.33 – 3.23 (m, 2H), 1.42 (s, 3H);  $^{13}\text{C NMR}$  (101 MHz, Chloroform- $d$ )  $\delta$  166.29, 160.05, 157.21, 156.45, 142.40, 140.56, 135.77, 134.00, 131.26, 129.88, 129.47, 128.07, 126.82, 126.50, 114.21, 100.75, 96.84, 74.85, 58.90, 56.34, 55.39, 55.35, 42.50, 18.06; HRMS (ESI)  $m/z$ :  $[\text{M}+\text{Na}]^+$  Calcd for  $\text{C}_{28}\text{H}_{26}\text{ClNNaO}_4$  498.1443; Found: 498.1444.

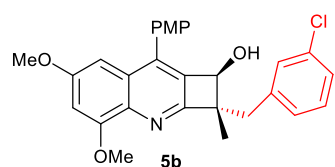

Column chromatography using PE/EtOAc (3/1-1/1) as the eluent afforded **5b** in 50% yield (111.0 mg) as a light-yellow solid. HPLC analysis (Chiralcel AD-H,  $^i\text{PrOH/hexane} = 15/85$ , 1.0 mL/min, 205 nm;  $t_r$  (major) = 16.70 min,  $t_r$  (minor) = 10.34 min) gave the isomeric composition of the product: 90% ee;  $[\alpha]_D^{32.2} = +84.8$  ( $c = 0.82$  in  $\text{CHCl}_3$ ); m.p.  $91.5\text{-}92.3\text{ }^\circ\text{C}$ ;  $^1\text{H NMR}$  (400 MHz, Chloroform- $d$ )  $\delta$  7.58 (d,  $J = 8.8$  Hz, 2H), 7.25 (d,  $J = 10.9$  Hz, 1H), 7.16 – 7.03 (m, 5H), 6.95 (d,  $J = 2.6$  Hz,

1H), 6.76 (d, J = 2.6 Hz, 1H), 5.19 (s, 1H), 4.07 (s, 3H), 3.88 (s, 3H), 3.78 (s, 3H), 3.22 (dd, 2H), 1.45 (s, 3H); <sup>13</sup>C NMR (101 MHz, Chloroform-d) δ 166.27, 160.05, 157.22, 156.44, 142.42, 140.55, 135.74, 134.00, 131.26, 129.88, 129.47, 128.07, 126.81, 126.50, 114.21, 100.75, 96.83, 74.84, 58.89, 56.33, 55.40, 55.35, 42.50, 18.06; HRMS (ESI) m/z: [M+Na]<sup>+</sup> Calcd for C<sub>28</sub>H<sub>26</sub>CINNaO<sub>4</sub> 498.1443; Found: 498.1444.

## 5. Crystallographic information for product 4a

The single crystal of compound **4a** was prepared from its solution in dichloromethane/petroleum ether by slow evaporation of the solvent. The data integration and empirical absorption correction were carried out using SAINT program. Using Olex2 and SHELXTL, the structure was solved by direct method and refined matrix least-squares on F<sup>2</sup> with anisotropic displacement. Non-hydrogen atoms were refined an isotropically, hydrogen atoms were constrained to ideal geometries. The absolute configuration was determined by single crystal X-ray diffraction analysis on Rigaku XtaLAB PRO MM003-DS dual system with a Cu micro-focus source.

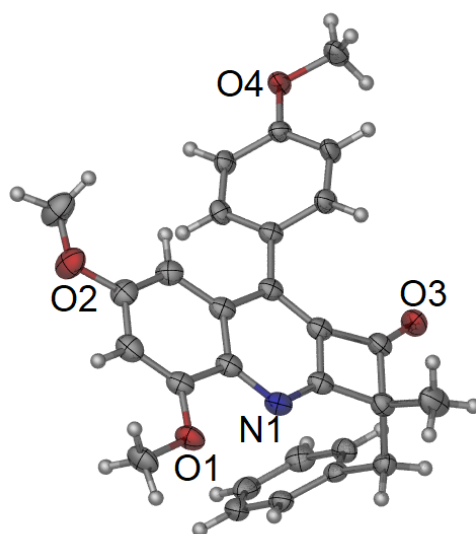

**Figure S1.** ORTEP of **4a** (The ellipsoid contour of probability level is 50%).

**Table S1** Crystal data and structure refinement for **4a**.

|                                    |                                                 |
|------------------------------------|-------------------------------------------------|
| Deposition Number                  | 2364614                                         |
| Identification code                | exp_3756_auto                                   |
| Empirical formula                  | C <sub>28</sub> H <sub>25</sub> NO <sub>4</sub> |
| Formula weight                     | 439.49                                          |
| Temperature/K                      | 173.00(10)                                      |
| Crystal system                     | orthorhombic                                    |
| Space group                        | P2 <sub>1</sub> 2 <sub>1</sub> 2 <sub>1</sub>   |
| a/Å                                | 10.00580(10)                                    |
| b/Å                                | 16.9779(2)                                      |
| c/Å                                | 26.8076(2)                                      |
| α/°                                | 90                                              |
| β/°                                | 90                                              |
| γ/°                                | 90                                              |
| Volume/Å <sup>3</sup>              | 4554.01(8)                                      |
| Z                                  | 8                                               |
| ρ <sub>calc</sub> /cm <sup>3</sup> | 1.282                                           |



---

|                                                |                                                               |
|------------------------------------------------|---------------------------------------------------------------|
| $\mu/\text{mm}^{-1}$                           | 0.689                                                         |
| F(000)                                         | 1856.0                                                        |
| Crystal size/ $\text{mm}^3$                    | $0.36 \times 0.32 \times 0.26$                                |
| Radiation                                      | Cu K $\alpha$ ( $\lambda = 1.54184$ )                         |
| $2\Theta$ range for data collection/ $^\circ$  | 6.162 to 134.158                                              |
| Index ranges                                   | $-11 \leq h \leq 11, -20 \leq k \leq 20, -32 \leq l \leq 32$  |
| Reflections collected                          | 121861                                                        |
| Independent reflections                        | 8098 [ $R_{\text{int}} = 0.0538, R_{\text{sigma}} = 0.0185$ ] |
| Data/restraints/parameters                     | 8098/0/603                                                    |
| Goodness-of-fit on $F^2$                       | 1.050                                                         |
| Final R indexes [ $I \geq 2\sigma(I)$ ]        | $R_1 = 0.0304, wR_2 = 0.0761$                                 |
| Final R indexes [all data]                     | $R_1 = 0.0316, wR_2 = 0.0767$                                 |
| Largest diff. peak/hole / $e \text{ \AA}^{-3}$ | 0.52/-0.14                                                    |
| Flack parameter                                | -0.04(4)                                                      |

---

<sup>1</sup>H NMR Spectrum (600 MHz, Chloroform-d) of **1a**

w1e-c-56-2.1.fid

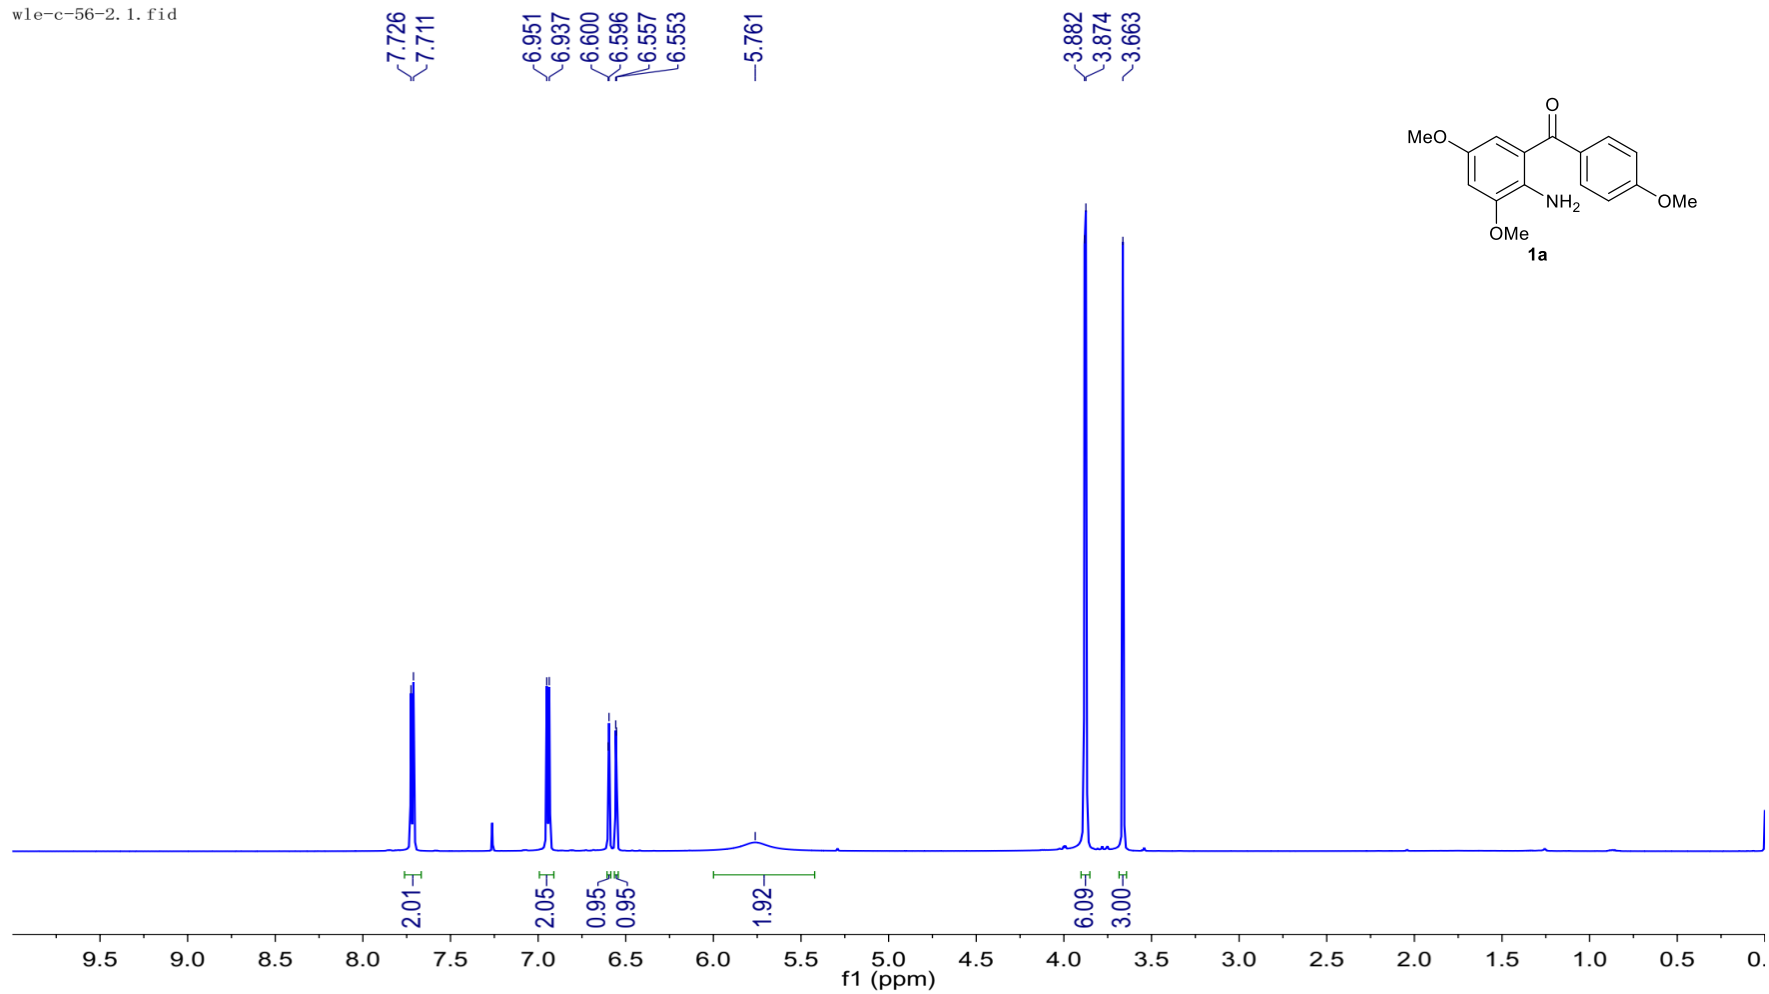

$^{13}\text{C}$   $\{^1\text{H}\}$  NMR Spectrum (101 MHz, Chloroform-d) of **1a**

w1e-c-56-2-c.1.f1.d

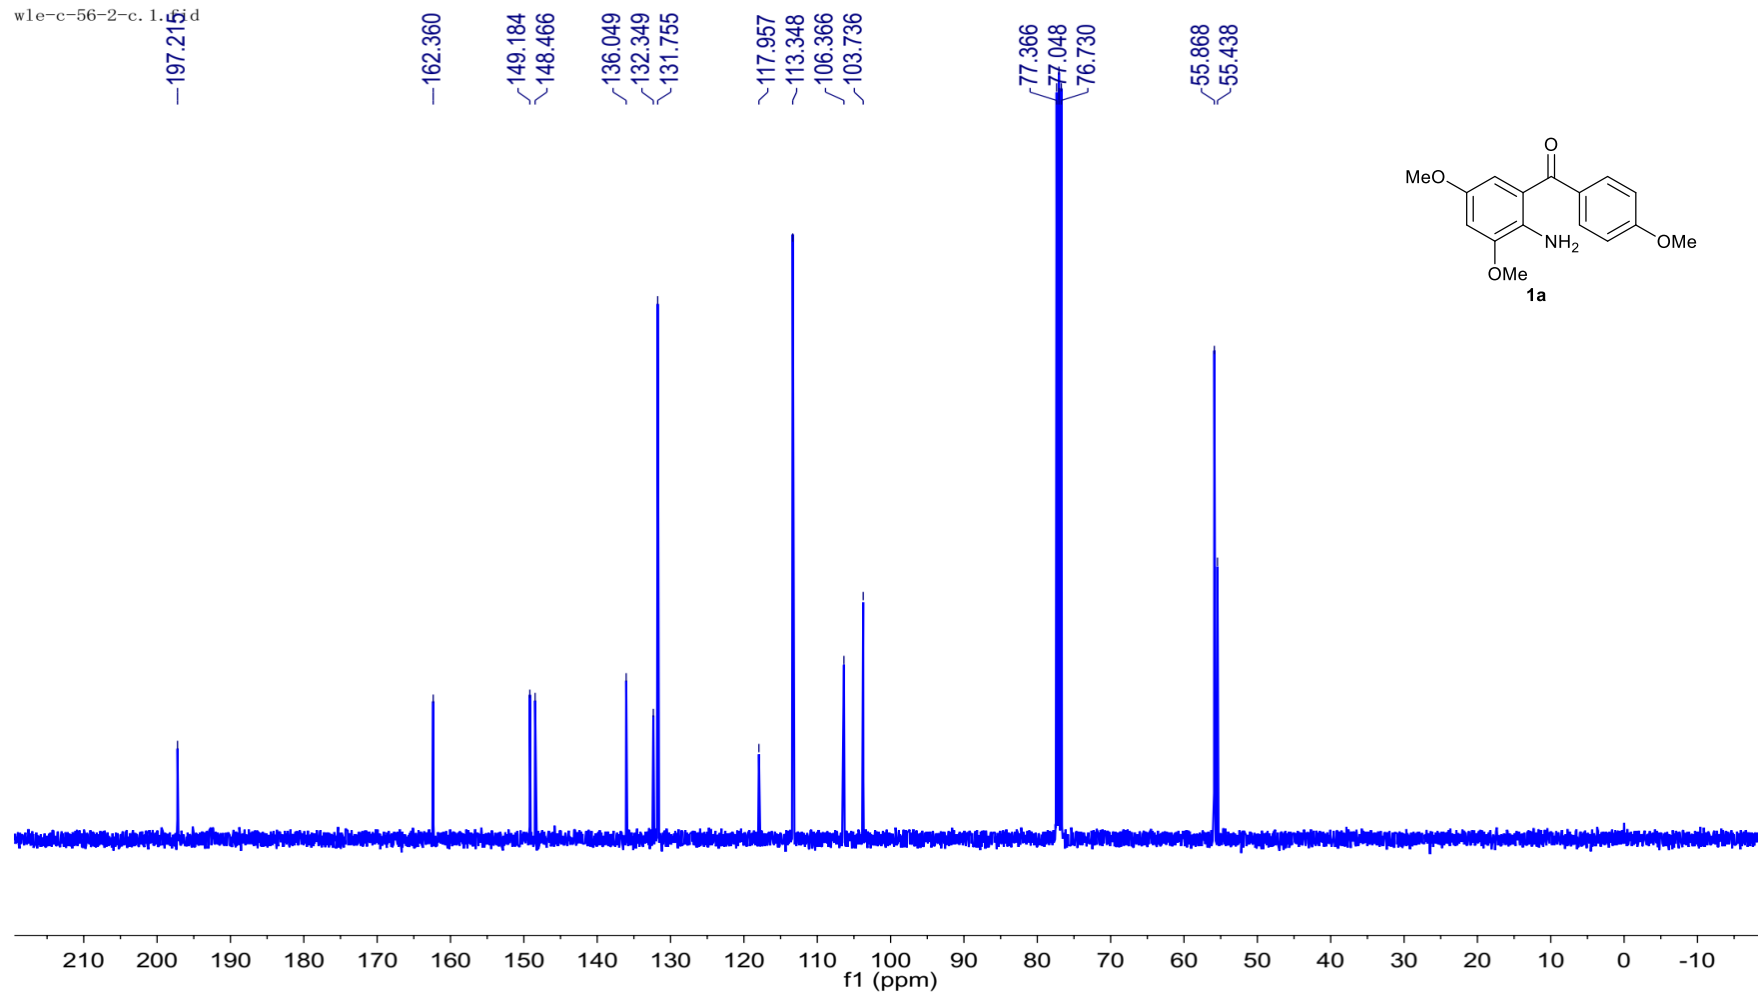

<sup>1</sup>H NMR Spectrum (600 MHz, Chloroform-d) of **1b**

w1e-c-29. 1. fid

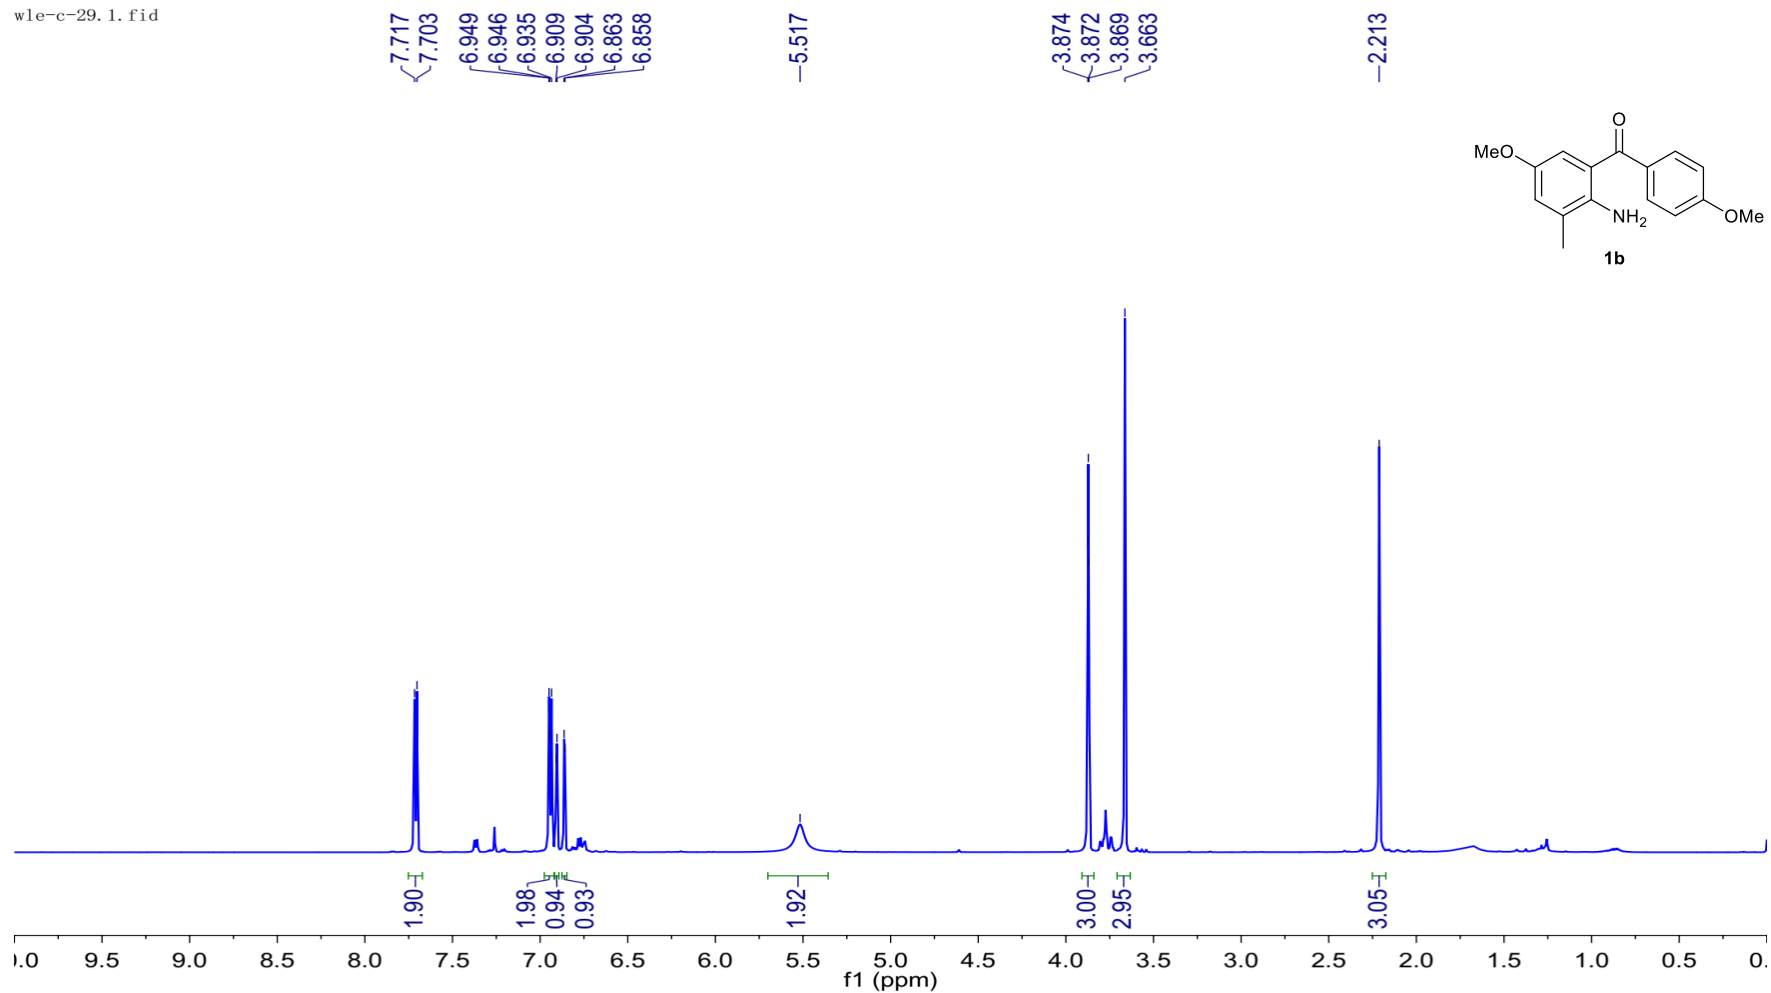

$^{13}\text{C}$   $\{^1\text{H}\}$  NMR Spectrum (101 MHz, Chloroform-d) of **1b**

WLE-C-29-C. 1. f2

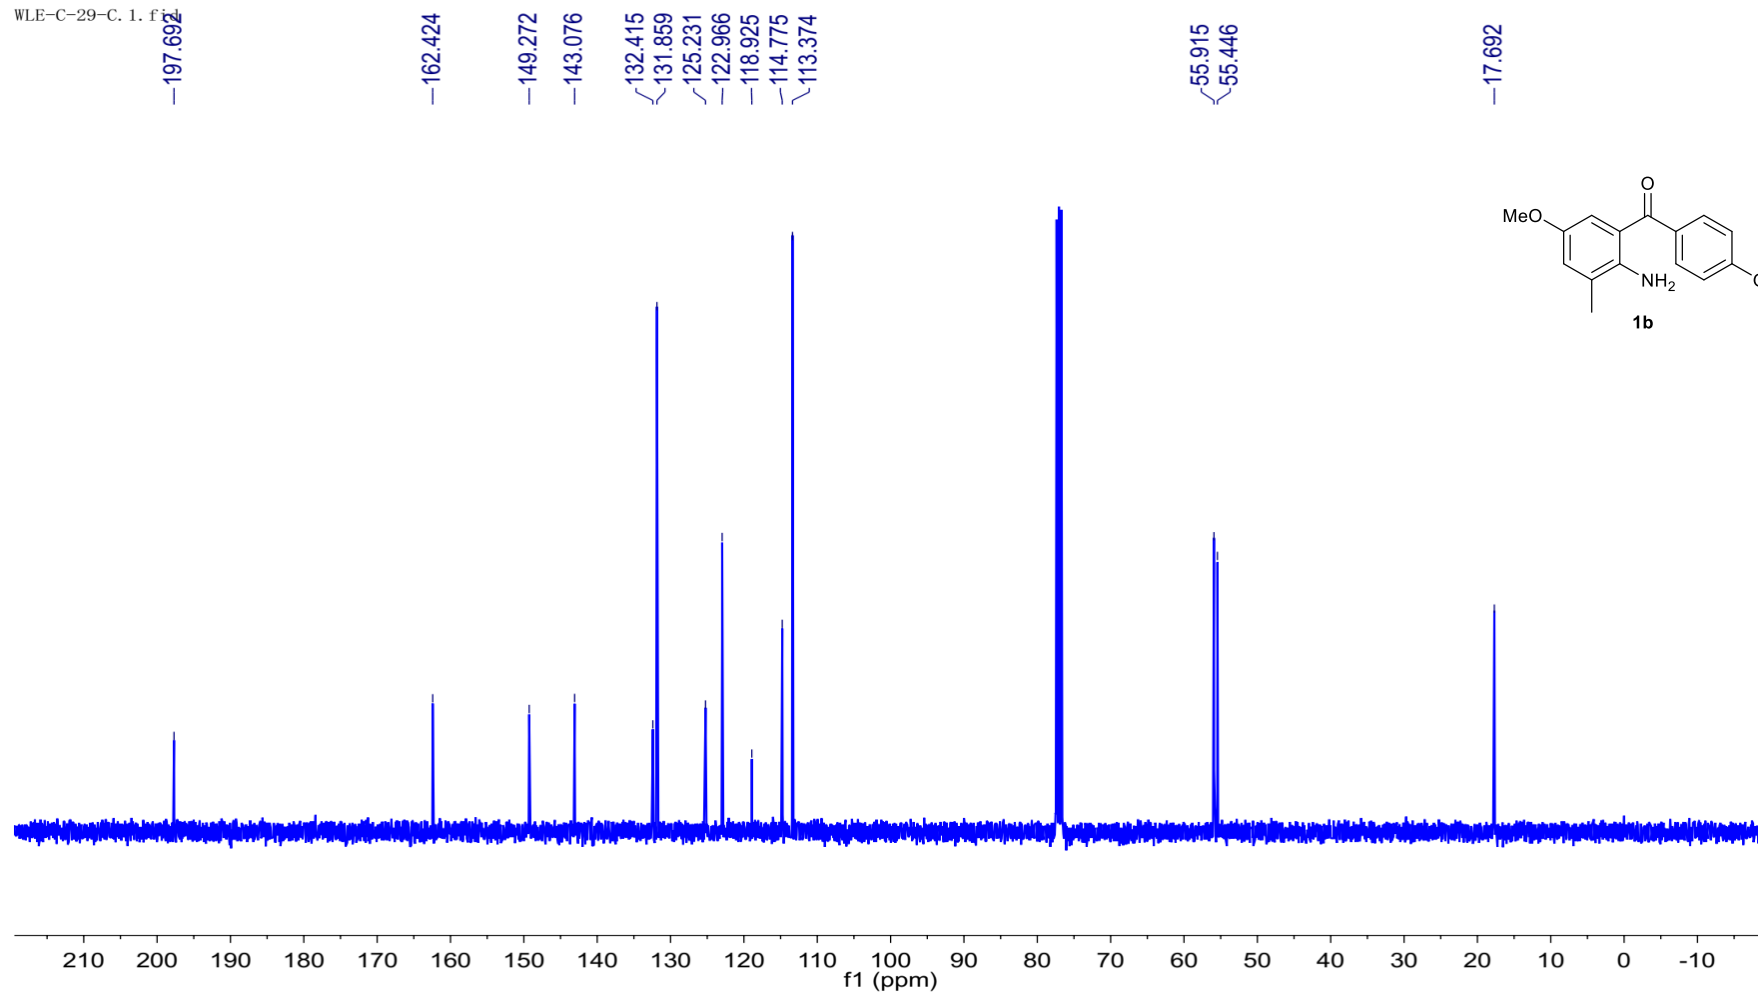

<sup>1</sup>H NMR Spectrum (400 MHz, Chloroform-d) of **1c**

w1e-c-42.1.fid

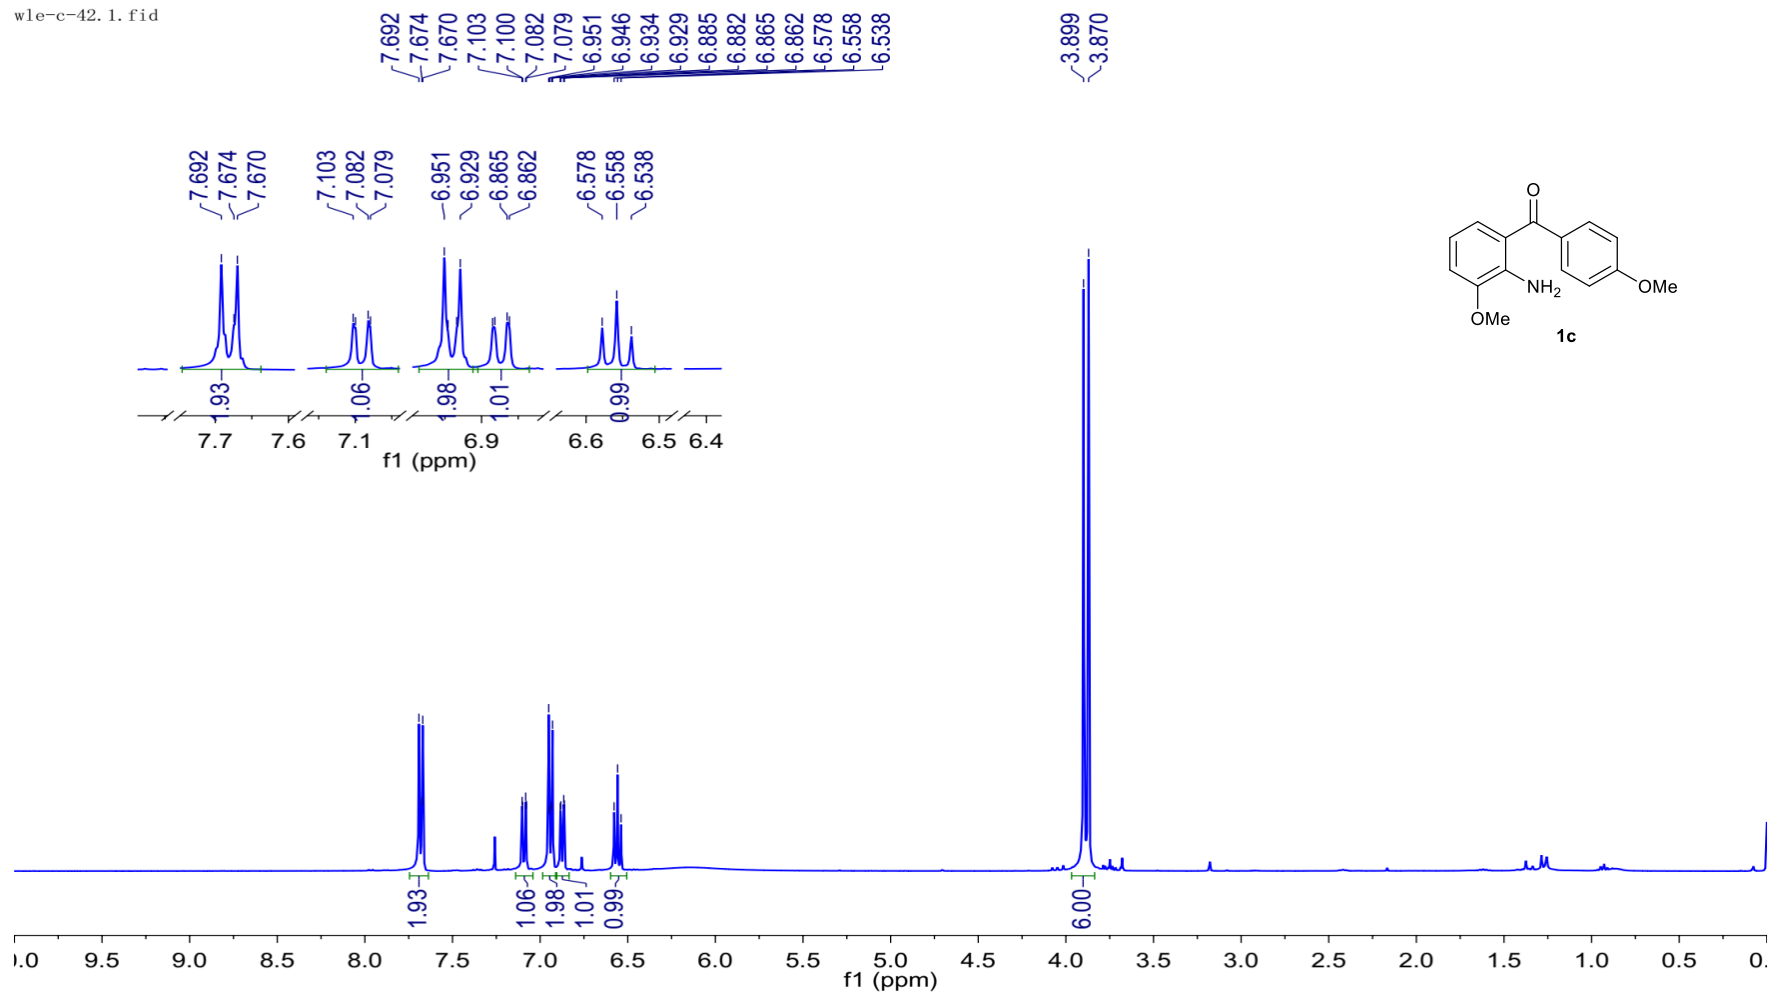

$^{13}\text{C}$   $\{^1\text{H}\}$  NMR Spectrum (101 MHz, Chloroform-d) of **1c**

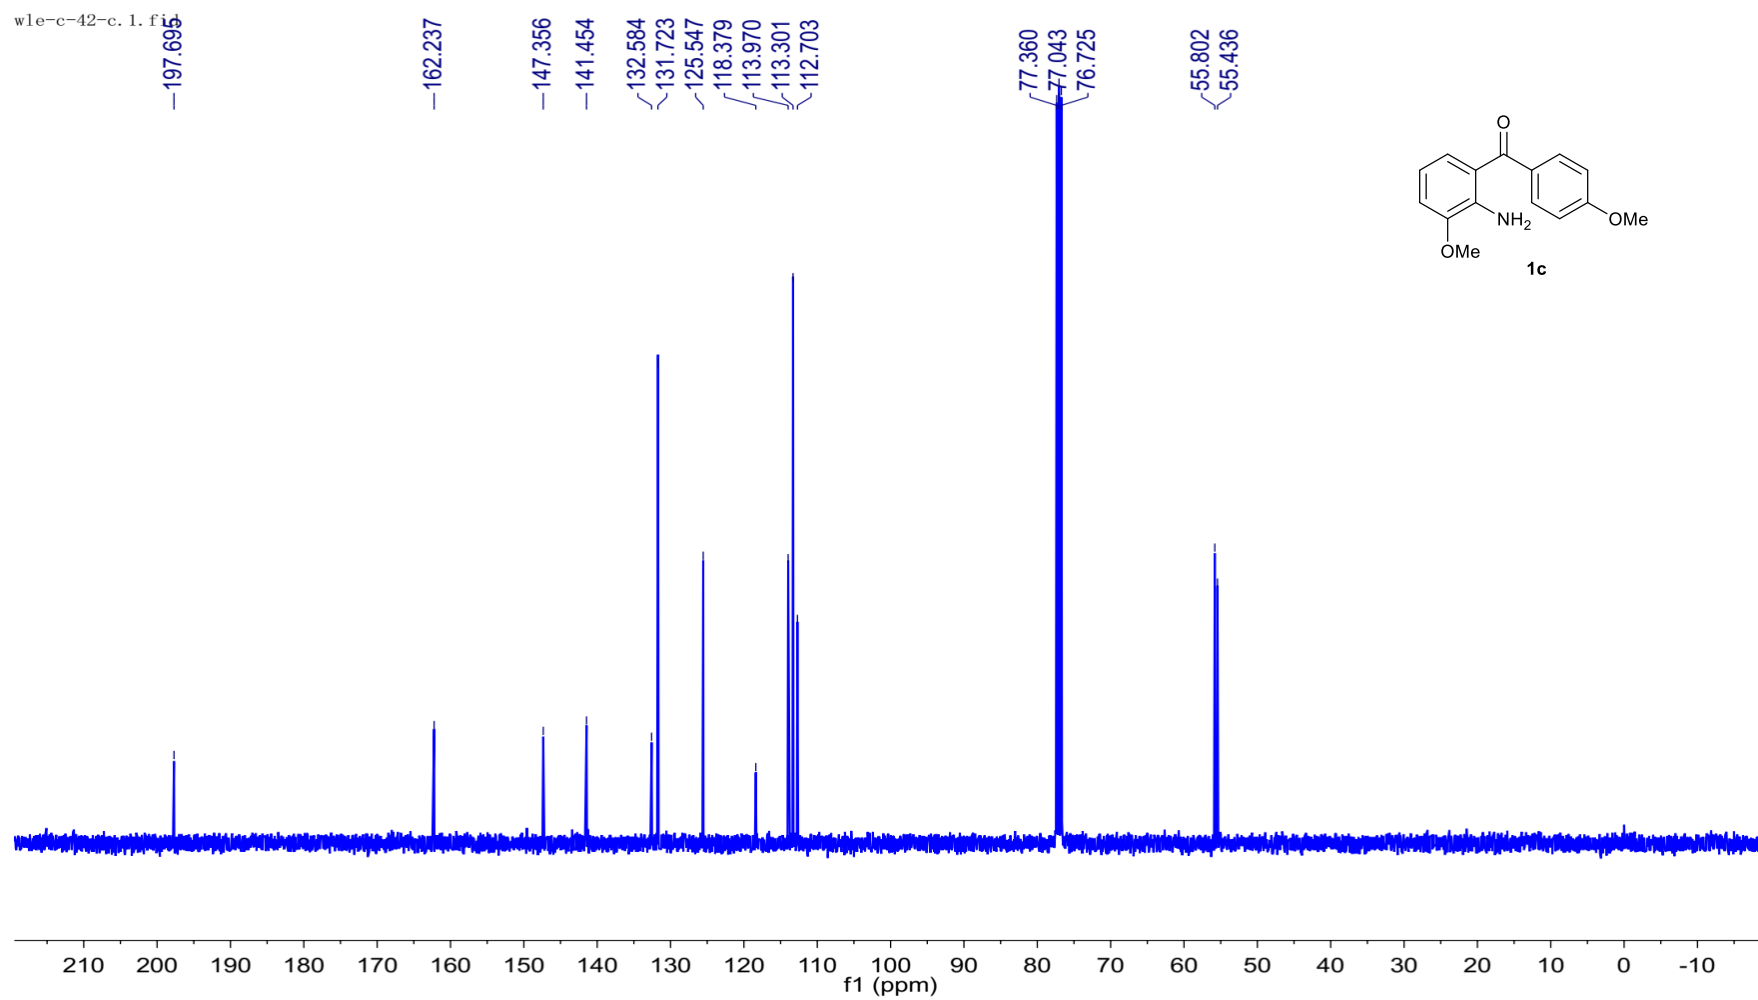

<sup>1</sup>H NMR Spectrum (600 MHz, Chloroform-d) of **1d**

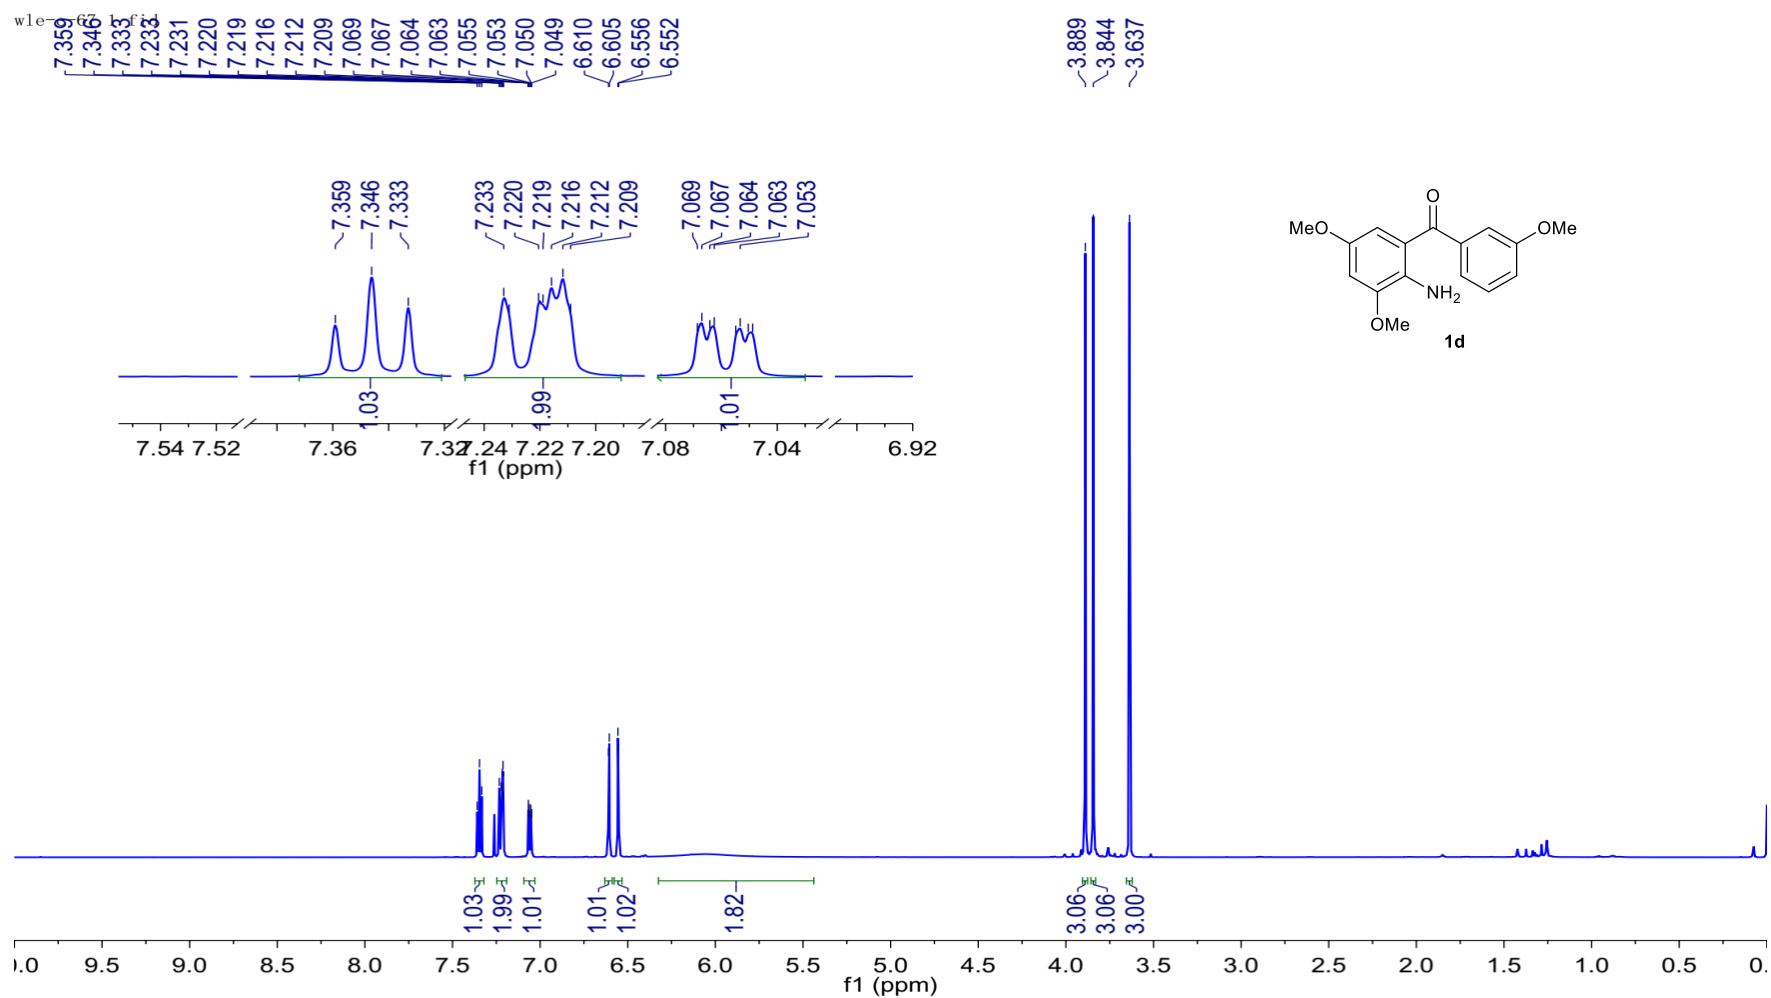



$^{13}\text{C}$  { $^1\text{H}$ } NMR Spectrum (101 MHz, Chloroform-d) of **1d**

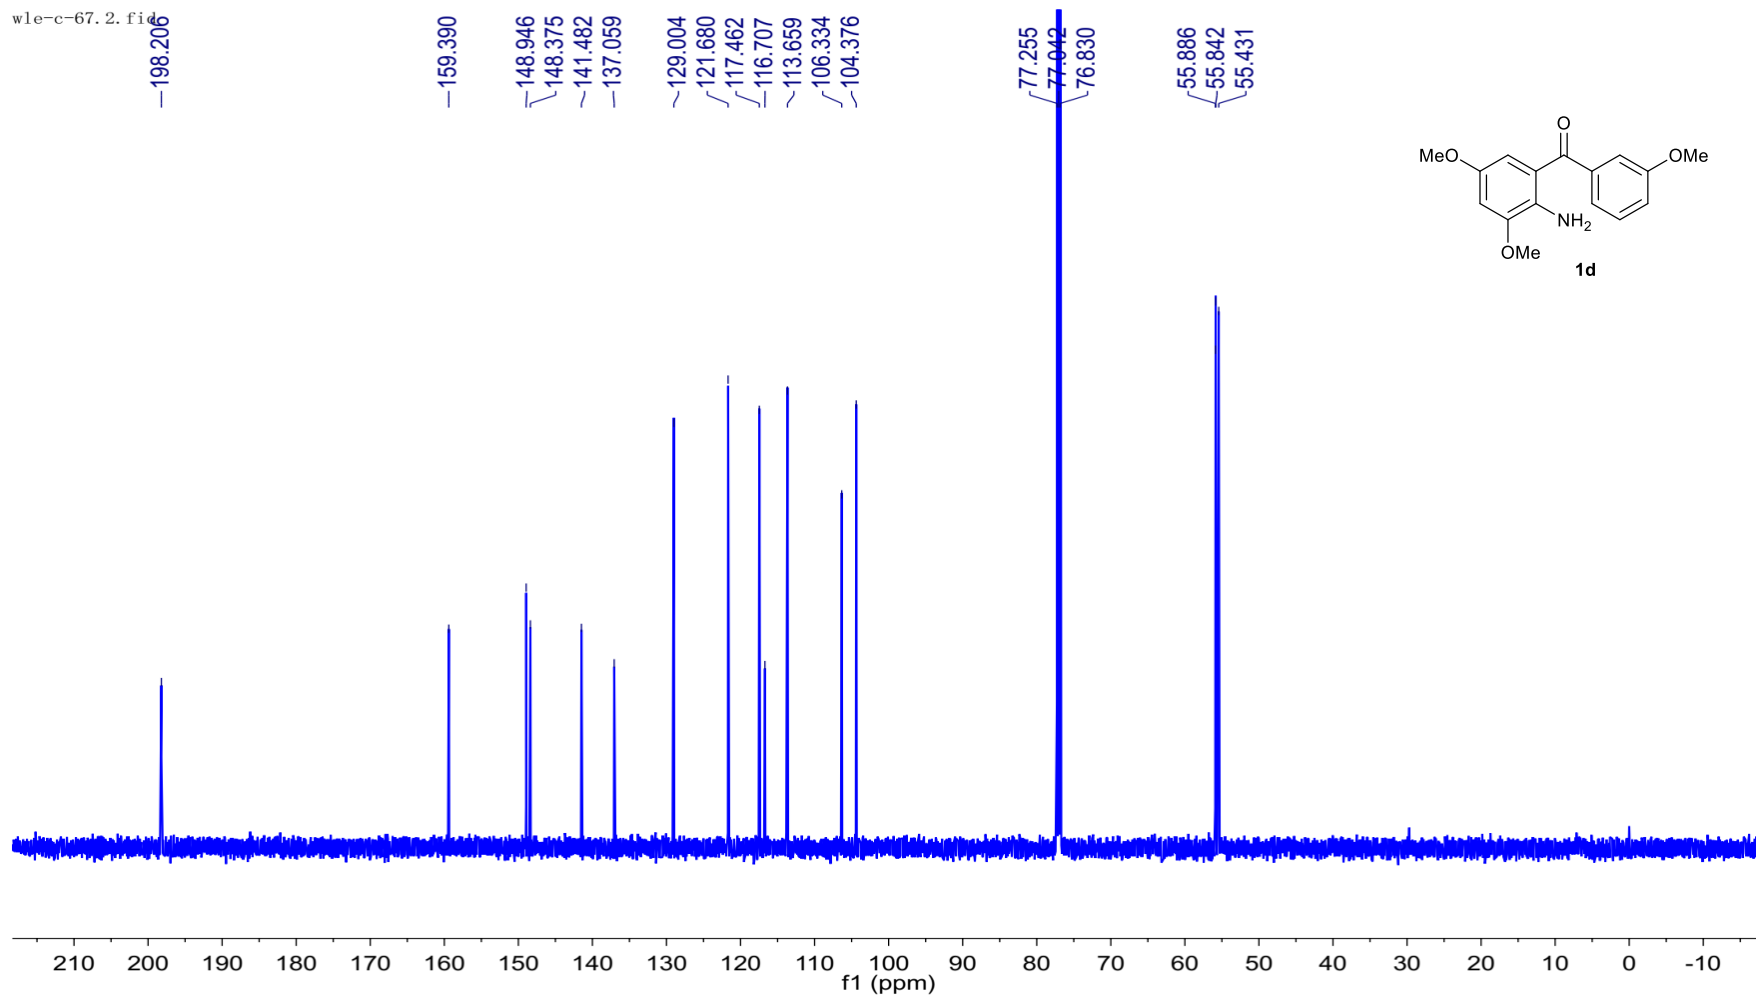

<sup>1</sup>H NMR Spectrum (600 MHz, Chloroform-d) of **1e**

w1e-c-56-1.1.fid

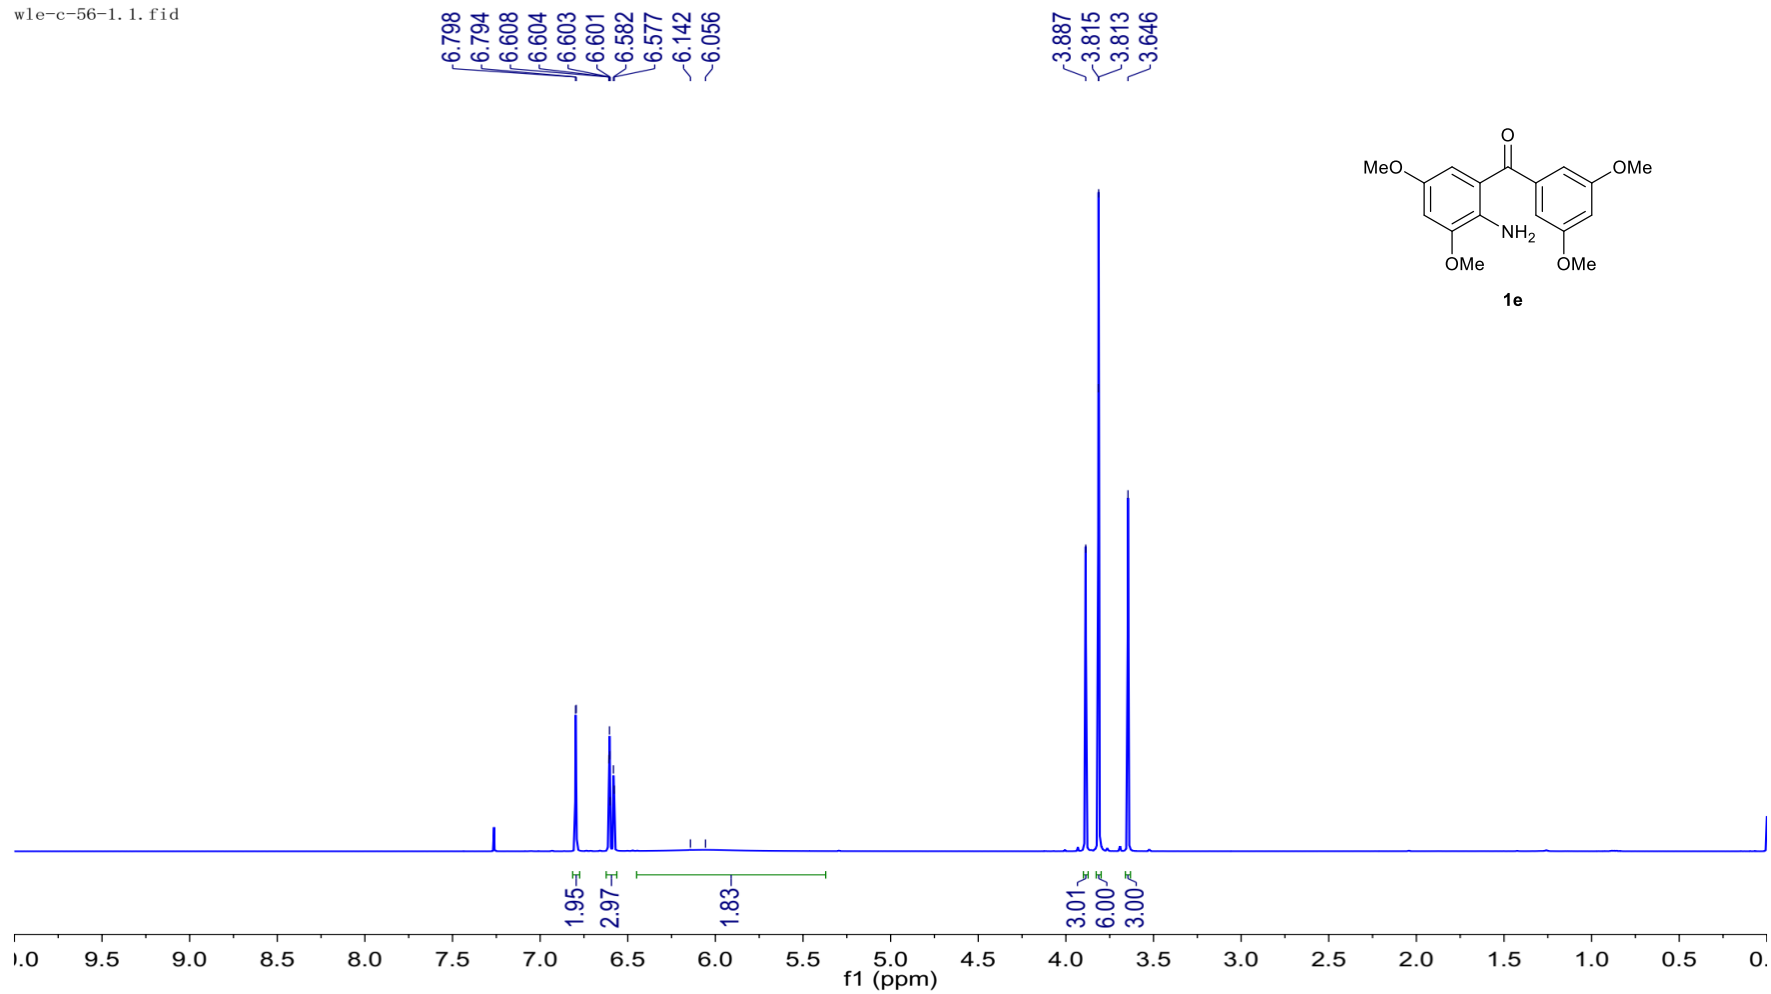

$^{13}\text{C}$   $\{^1\text{H}\}$  NMR Spectrum (101 MHz, Chloroform-d) of **1e**

w1e-c-56-1-c.1fid

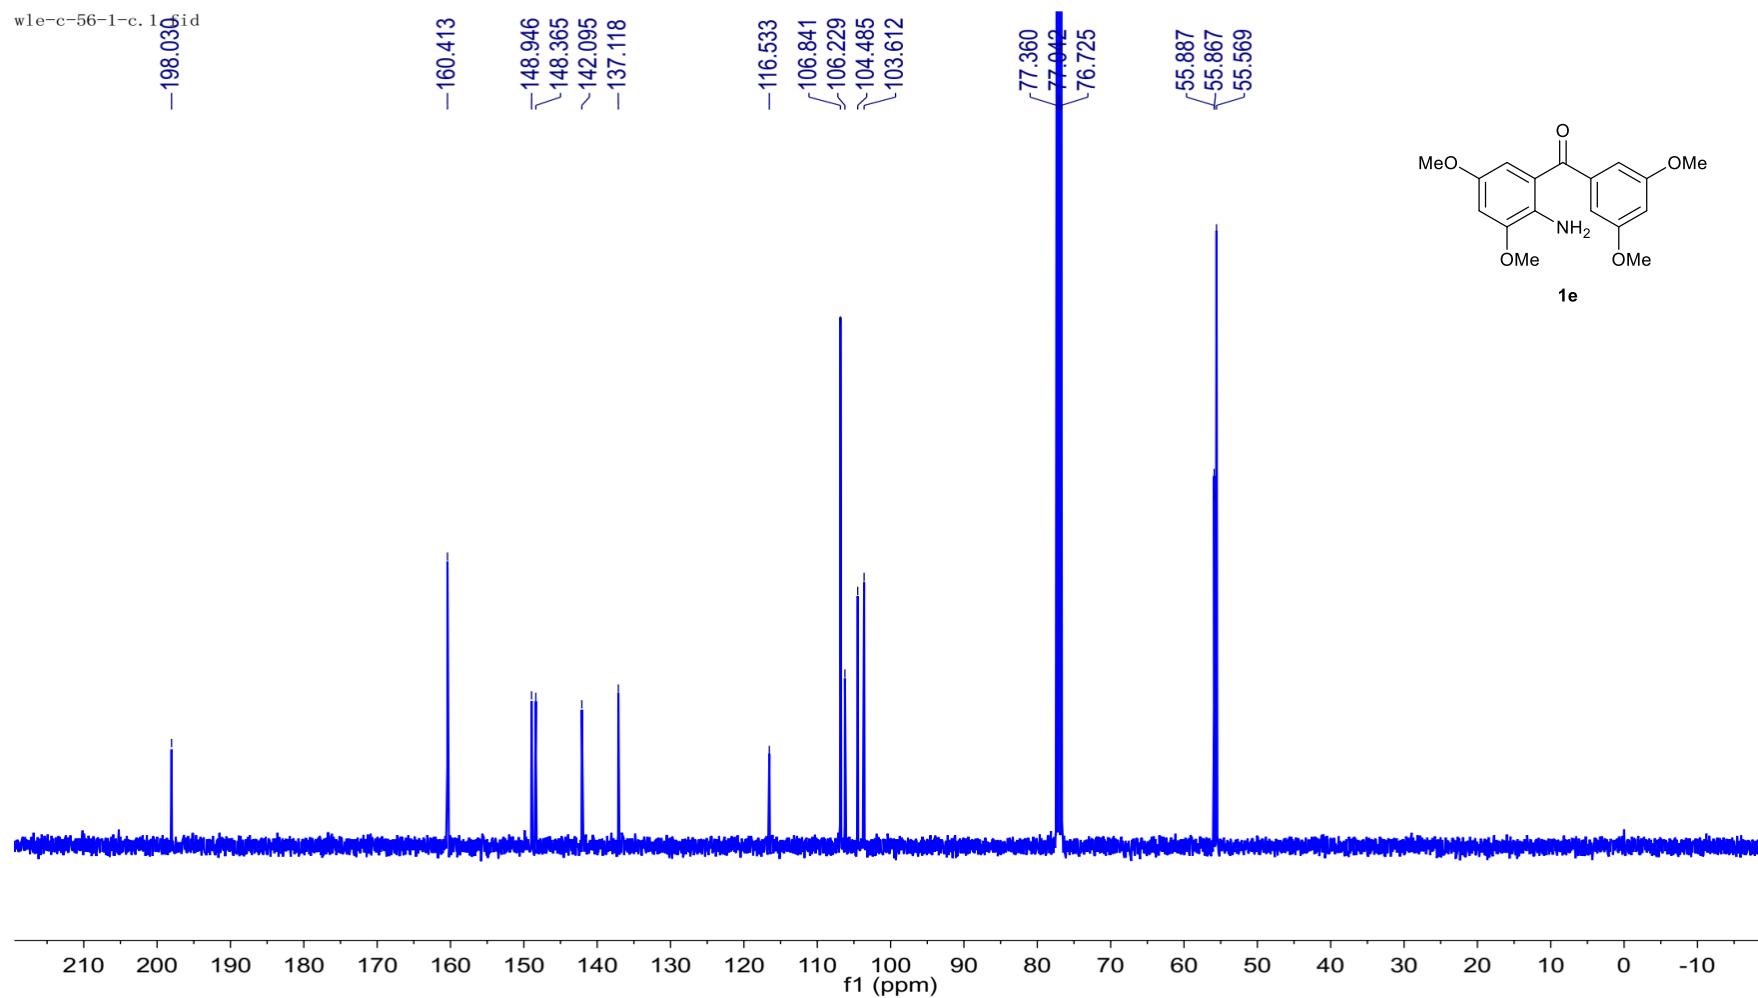

<sup>1</sup>H NMR Spectrum (400 MHz, Chloroform-d) of **1f**

wle-c-96.1.fid

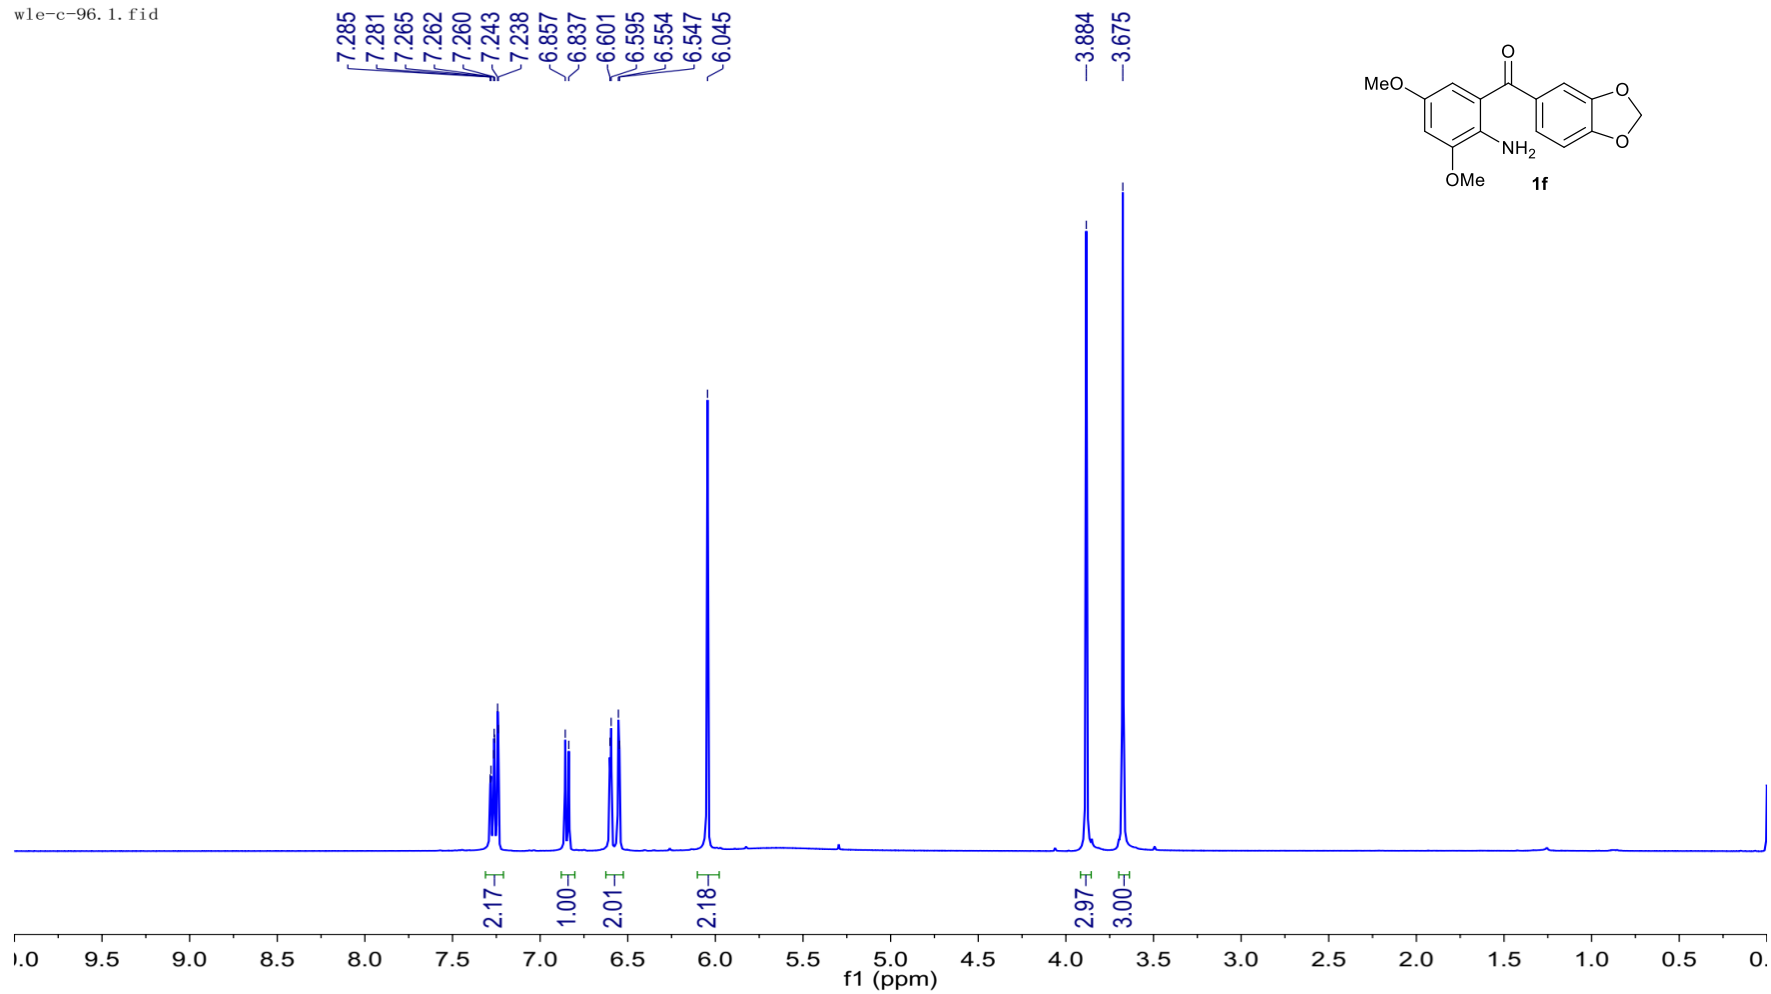

$^{13}\text{C}$   $\{^1\text{H}\}$  NMR Spectrum (101 MHz, Chloroform-d) of **1f**

wle-c-96. 2. fid

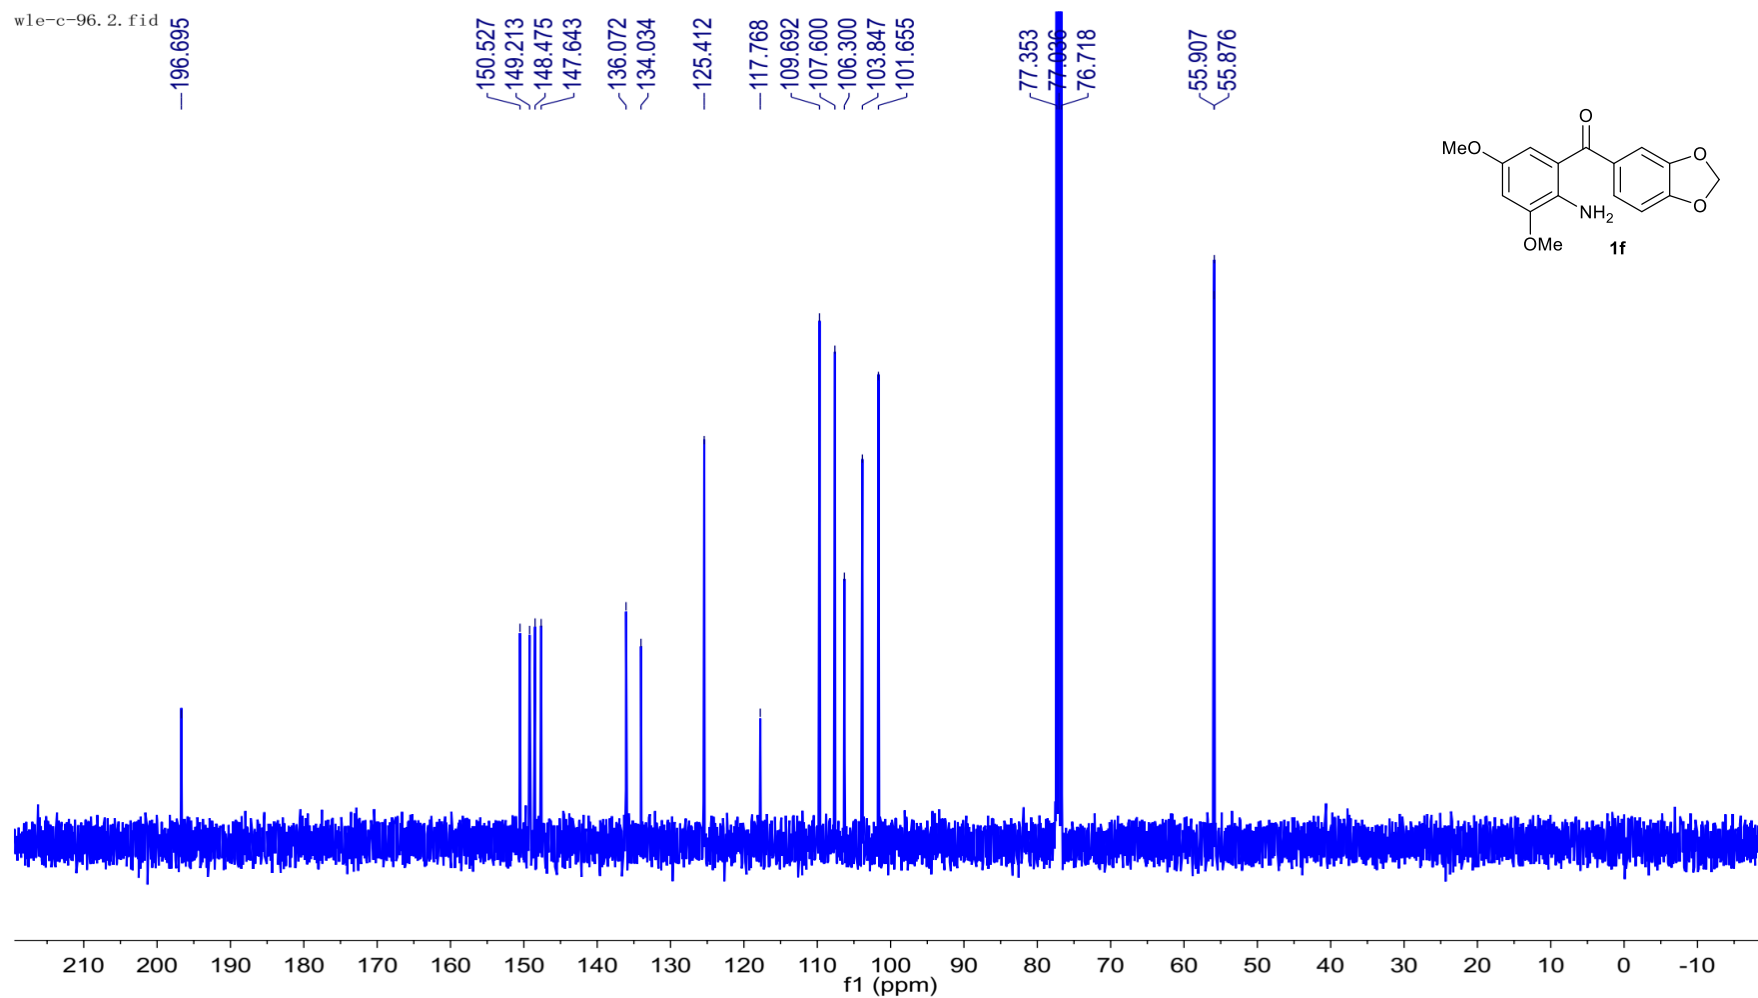

<sup>1</sup>H NMR Spectrum (400 MHz, Chloroform-d) of **1g**

wle-c-66. 1. fid

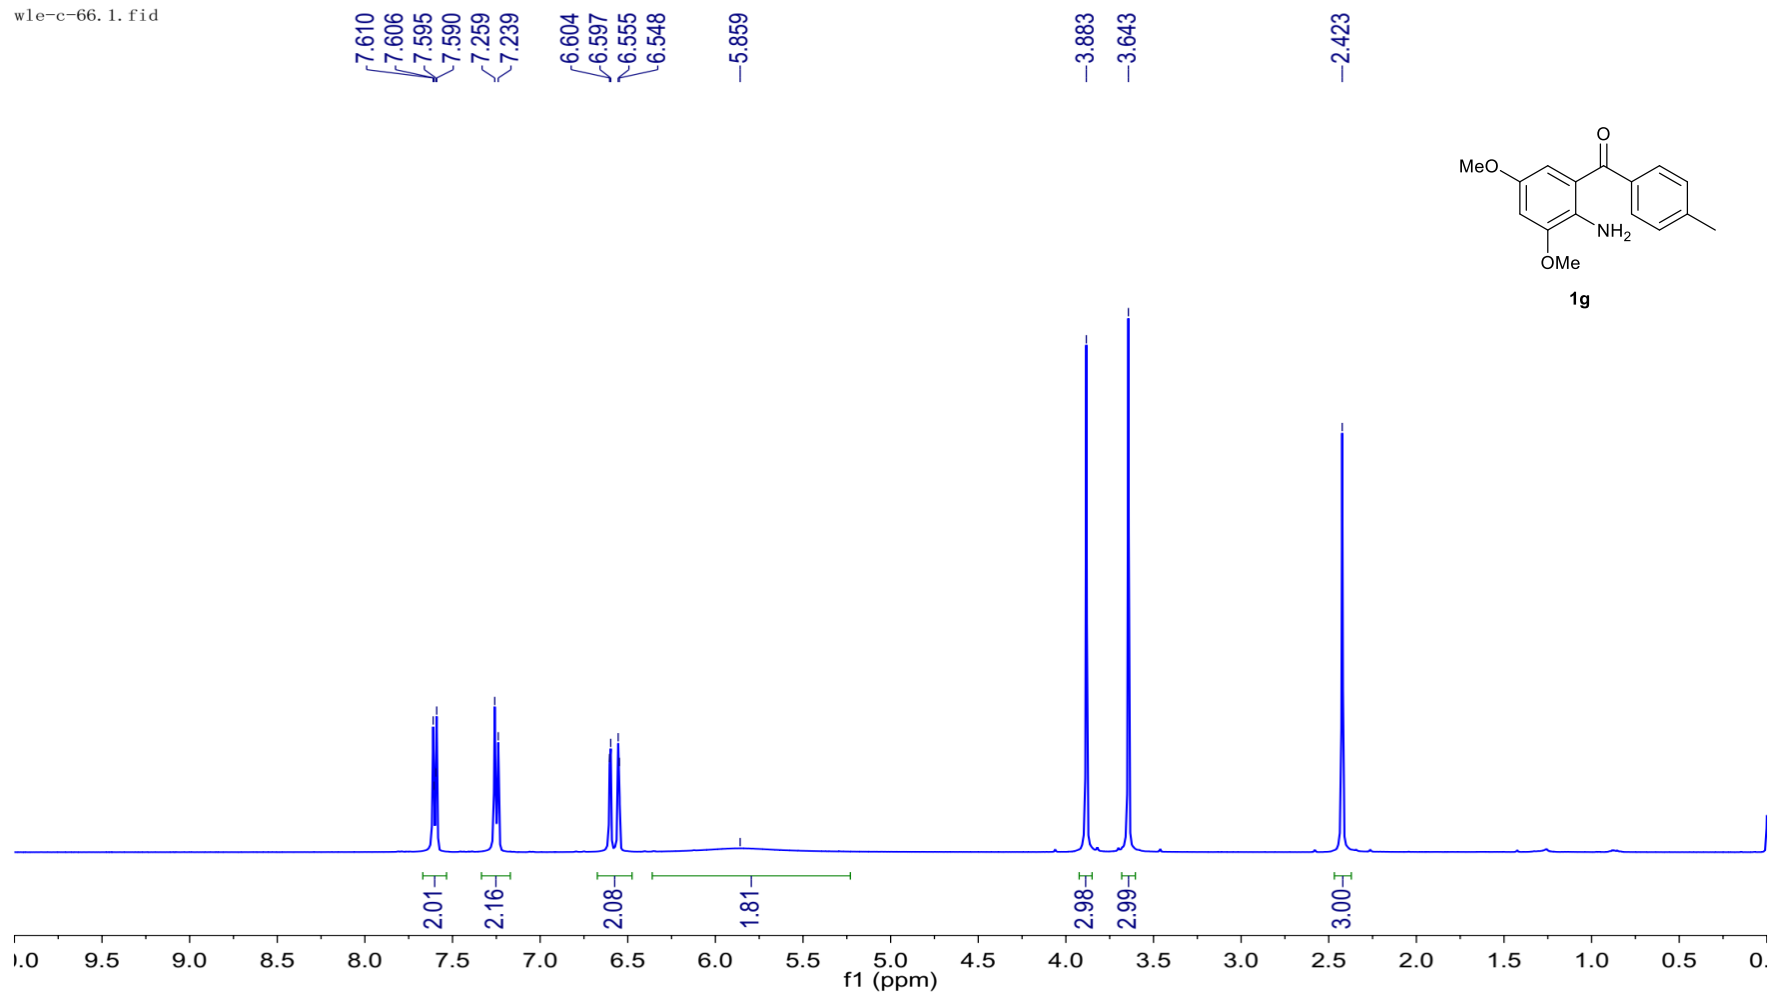

$^{13}\text{C}$   $\{^1\text{H}\}$  NMR Spectrum (101 MHz, Chloroform-d) of **1g**

wle-c-66. 2. fid

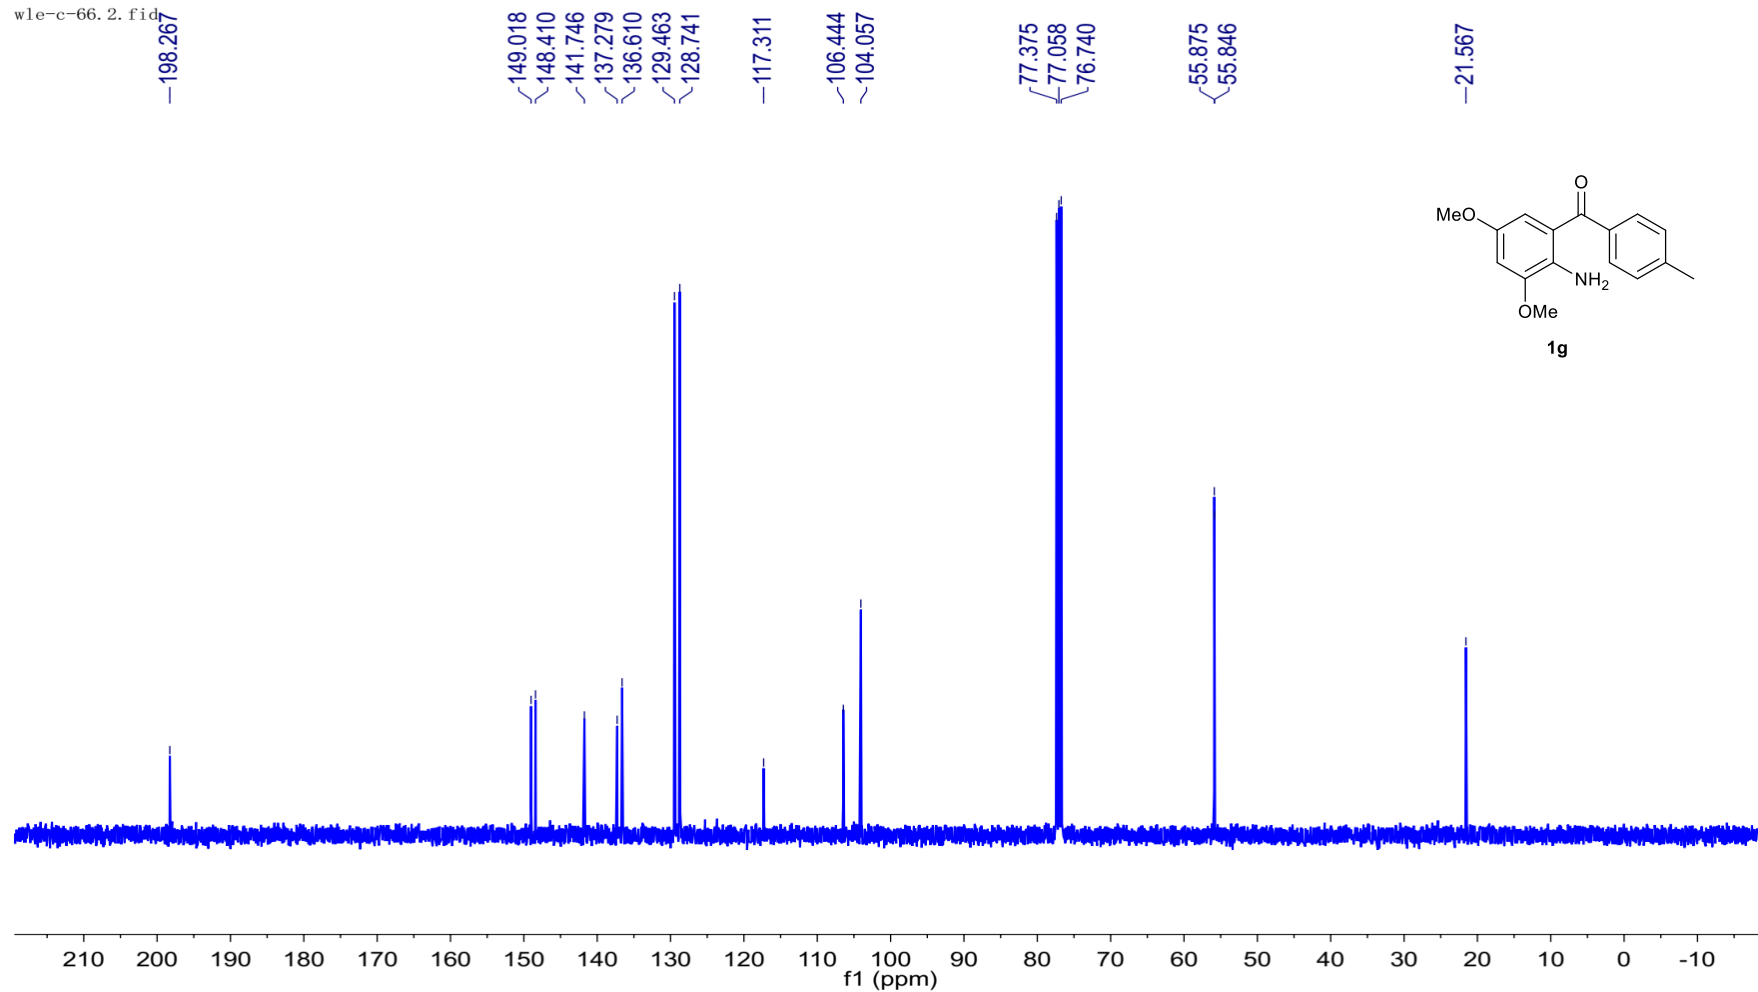

<sup>1</sup>H NMR Spectrum (600 MHz, Chloroform-d) of **1h**

ht-a-36.1.fid

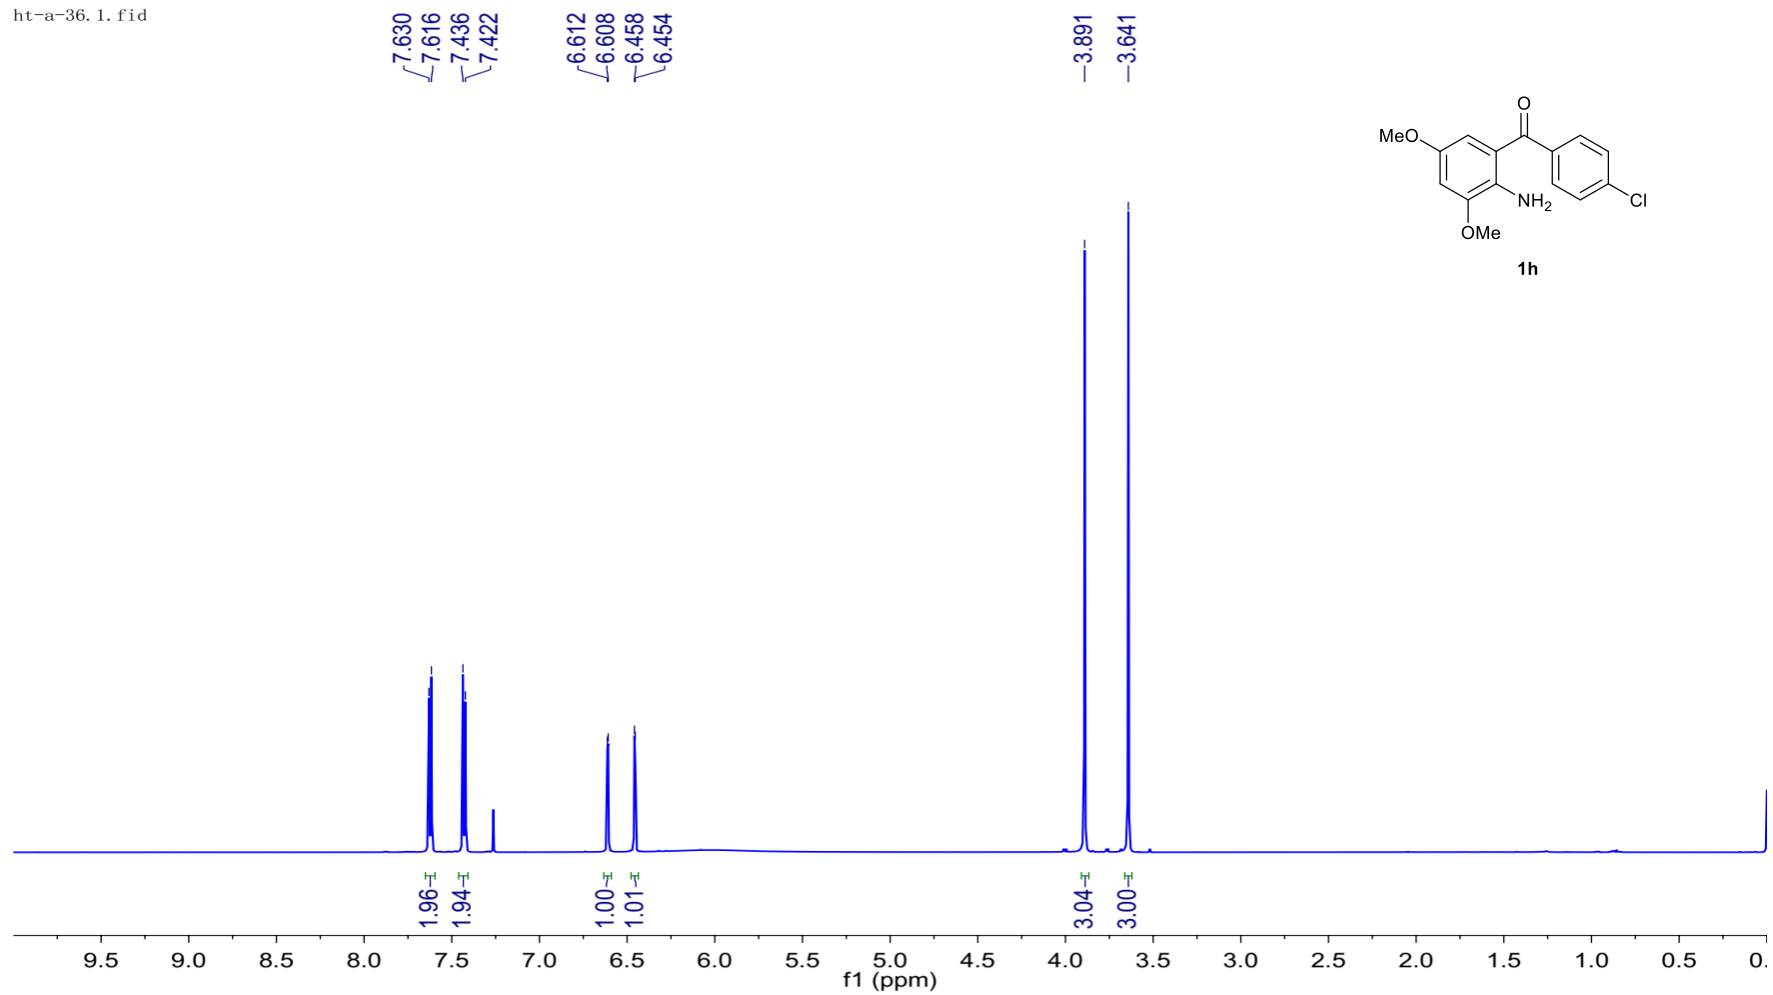



$^{13}\text{C}$   $\{^1\text{H}\}$  NMR Spectrum (101 MHz, Chloroform-d) of **1h**

ht-a-36-c.1.fid

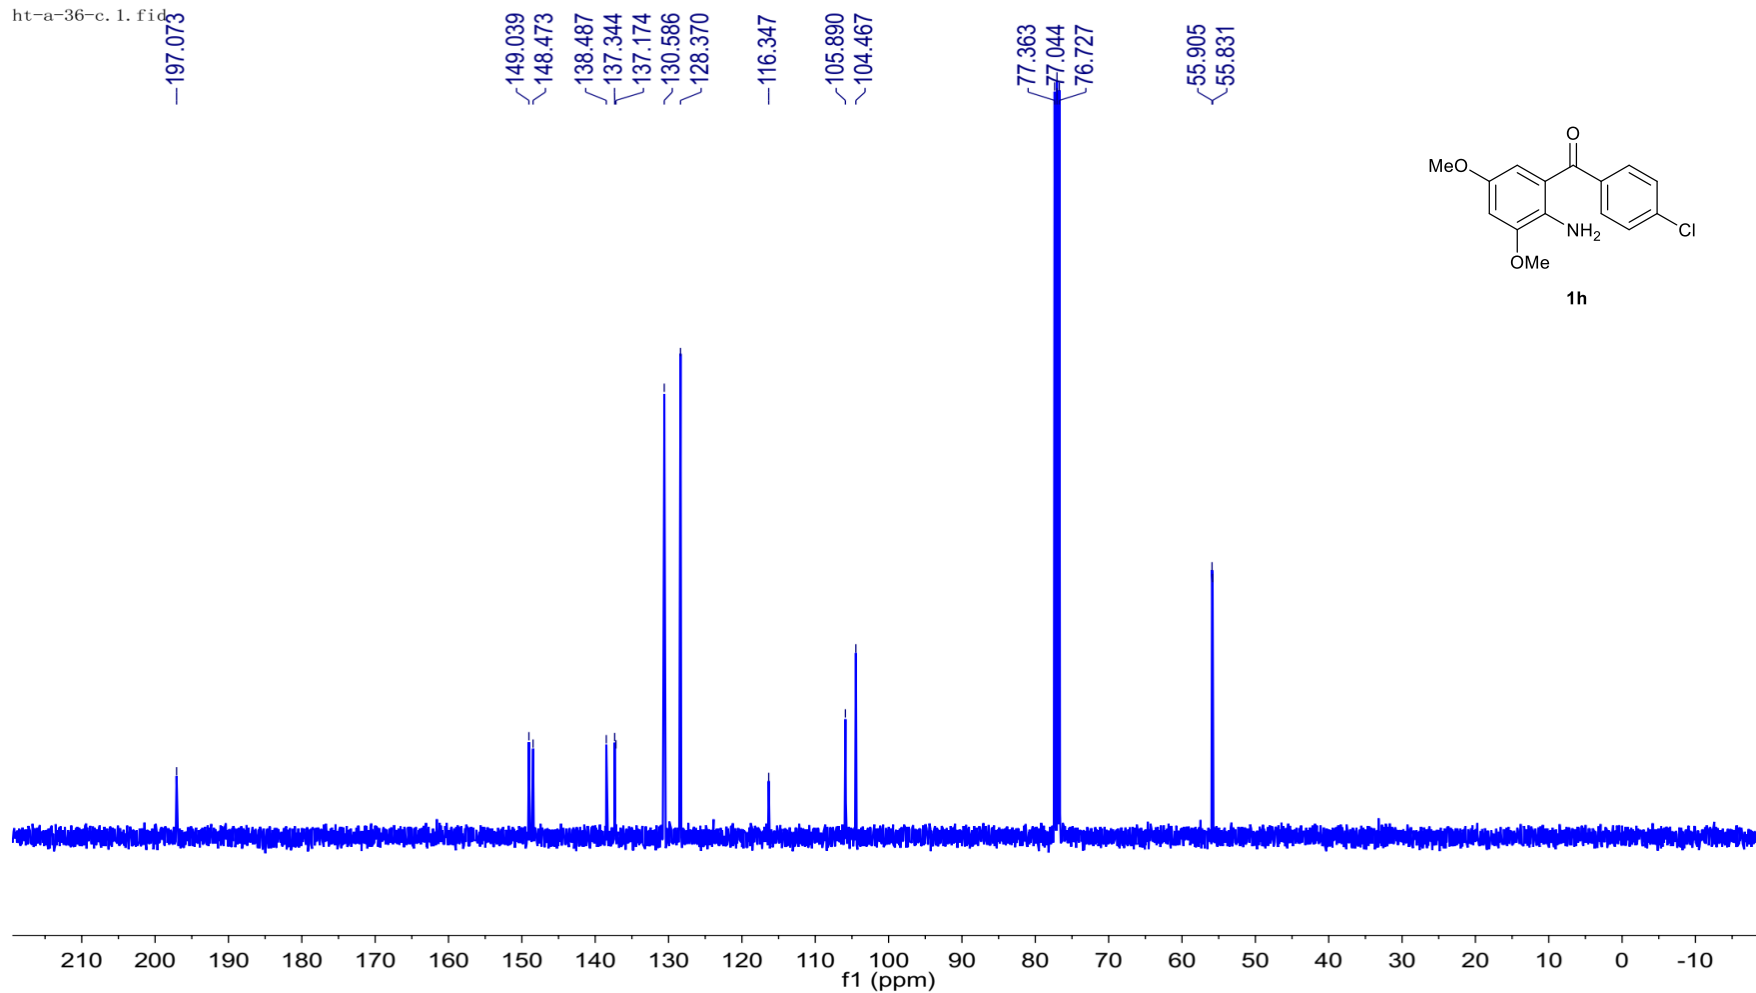

<sup>1</sup>H NMR Spectrum (400 MHz, Chloroform-d) of **1i**

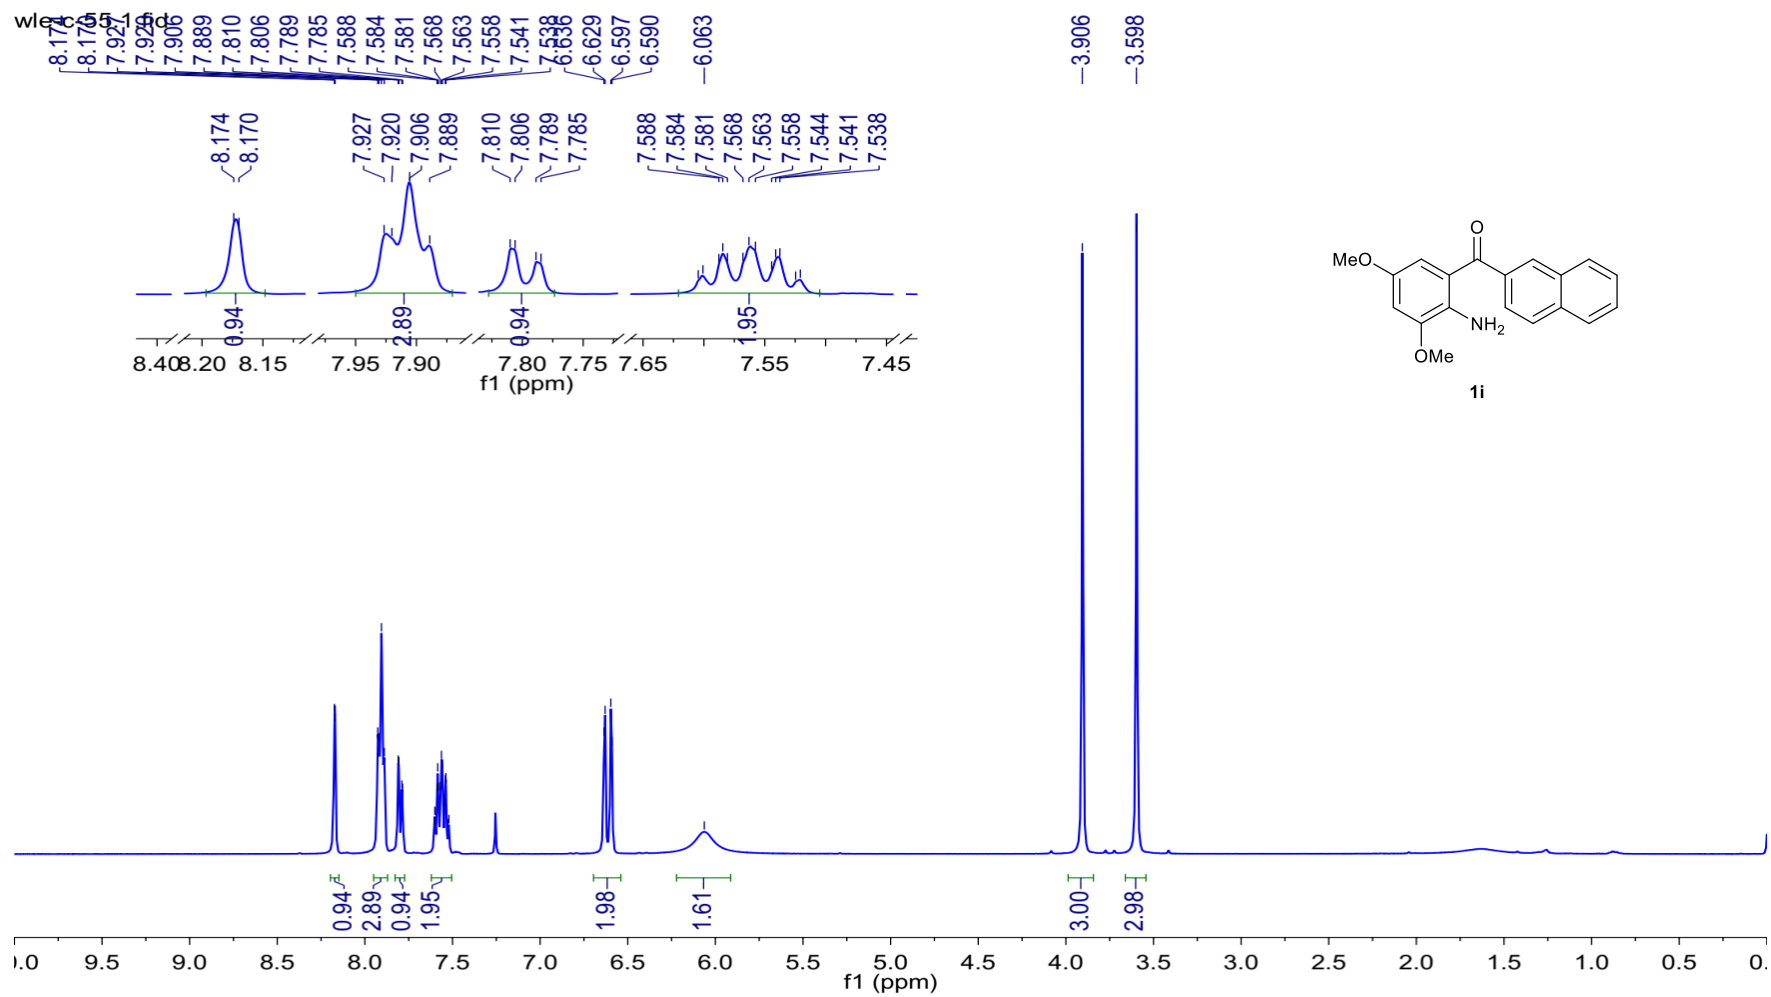

$^{13}\text{C}$   $\{^1\text{H}\}$  NMR Spectrum (101 MHz, Chloroform-d) of **1i**

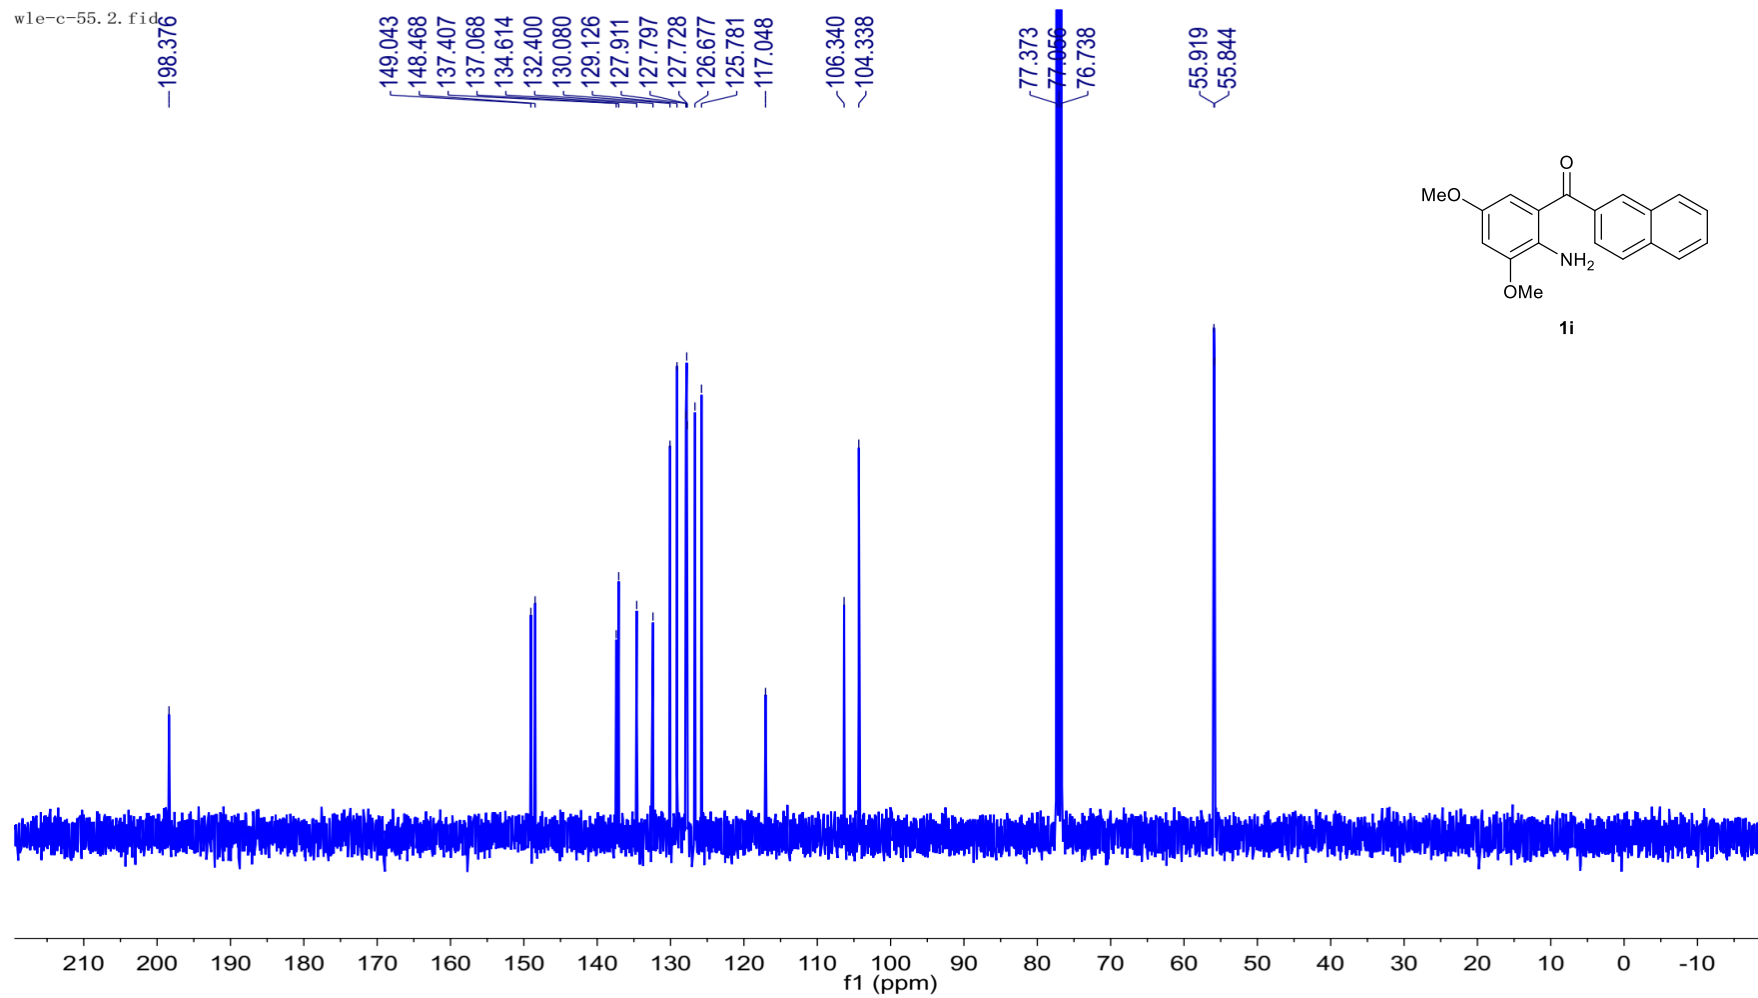

# 1H NMR Spectrum (600 MHz, Chloroform-d) of 4a

wle-c-81-1.1.fid

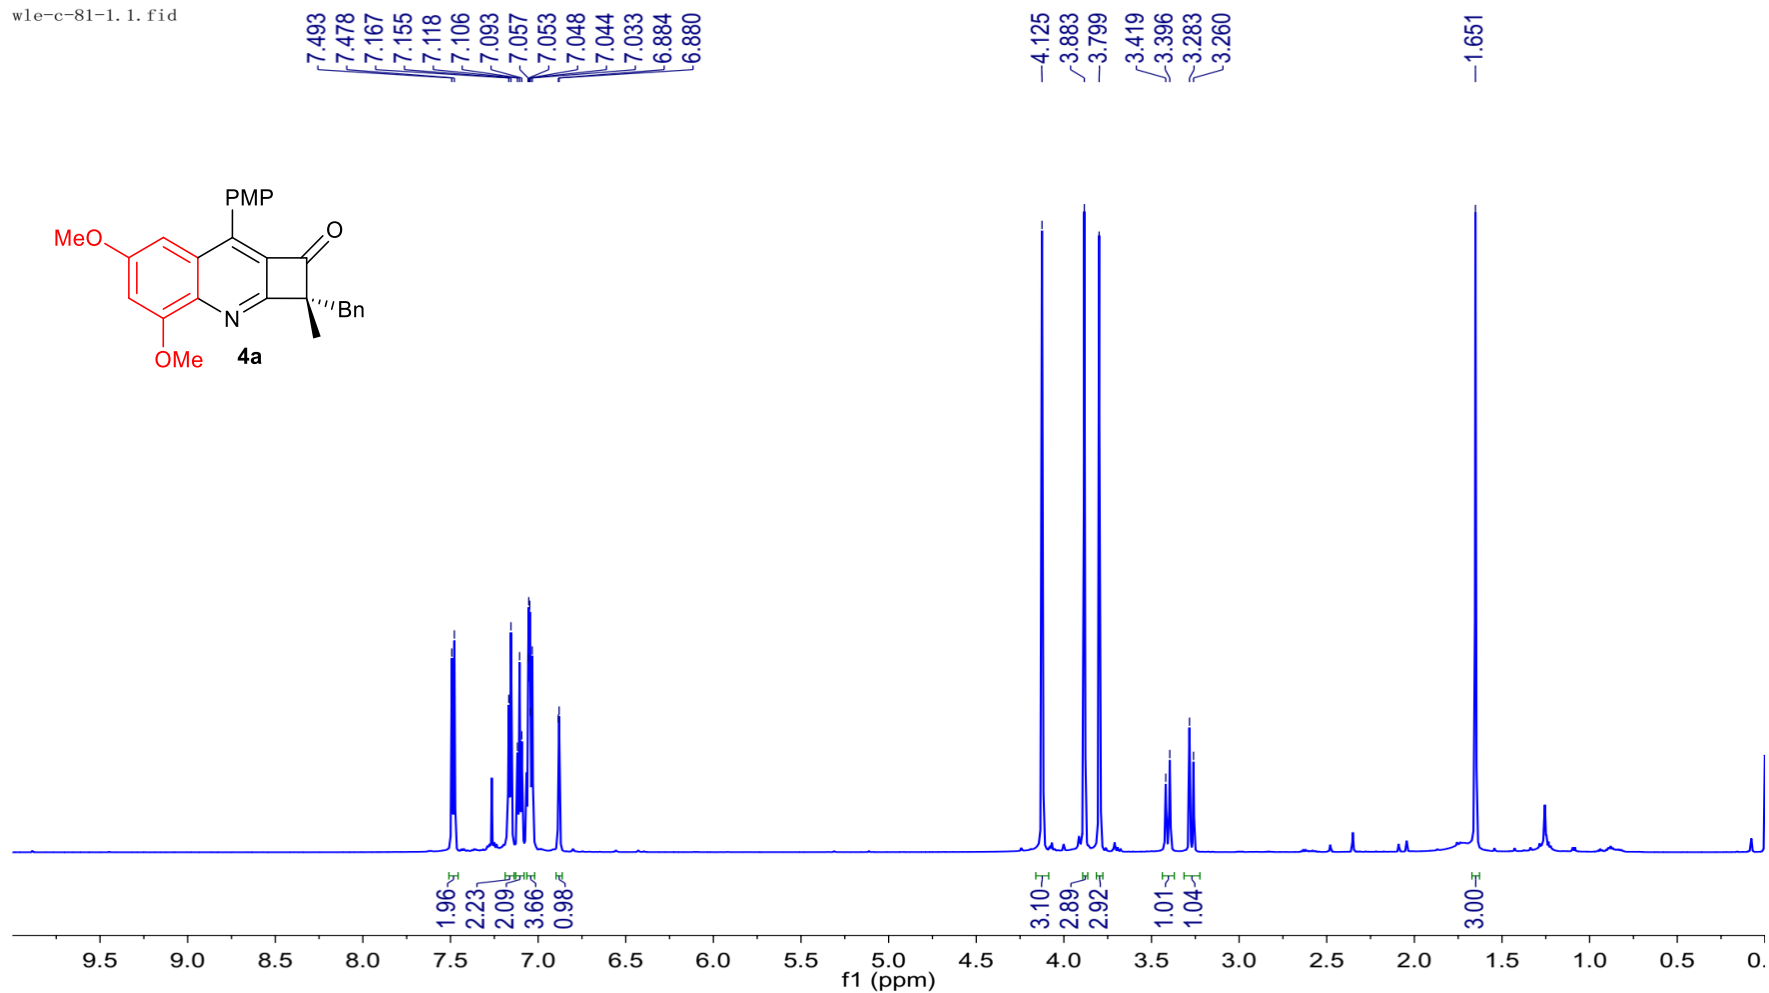

$^{13}\text{C}$  { $^1\text{H}$ } NMR Spectrum (101 MHz, Chloroform-d) of **4a**

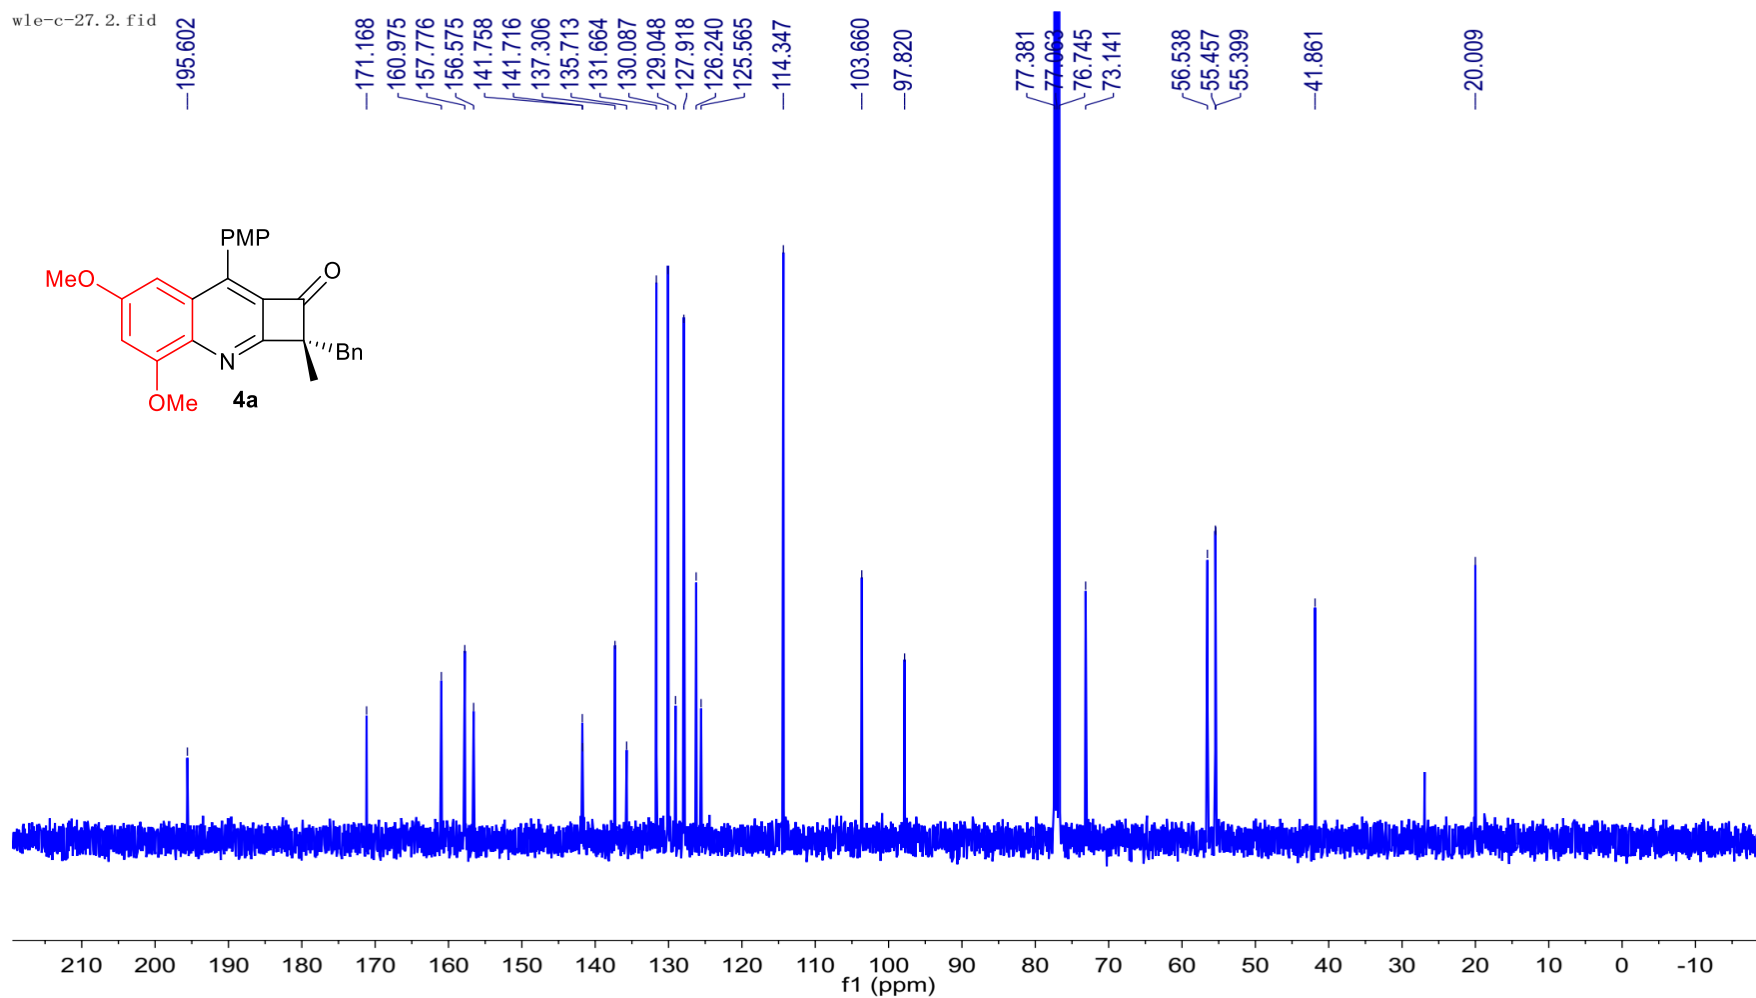

<sup>1</sup>H NMR Spectrum (600 MHz, Chloroform-d) of **4b**

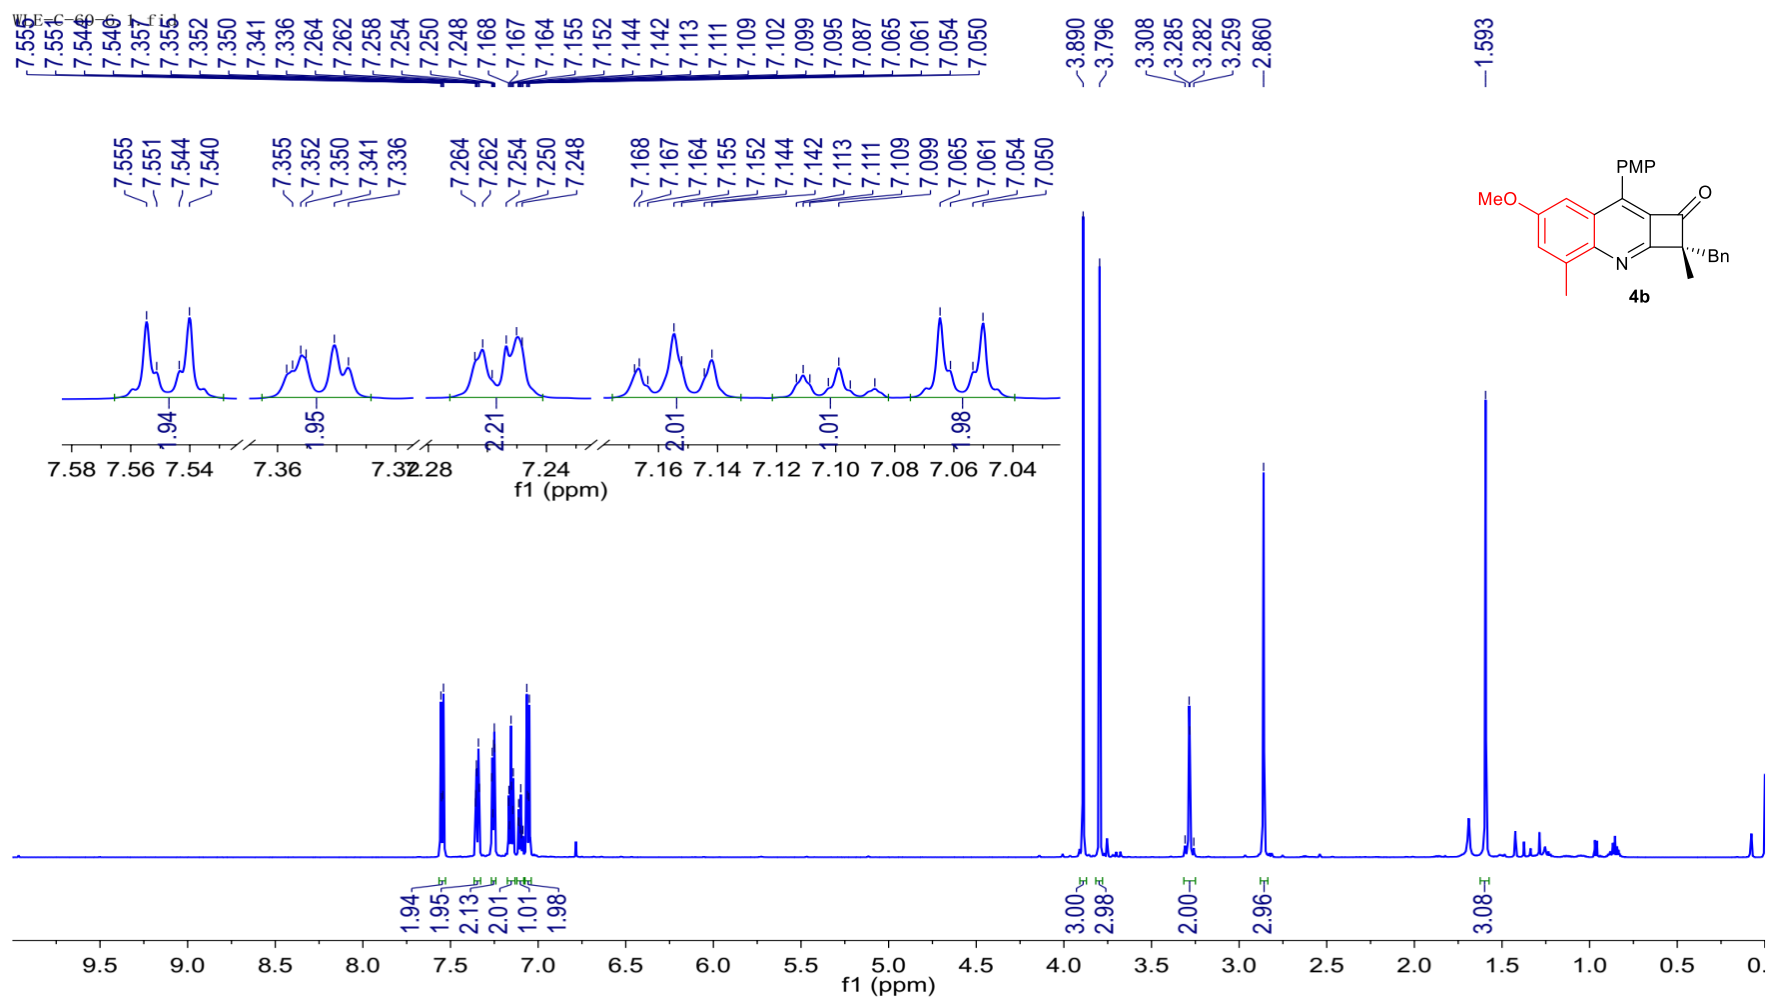

$^{13}\text{C}$   $\{^1\text{H}\}$  NMR Spectrum (101 MHz, Chloroform-d) of **4b**

w1e-c-60-6-c. 1. f1

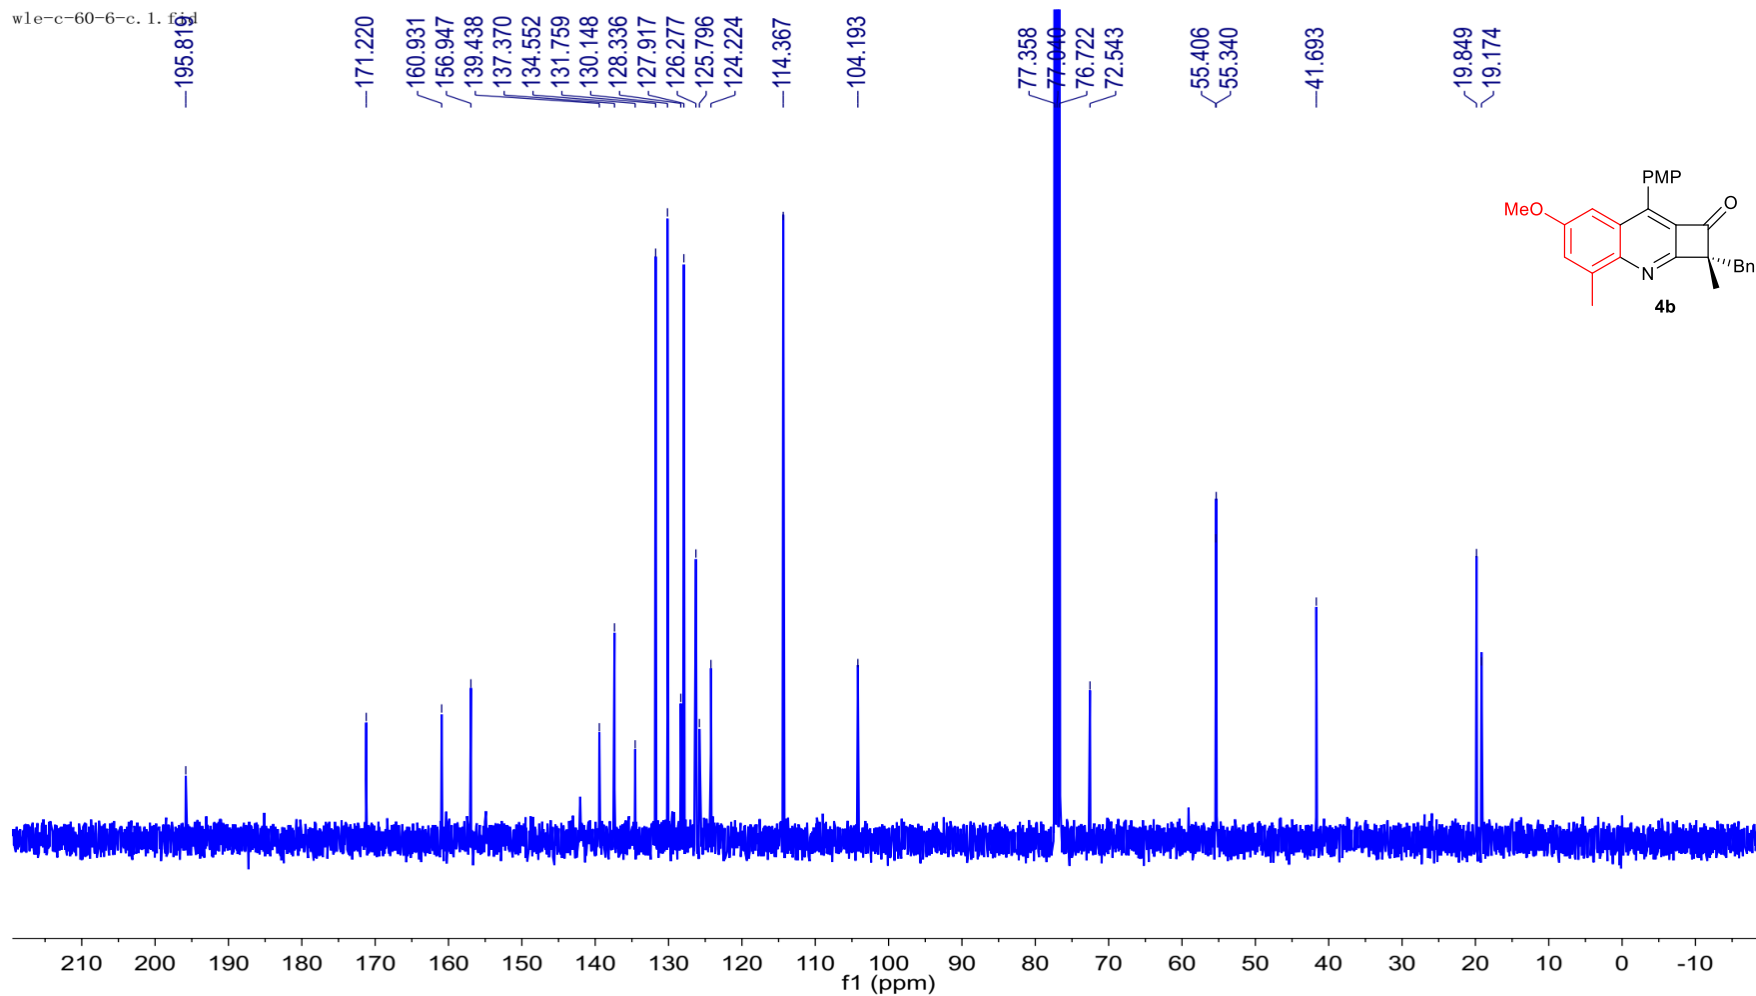

<sup>1</sup>H NMR Spectrum (400 MHz, Chloroform-d) of **4c**

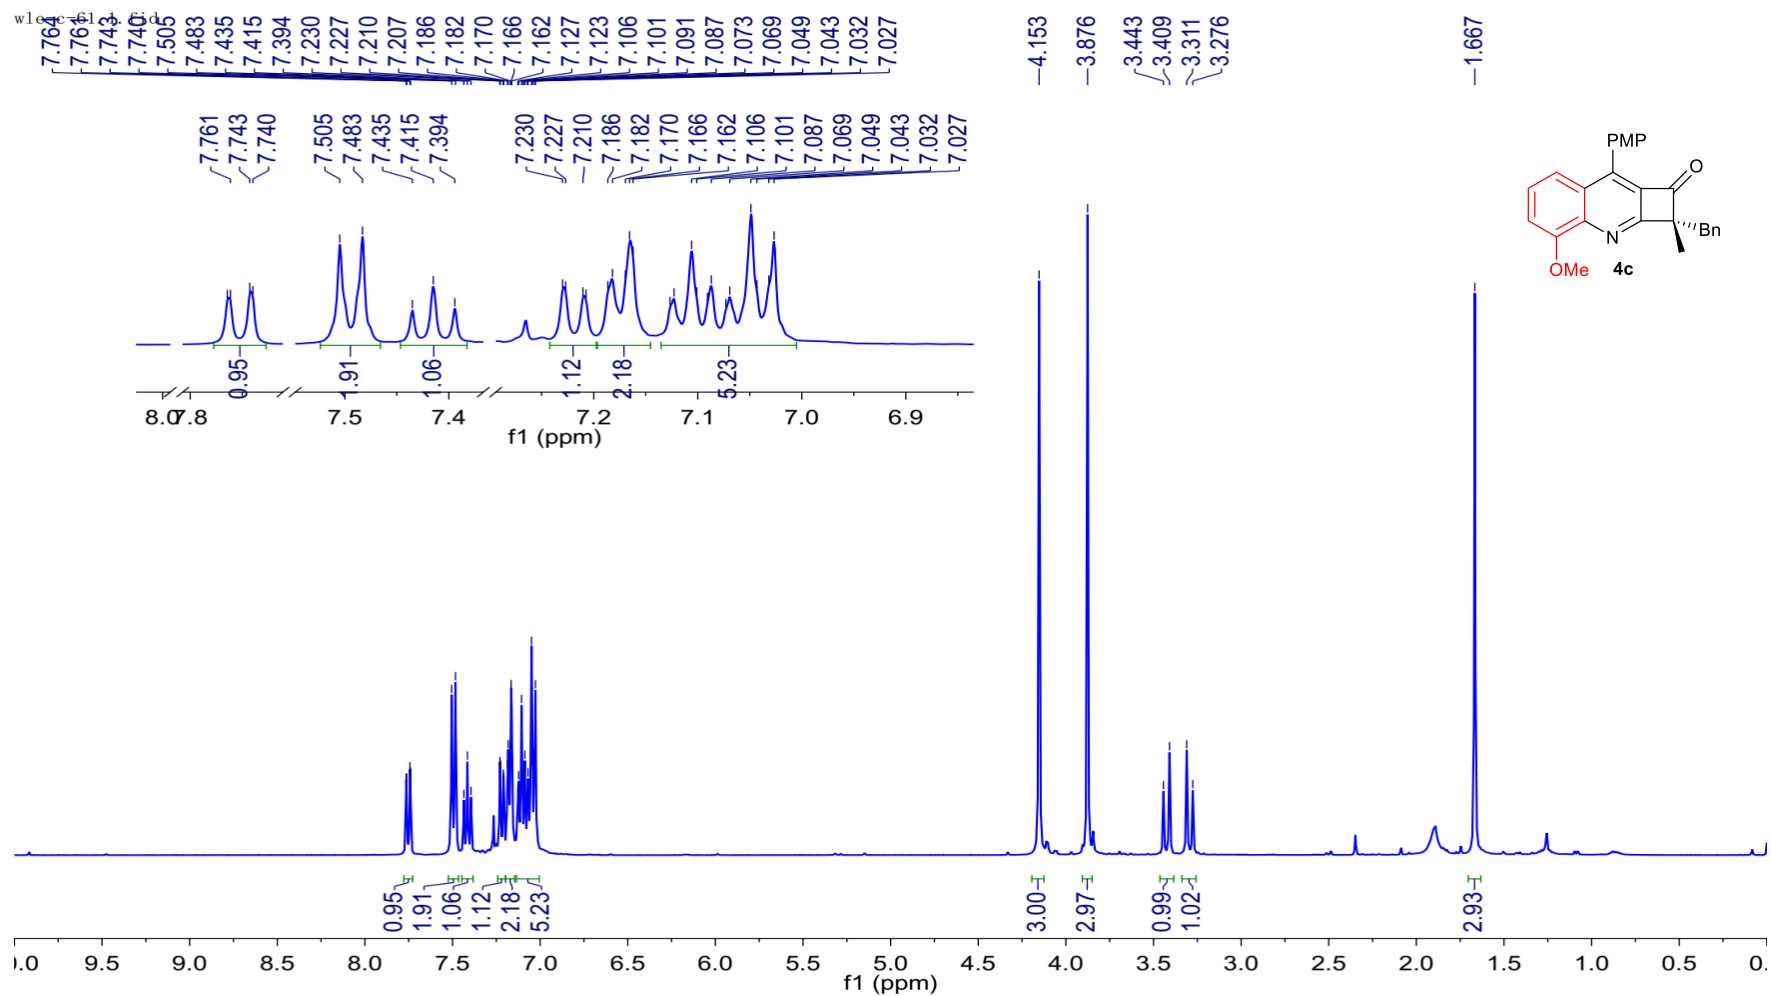



$^{13}\text{C}$   $\{^1\text{H}\}$  NMR Spectrum (101 MHz, Chloroform-d) of **4c**

wle-c-61-c. 1. fid

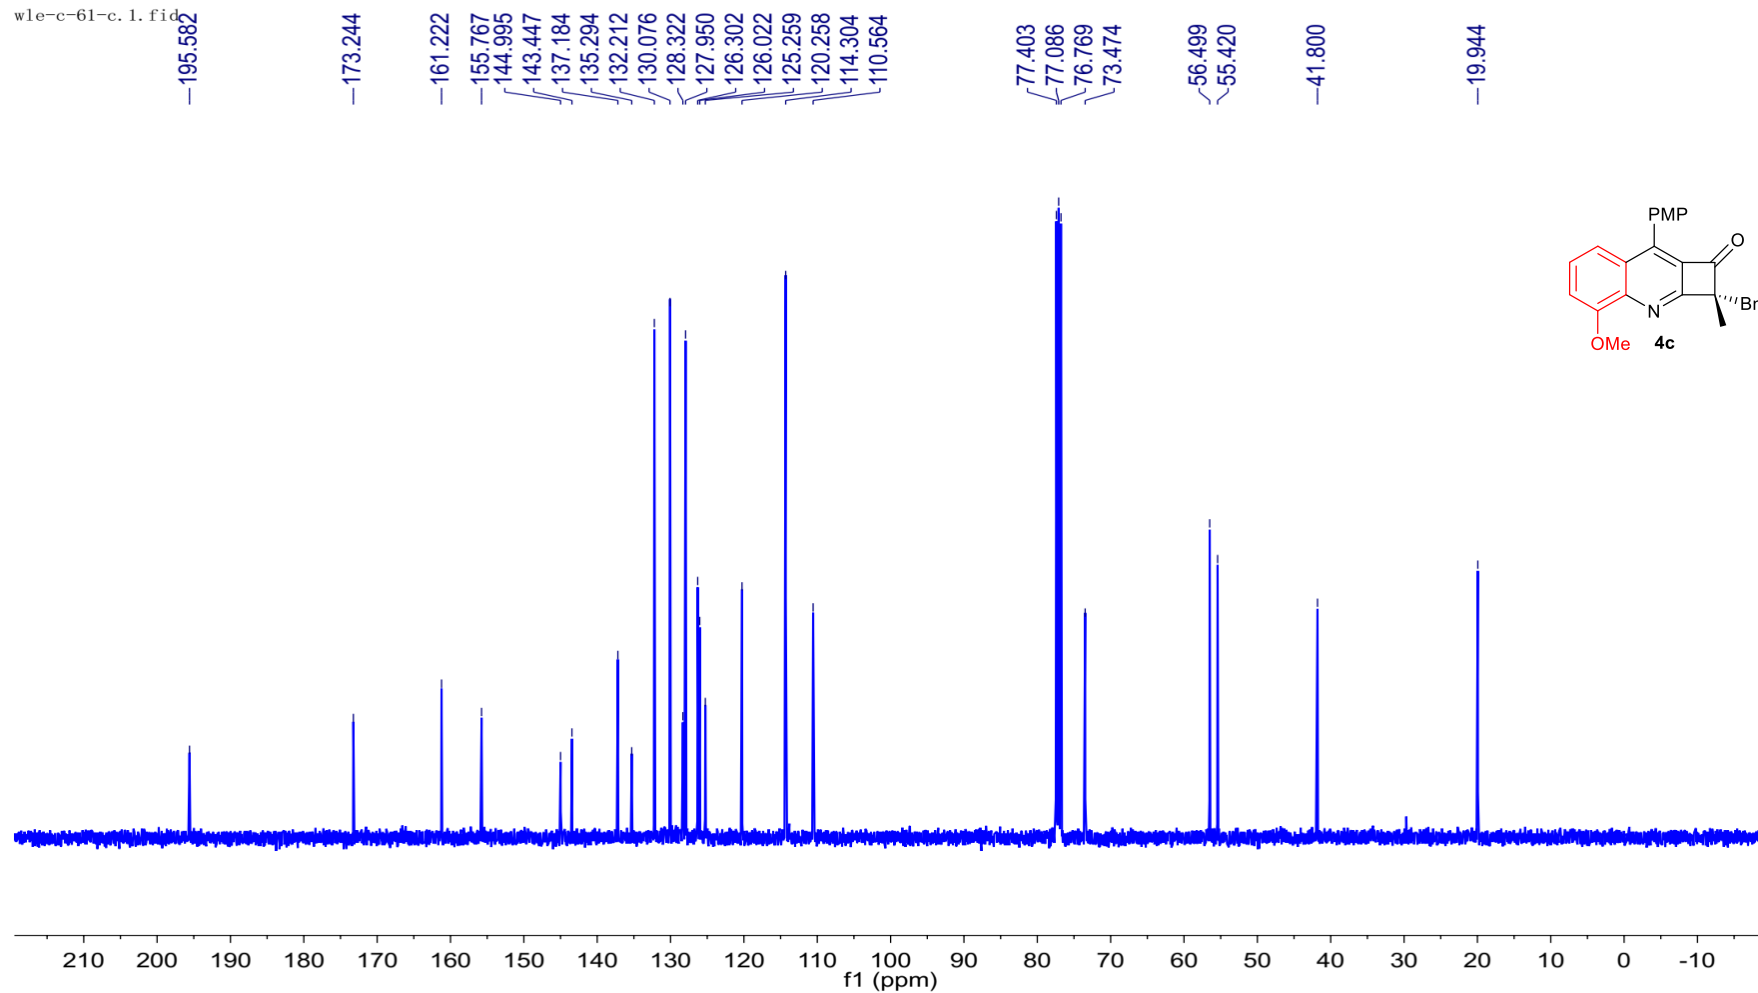

<sup>1</sup>H NMR Spectrum (600 MHz, Chloroform-d) of **4d**

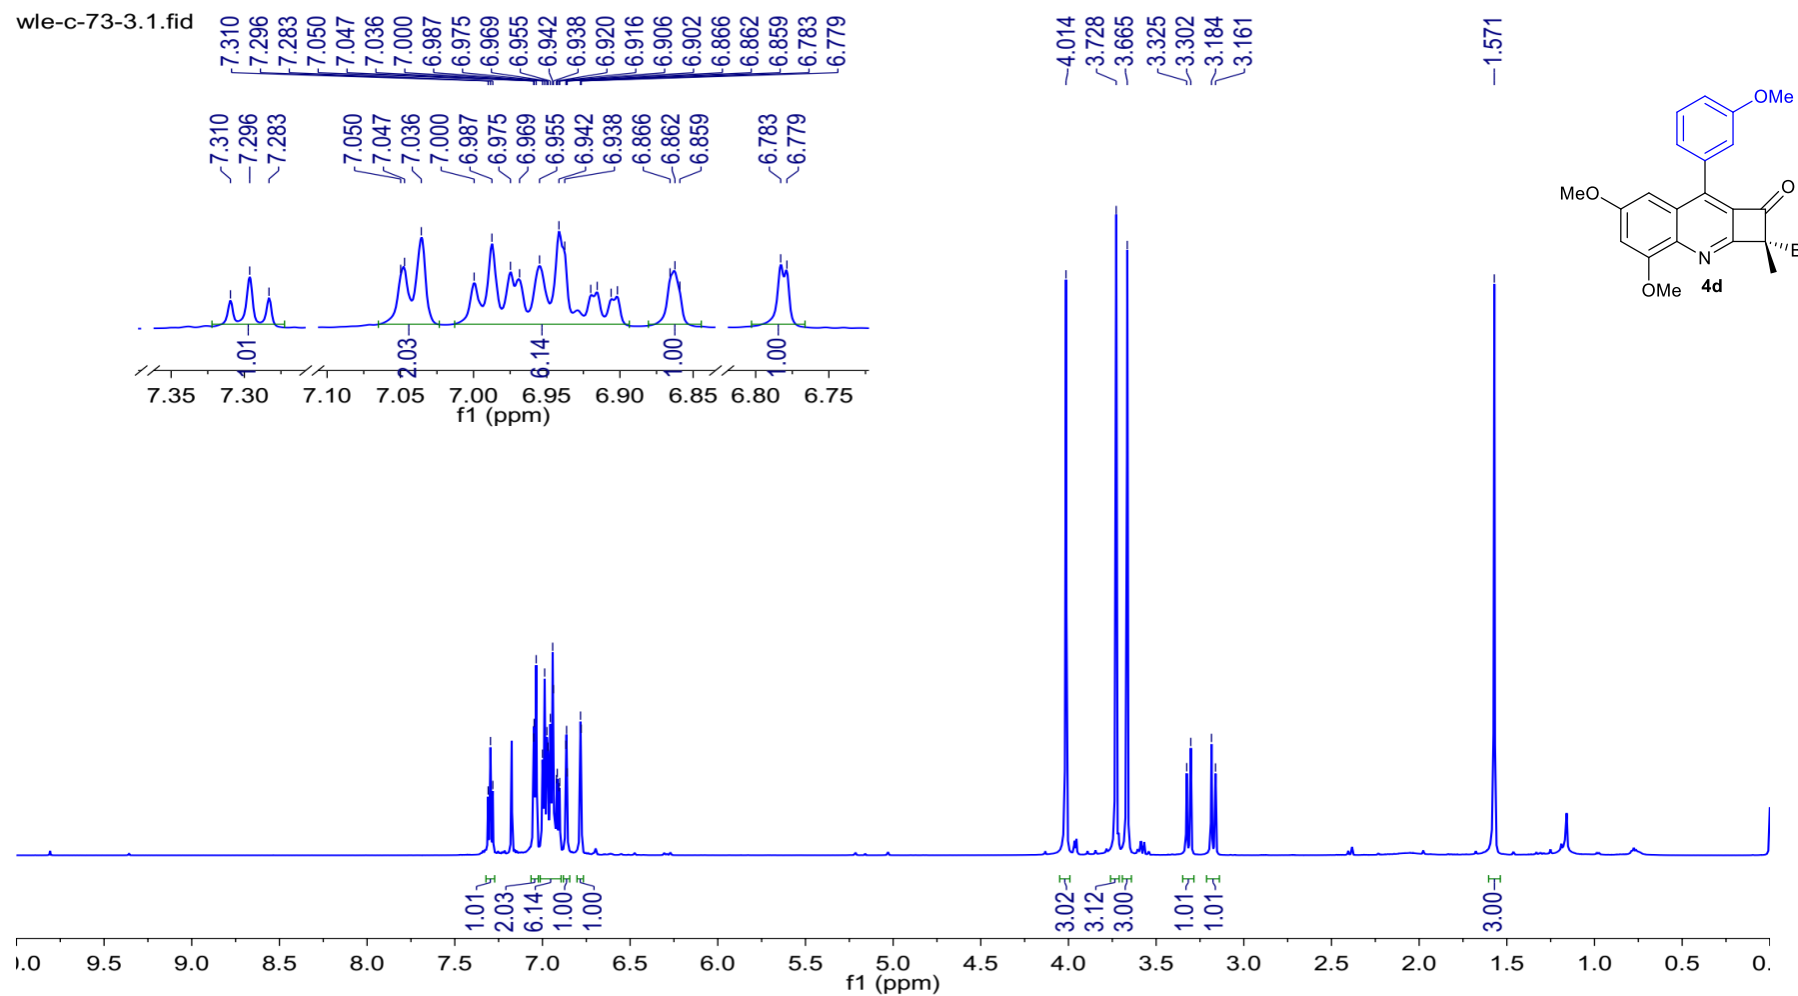

$^{13}\text{C}$   $\{^1\text{H}\}$  NMR Spectrum (101 MHz, Chloroform-d) of **4d**

w1e-c-73-3-c.1.f

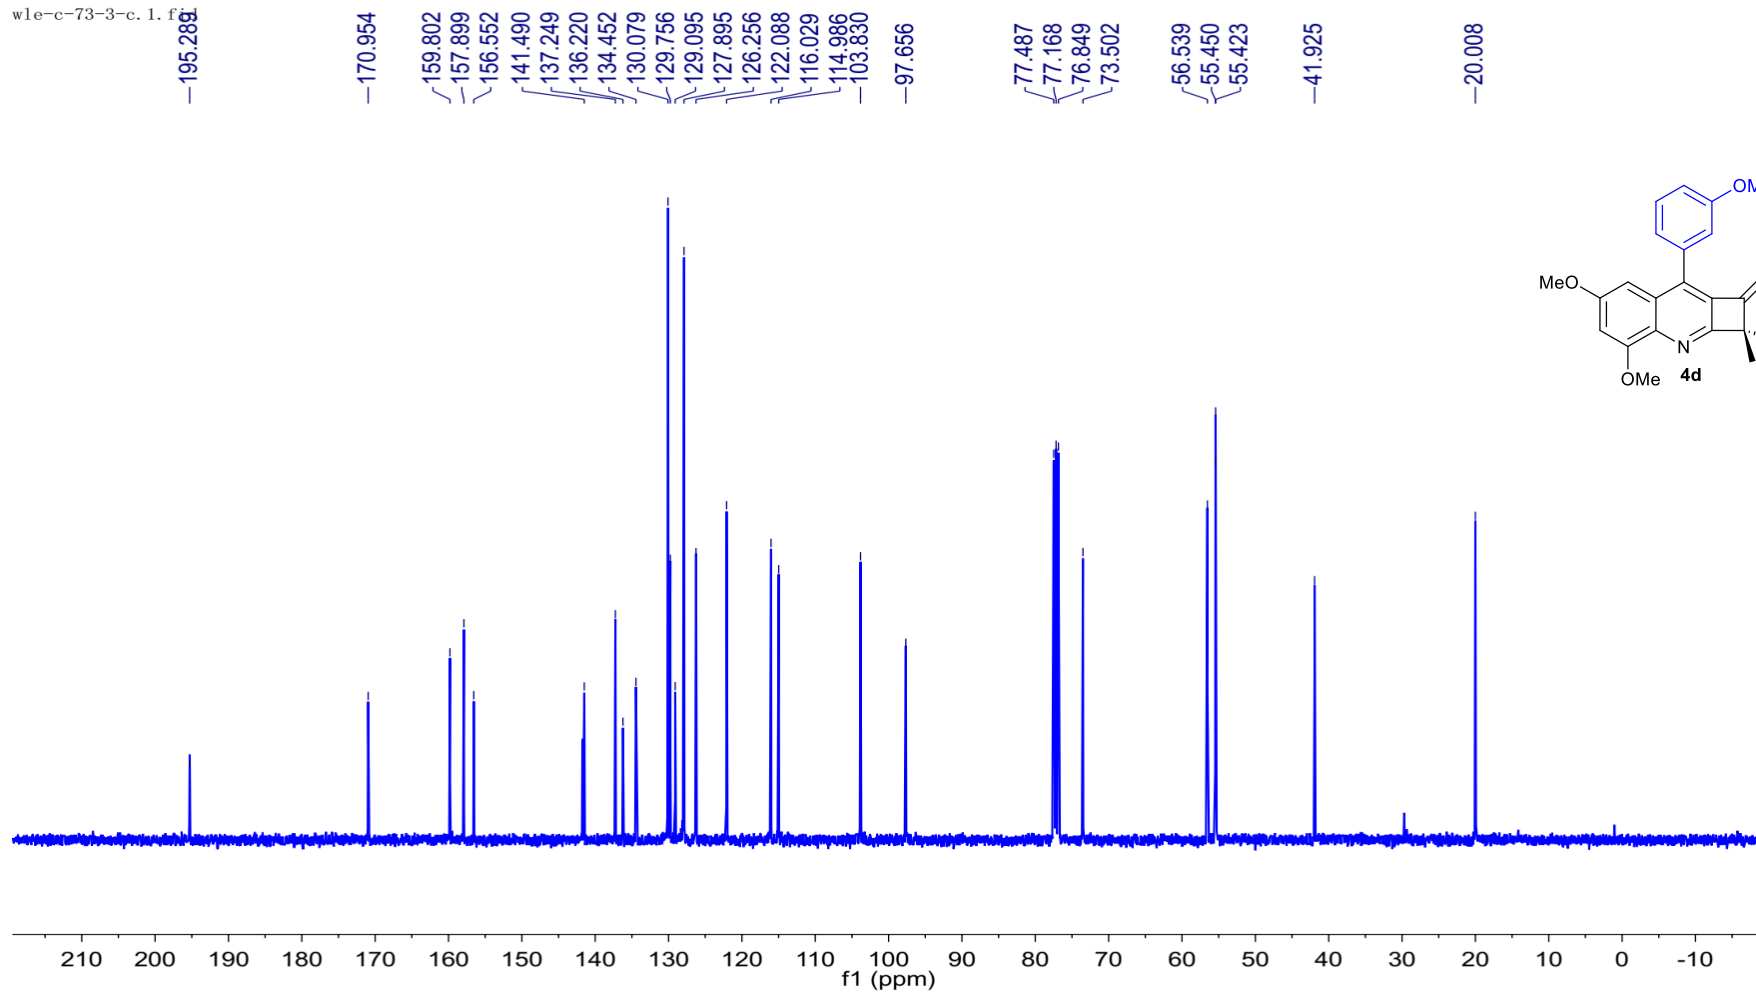

<sup>1</sup>H NMR Spectrum (600 MHz, Chloroform-d) of **4e**

WLE-C-62-5. 1. fid

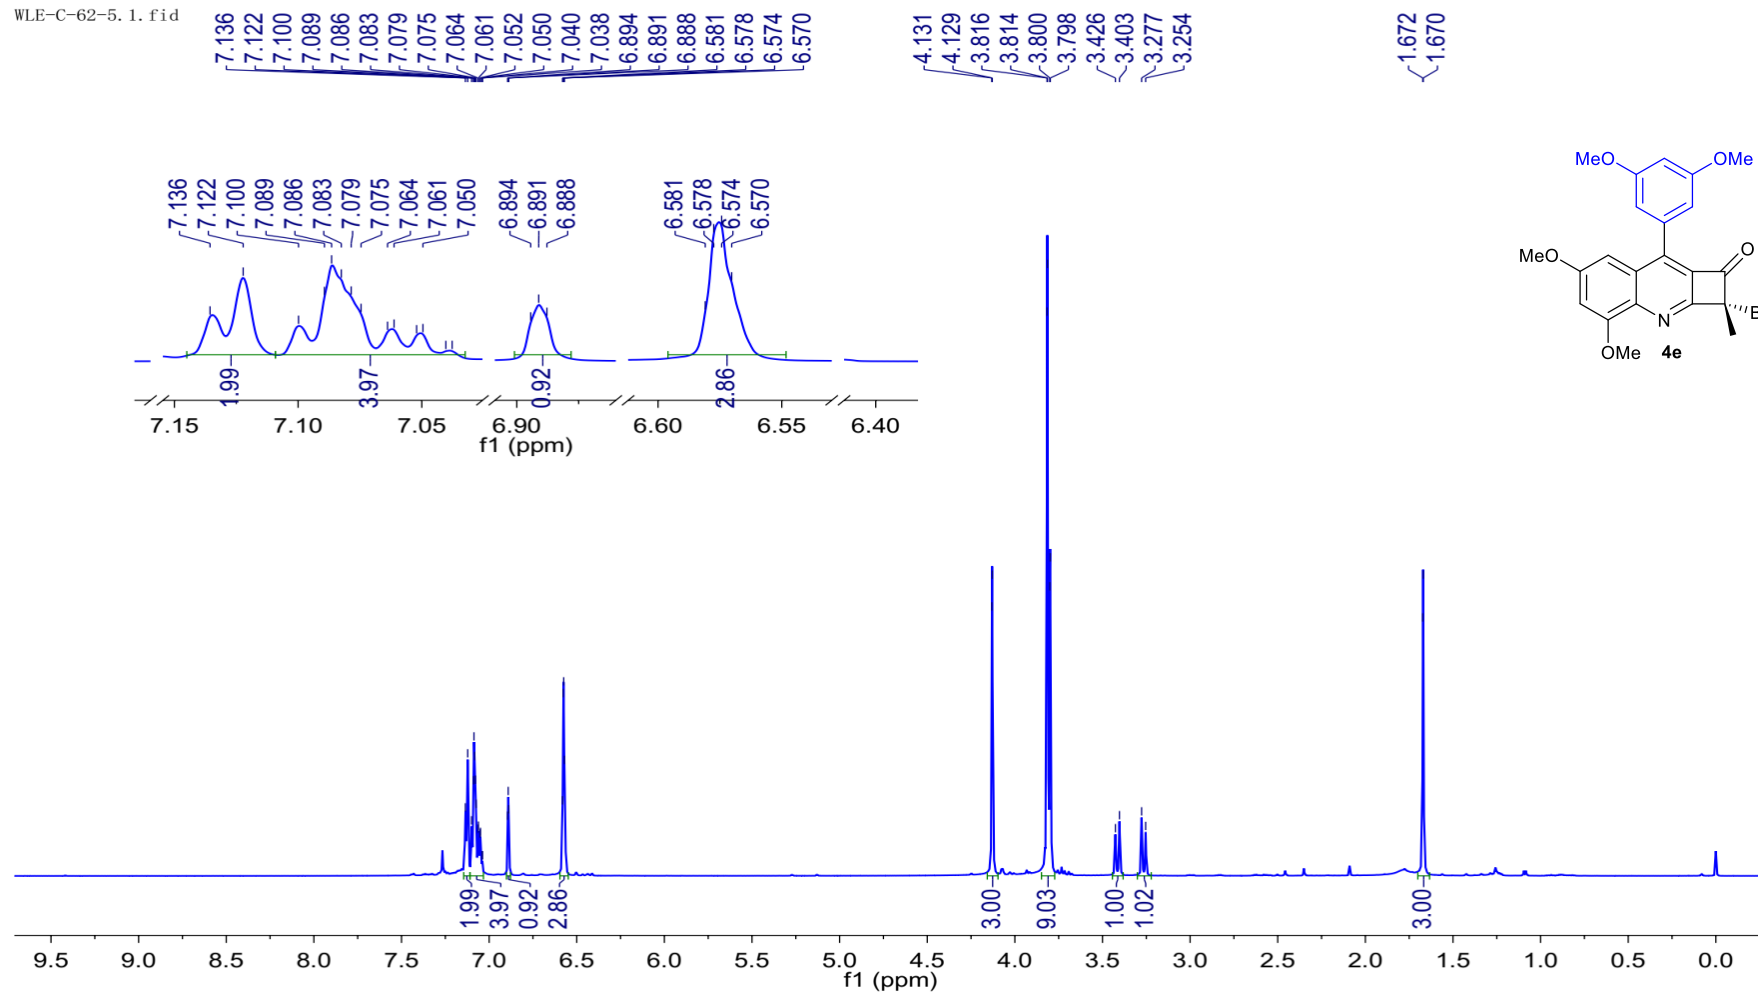

$^{13}\text{C}$   $\{^1\text{H}\}$  NMR Spectrum (101 MHz, Chloroform-d) of **4e**

w1e-c-62-5-c.1.f2

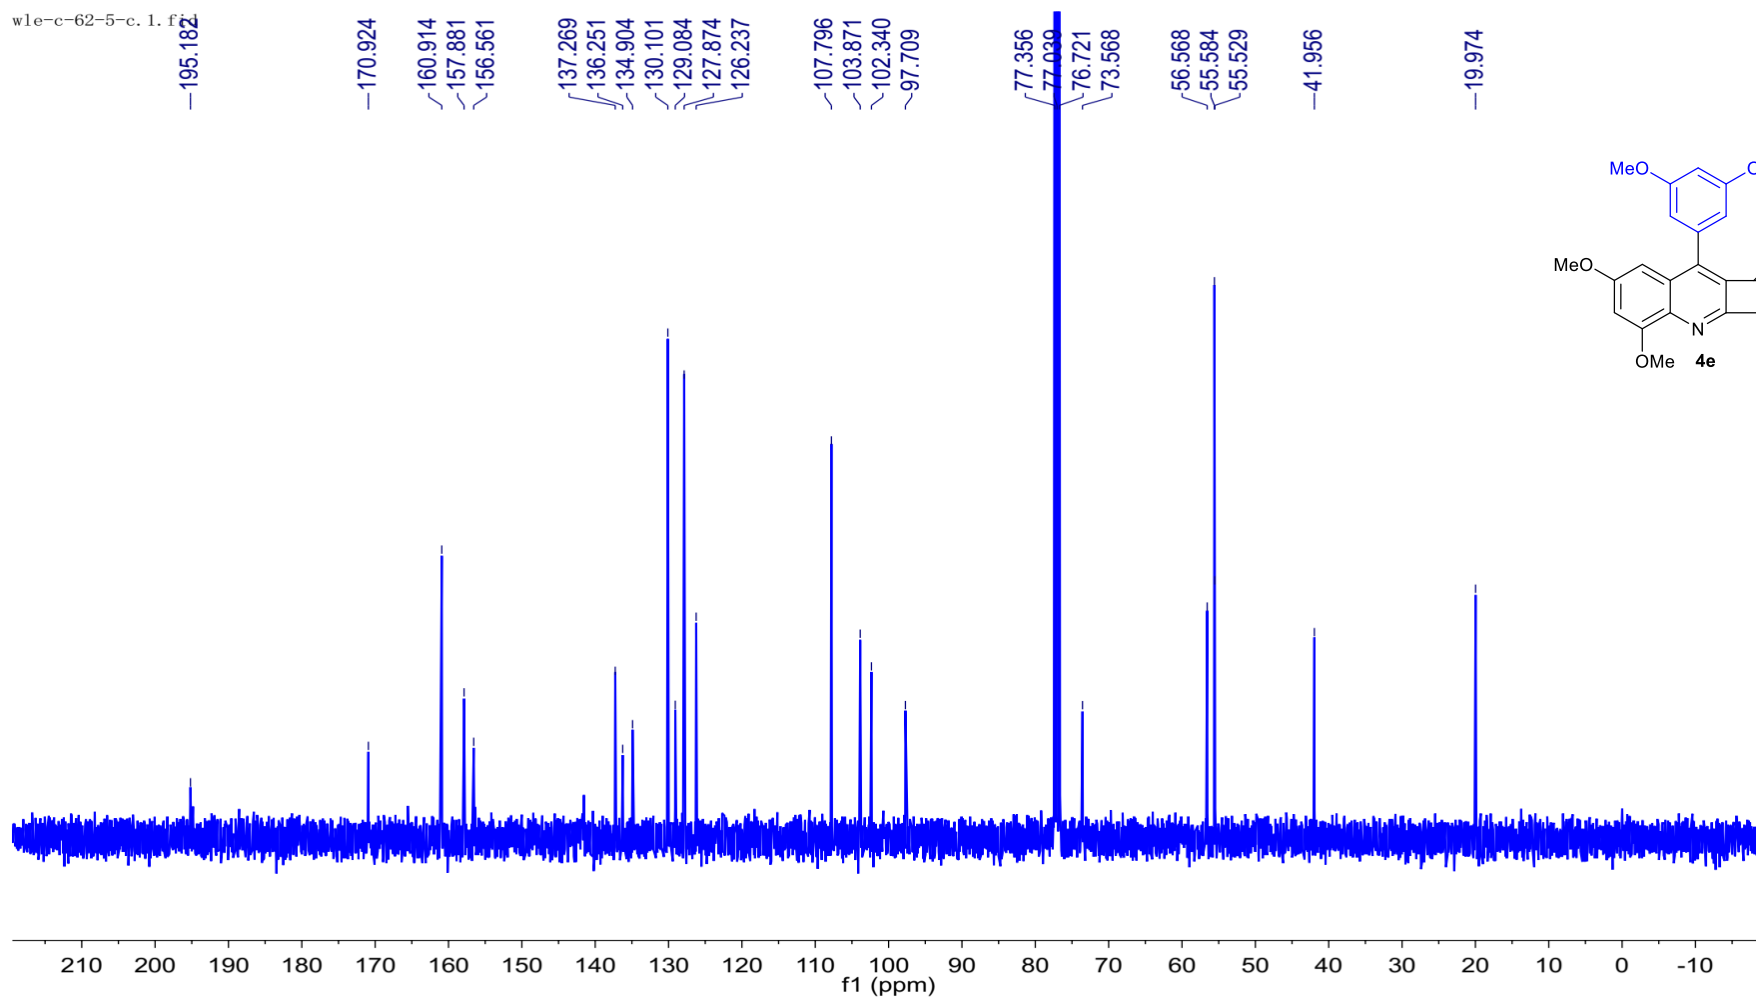

<sup>1</sup>H NMR Spectrum (400 MHz, Chloroform-d) of **4f**

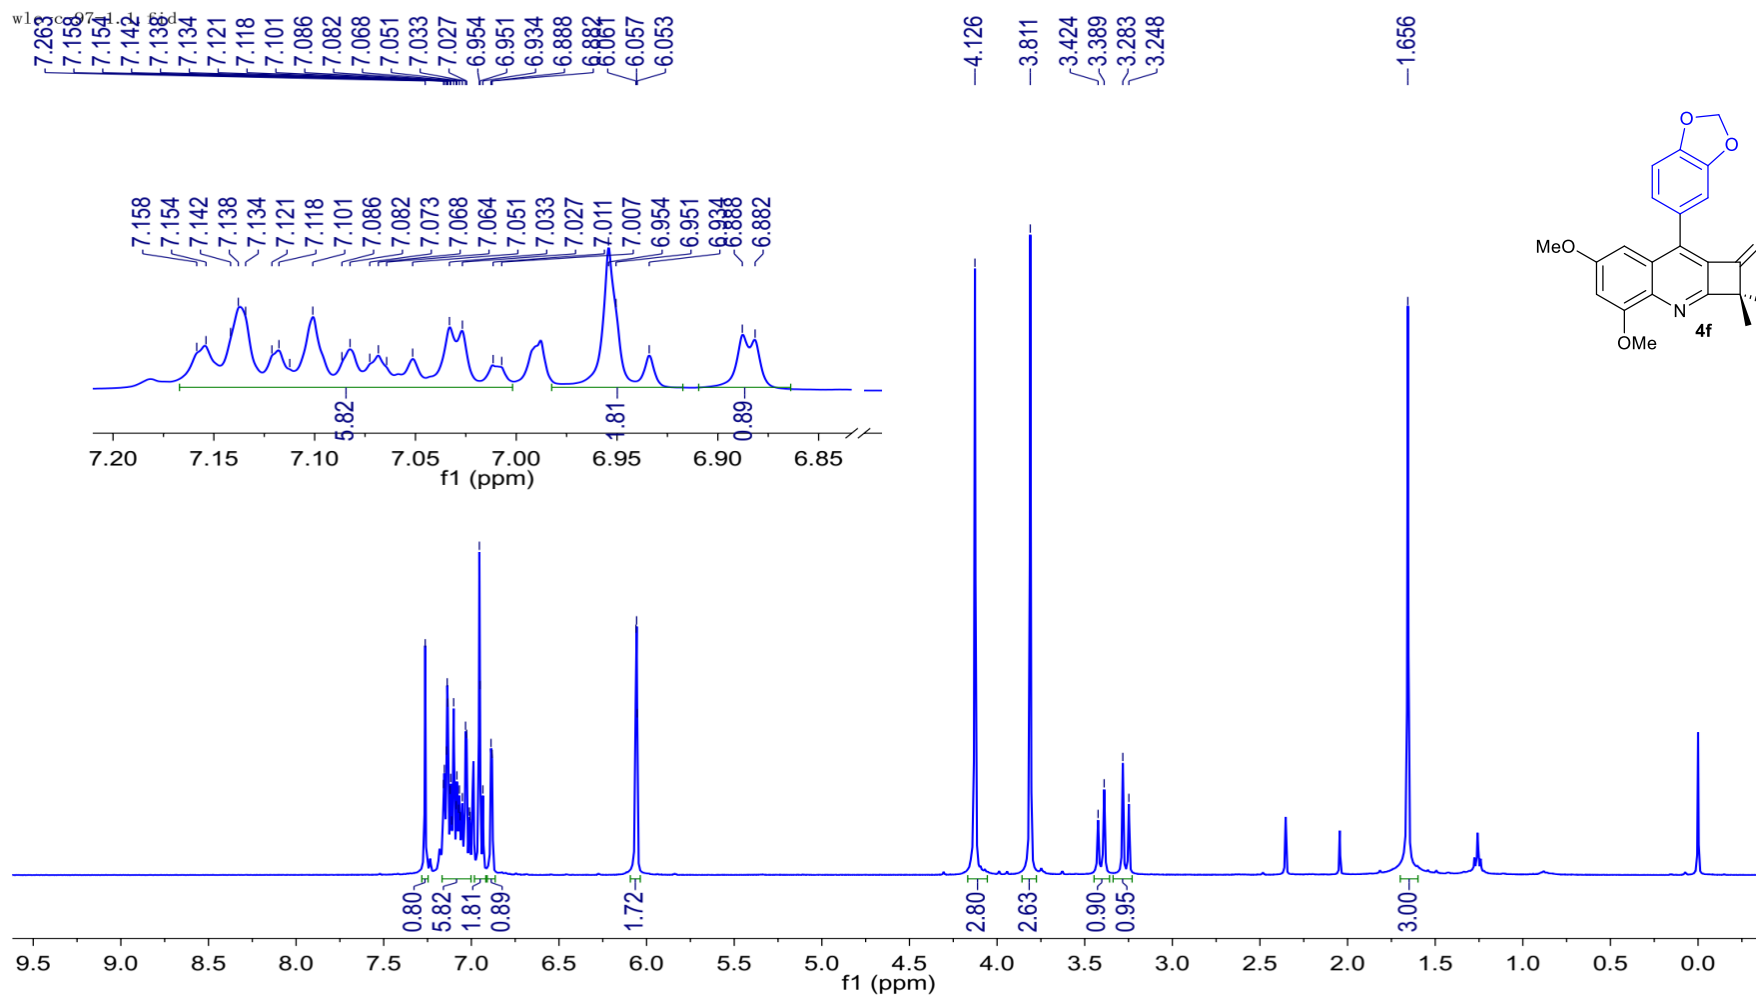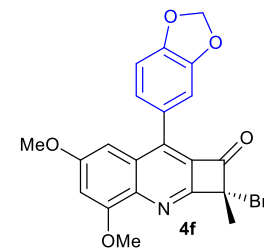

$^{13}\text{C}$   $\{^1\text{H}\}$  NMR Spectrum (101 MHz, Chloroform-d) of **4f**

wle-c-97-2. 11. f16

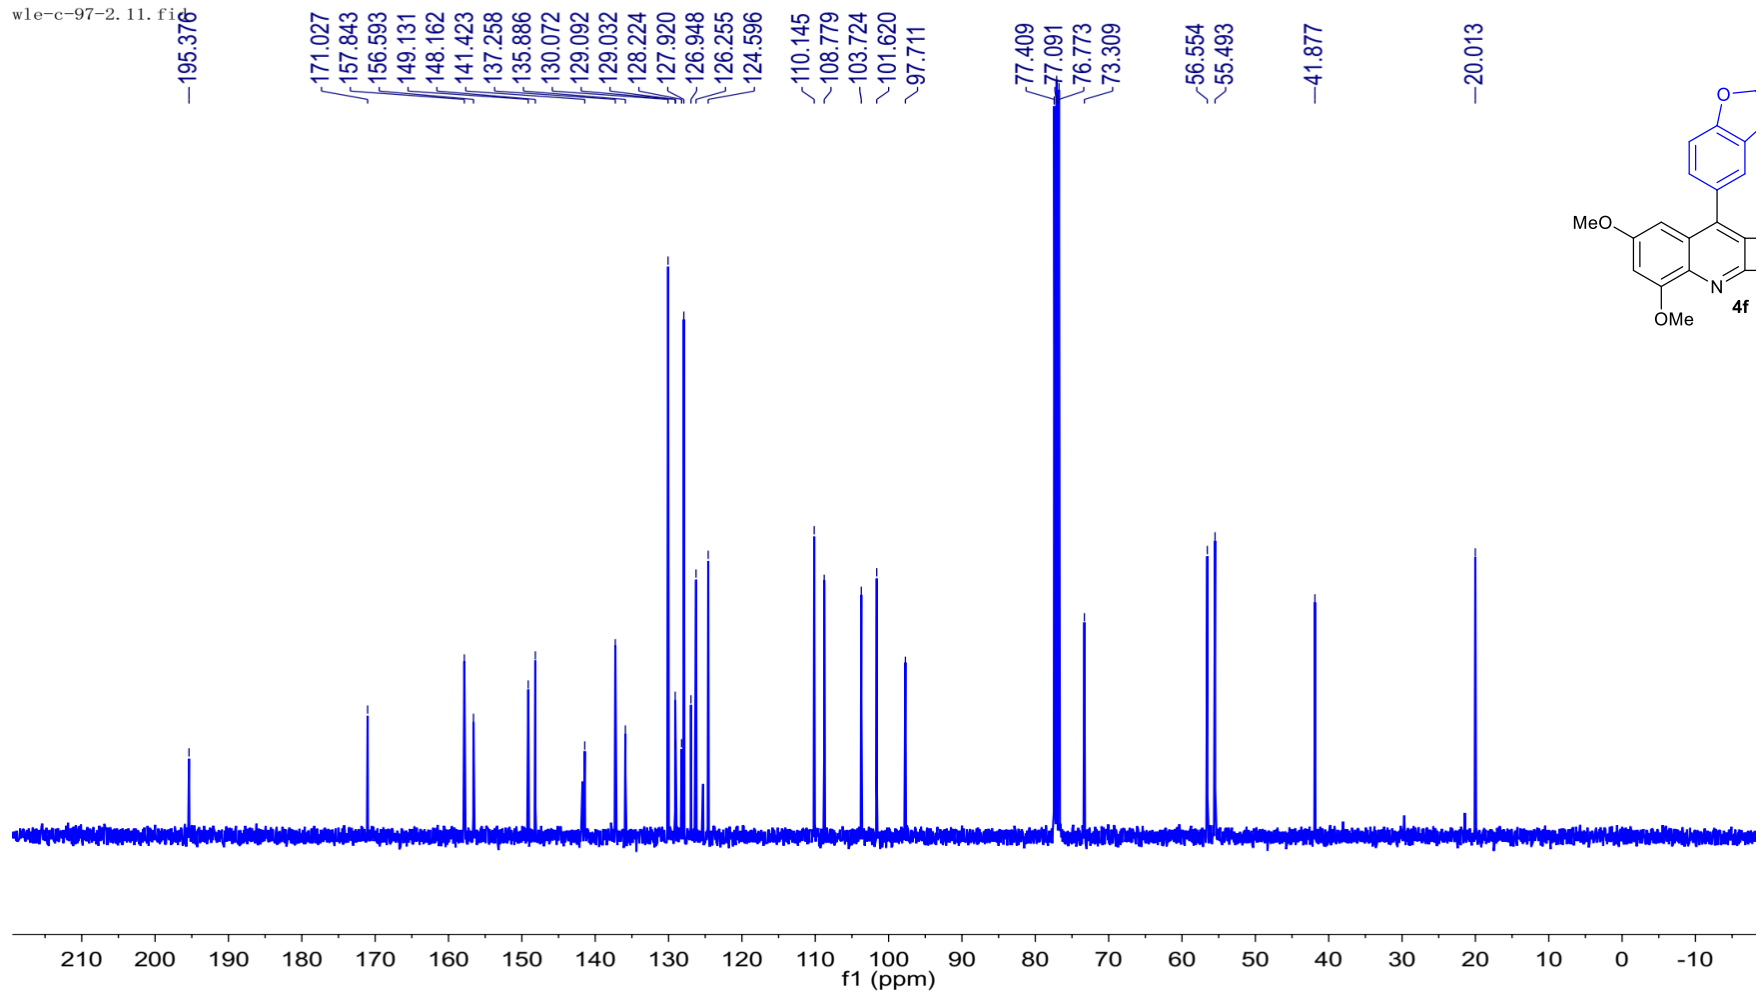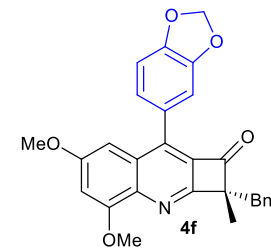

<sup>1</sup>H NMR Spectrum (400 MHz, Chloroform-d) of **4g**

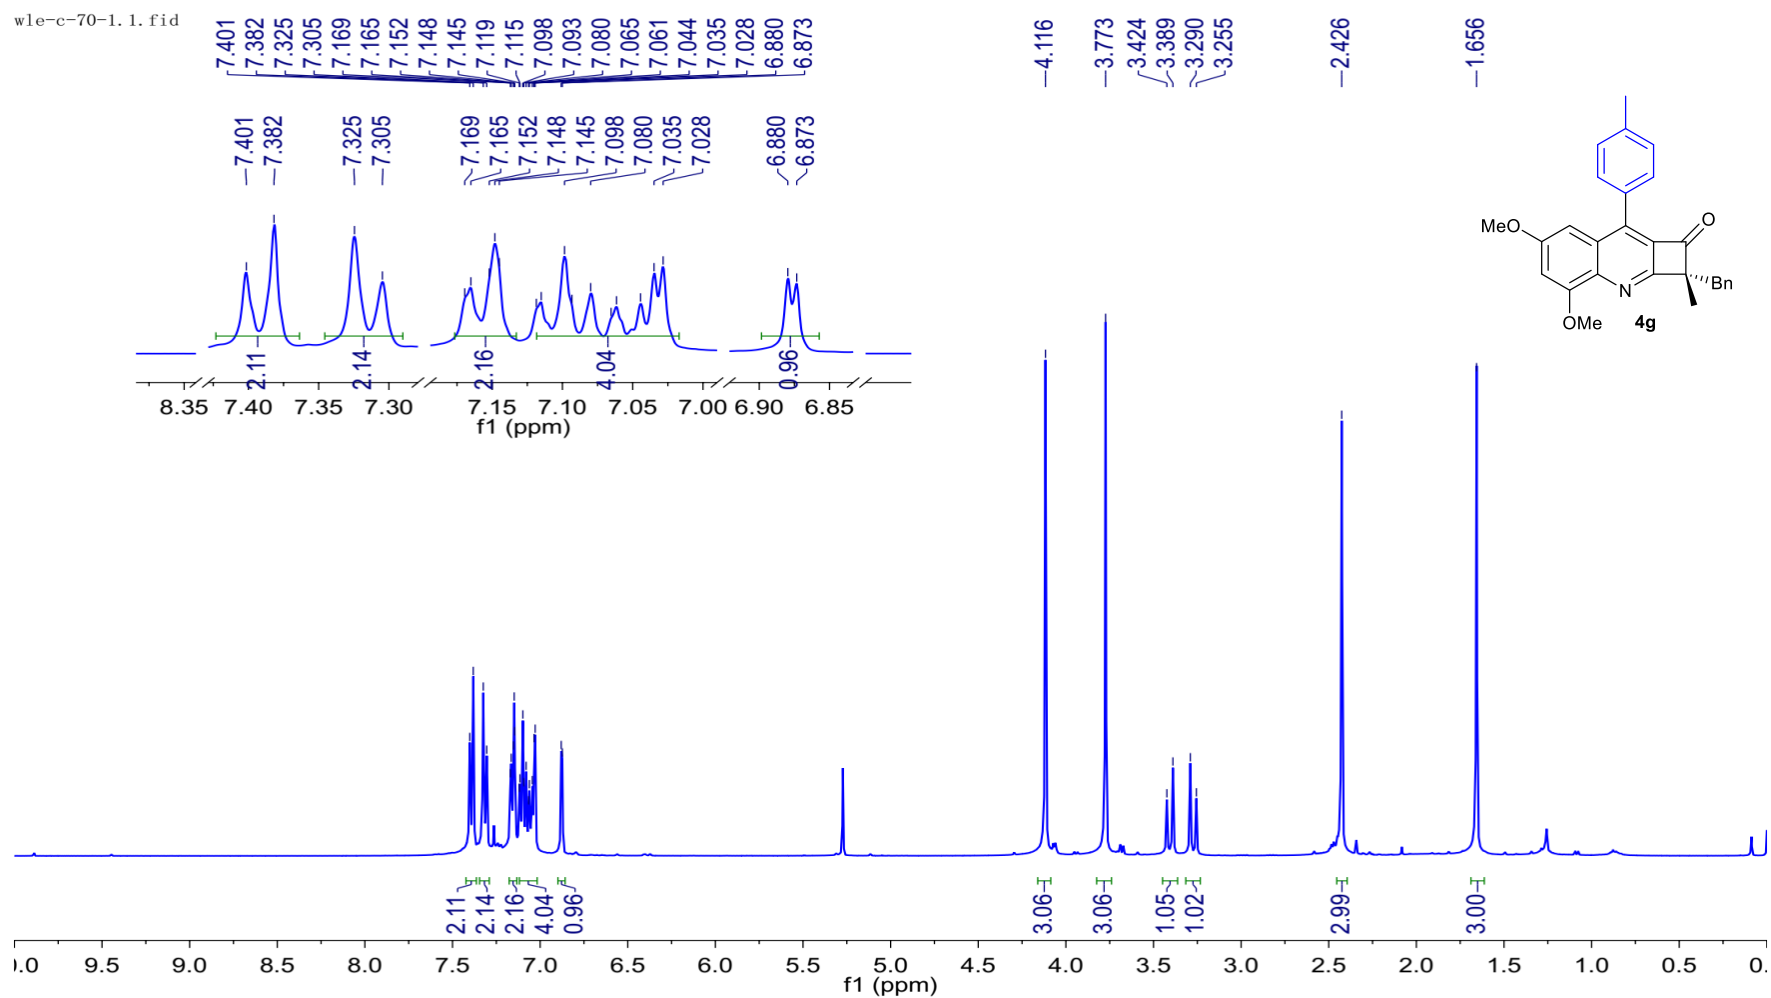



$^{13}\text{C}$   $\{^1\text{H}\}$  NMR Spectrum (101 MHz, Chloroform-d) of **4g**

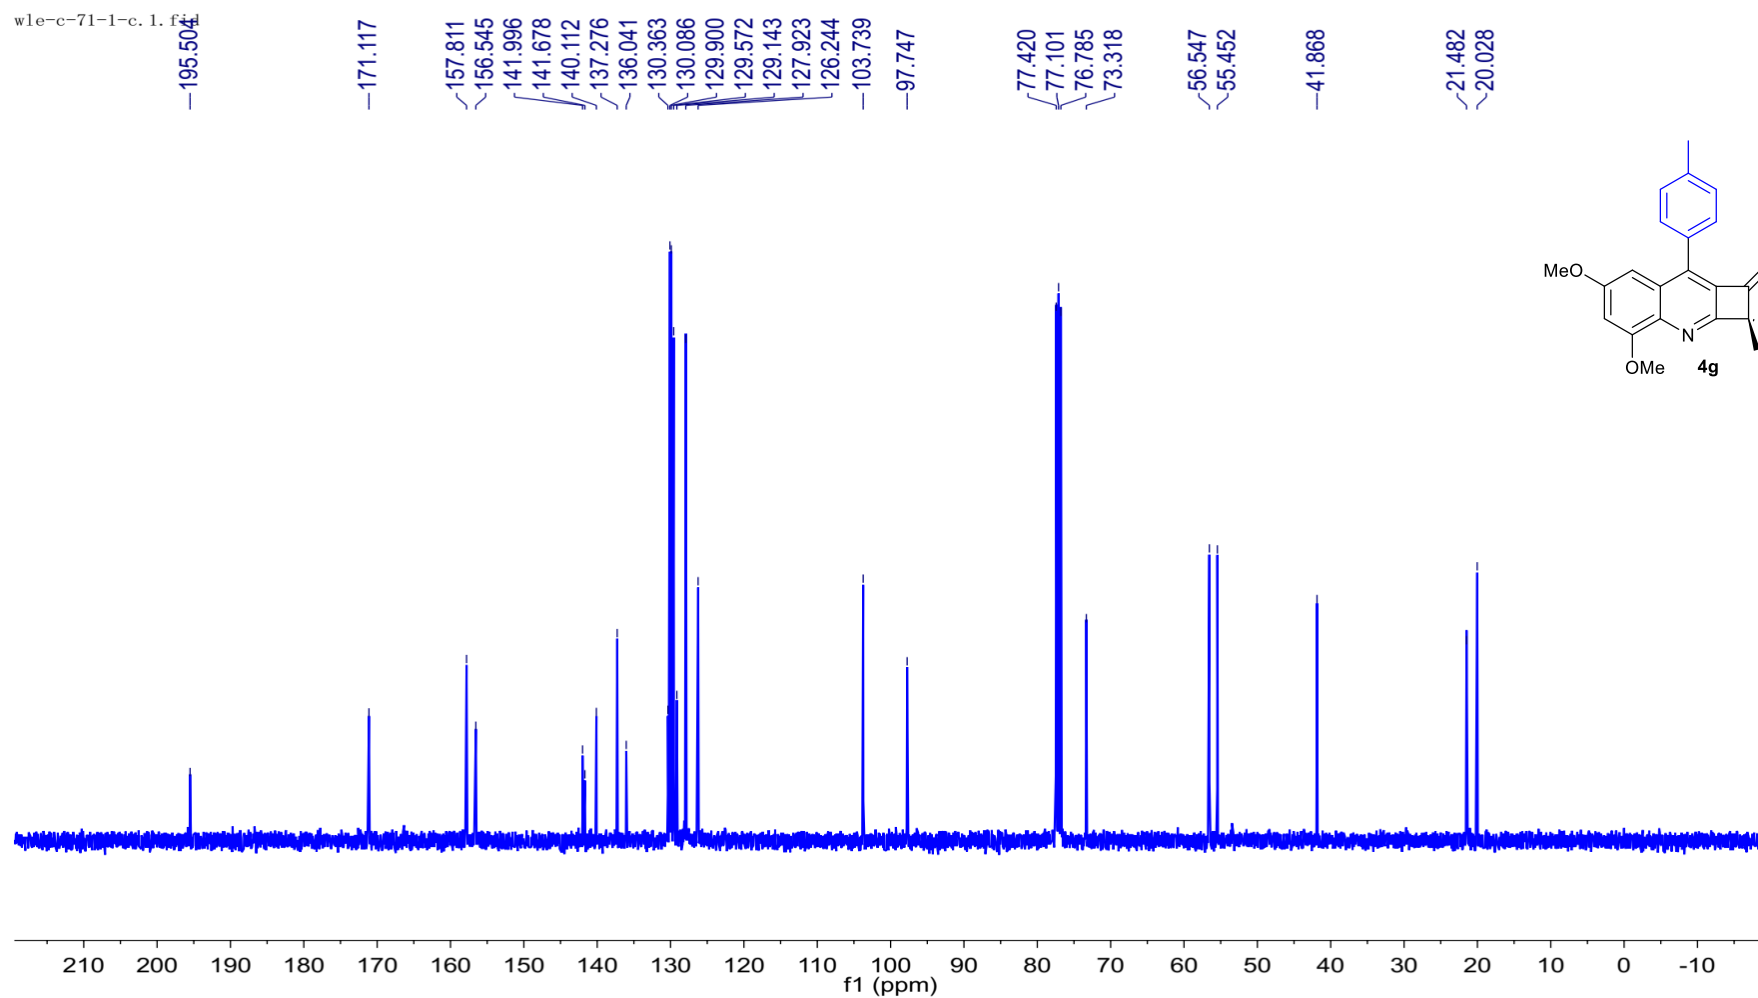

<sup>1</sup>H NMR Spectrum (400 MHz, Chloroform-d) of **4h**

WLE-C-88-3.1.fid

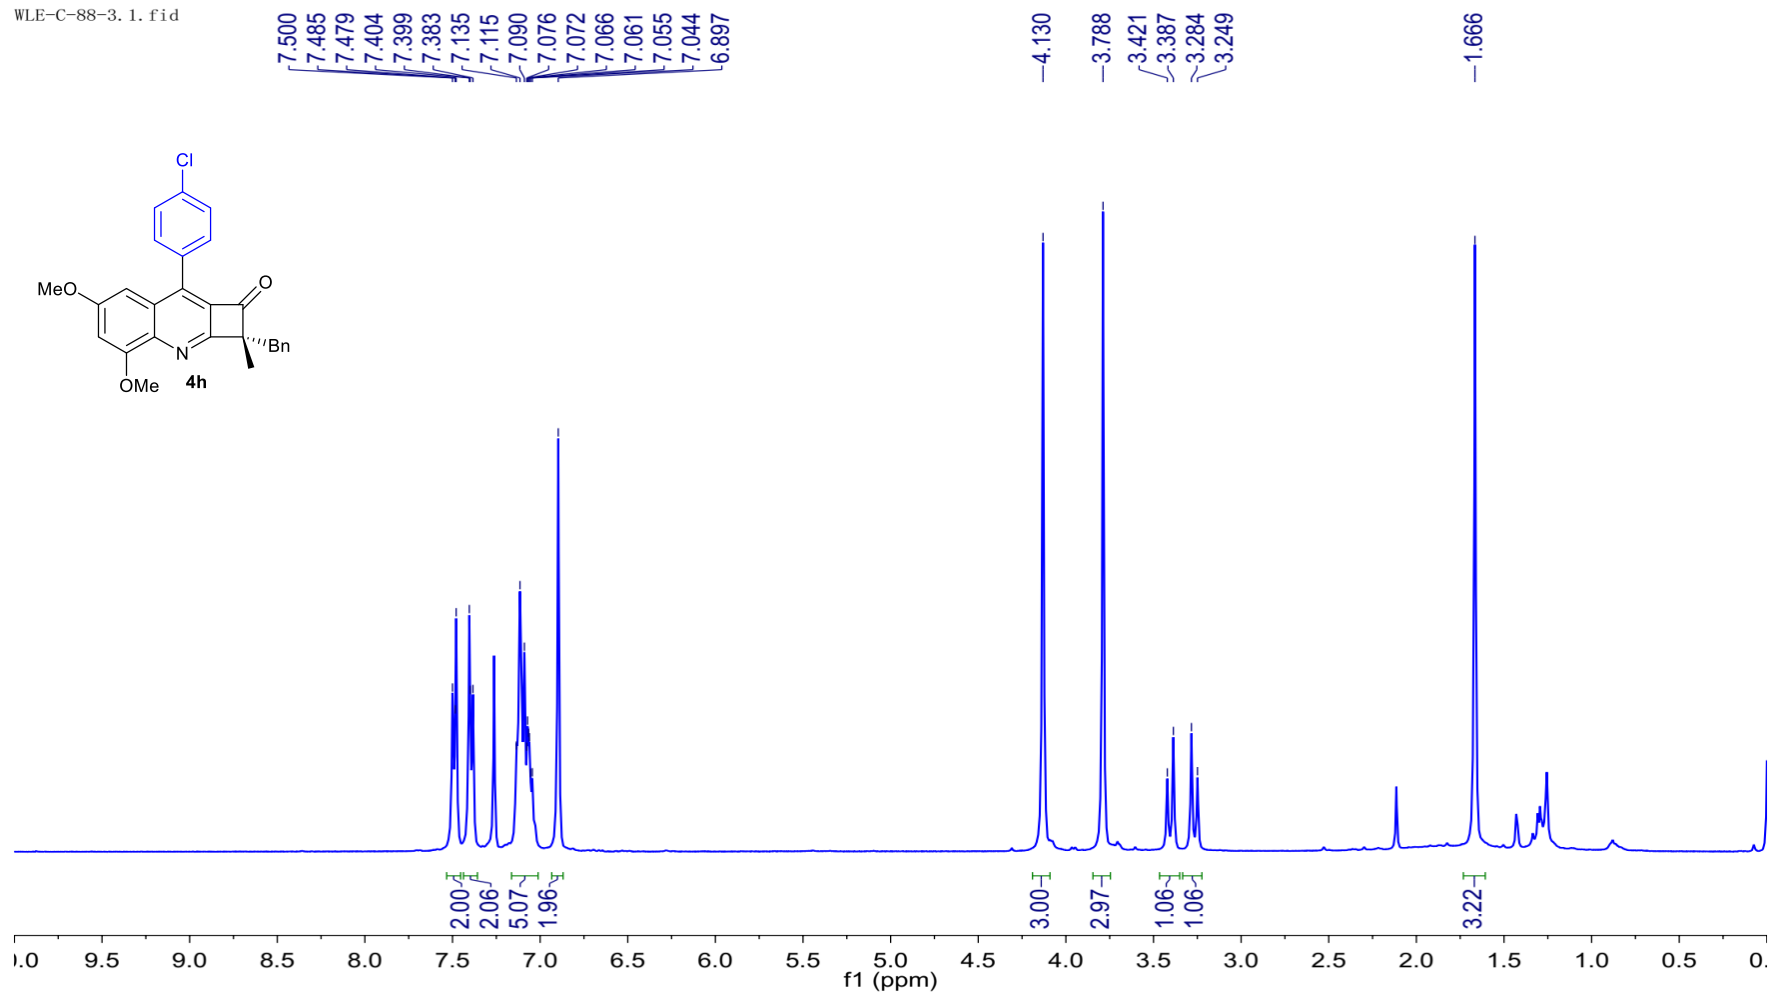

$^{13}\text{C}\{^1\text{H}\}$  NMR Spectrum (101 MHz, Chloroform-d) of **4h**

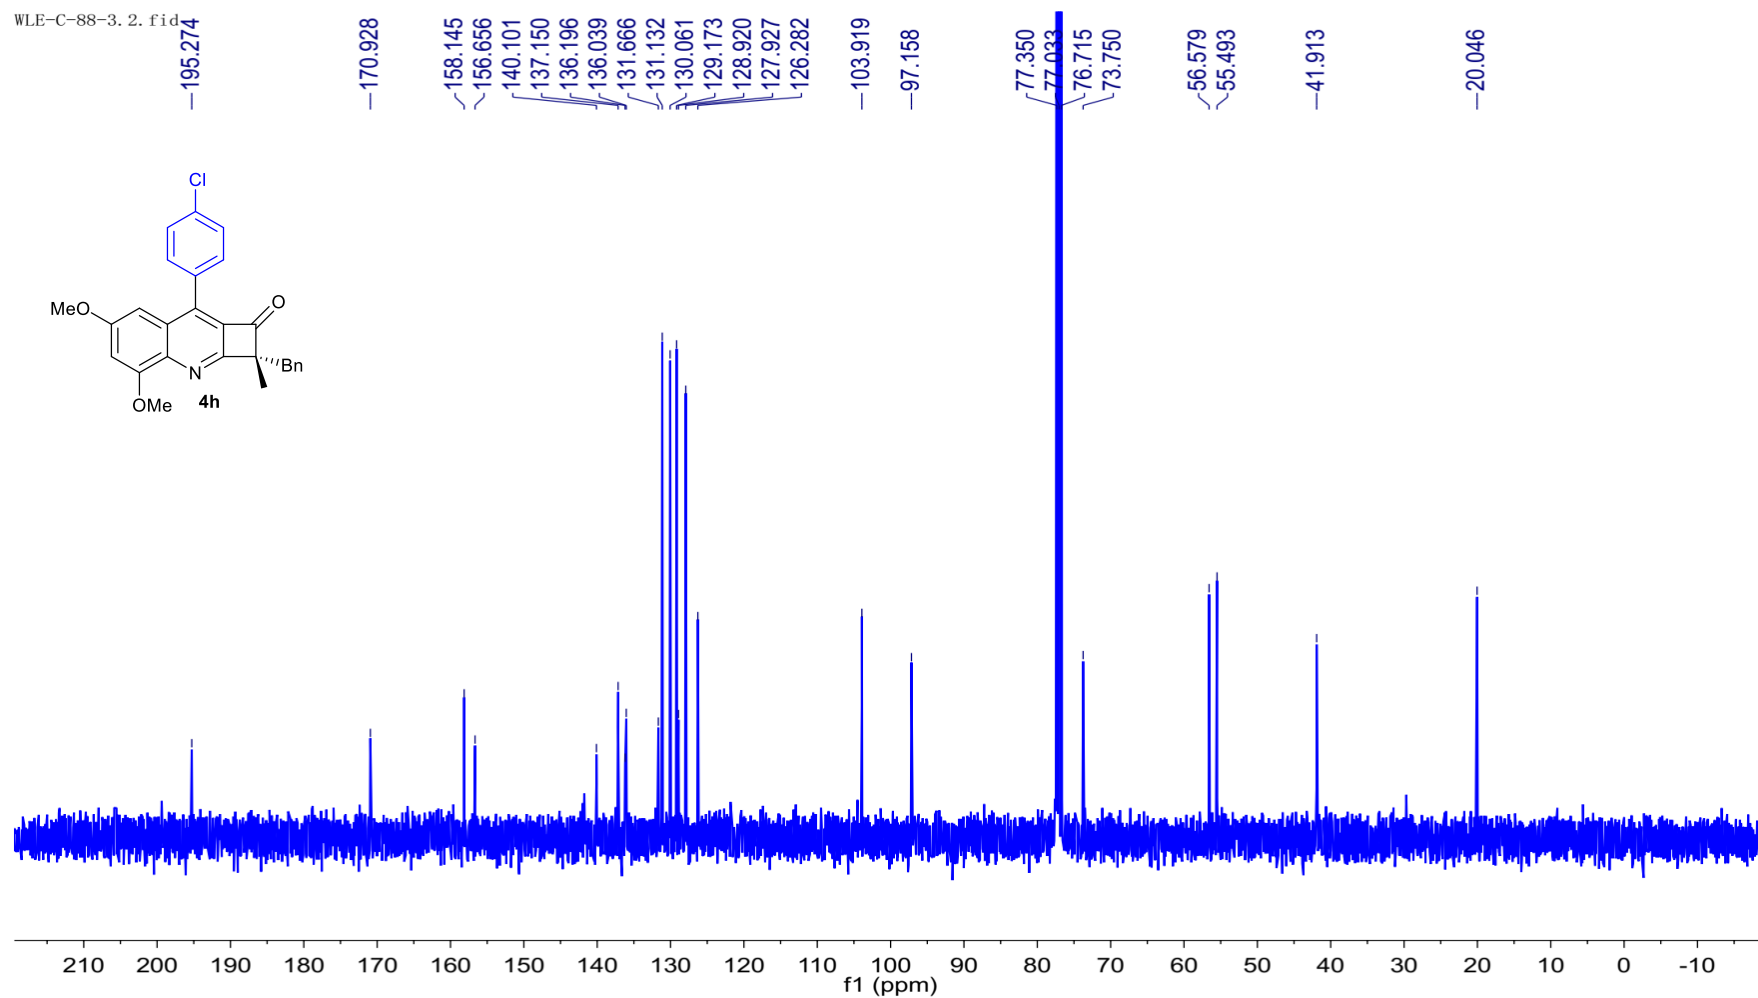

<sup>1</sup>H NMR Spectrum (600 MHz, Chloroform-d) of **4i**

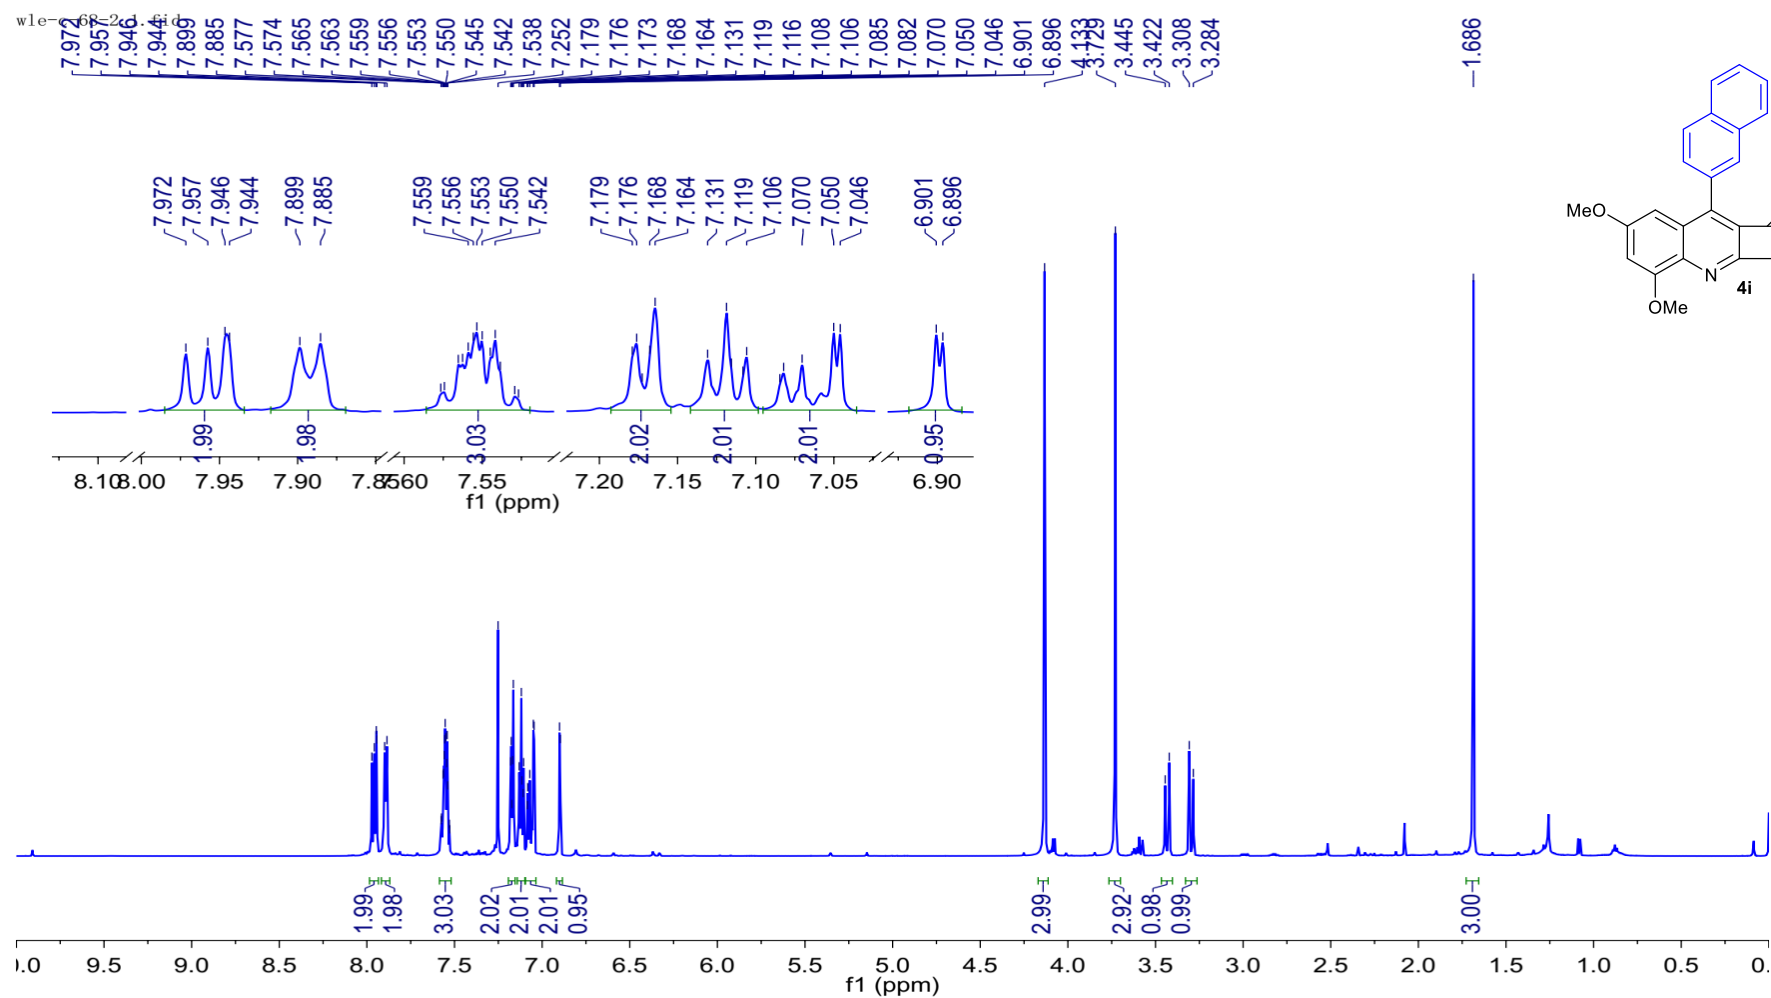

$^{13}\text{C}$   $\{^1\text{H}\}$  NMR Spectrum (101 MHz, Chloroform-d) of **4i**

w1e-c-68-2-c.1.f

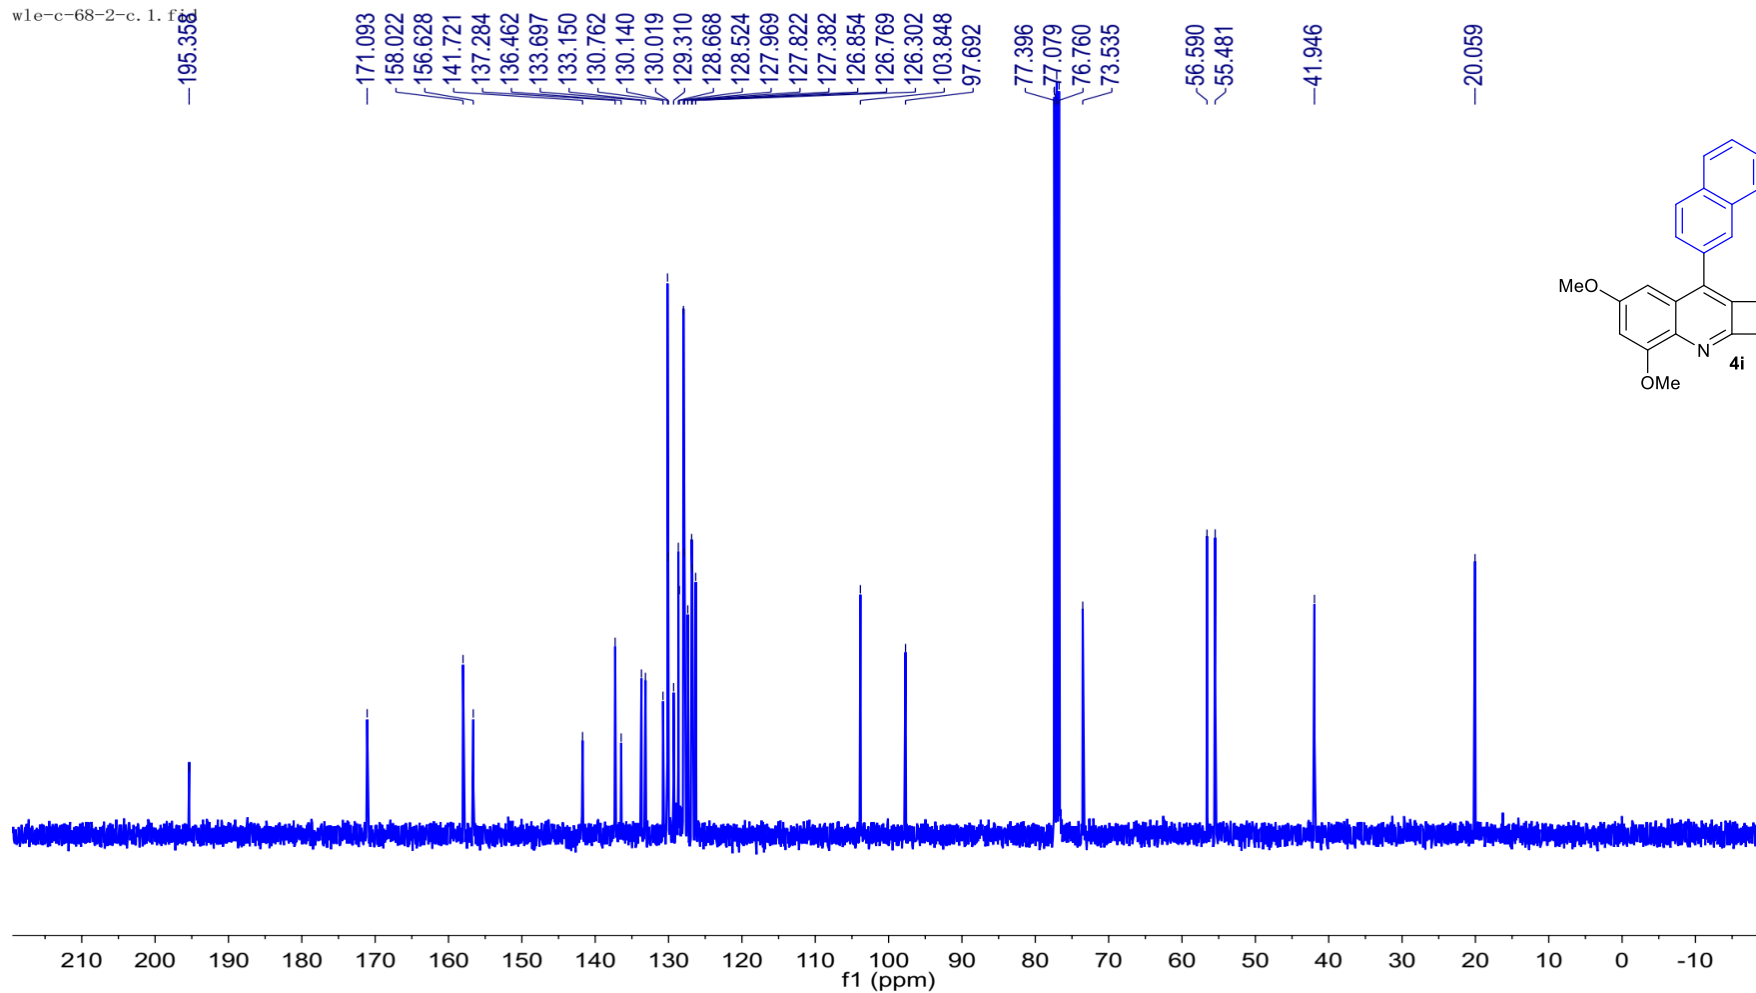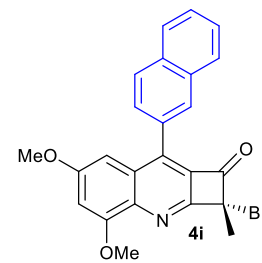

<sup>1</sup>H NMR Spectrum (400 MHz, Chloroform-d) of **4j**

wle-c-87-1.1.fid

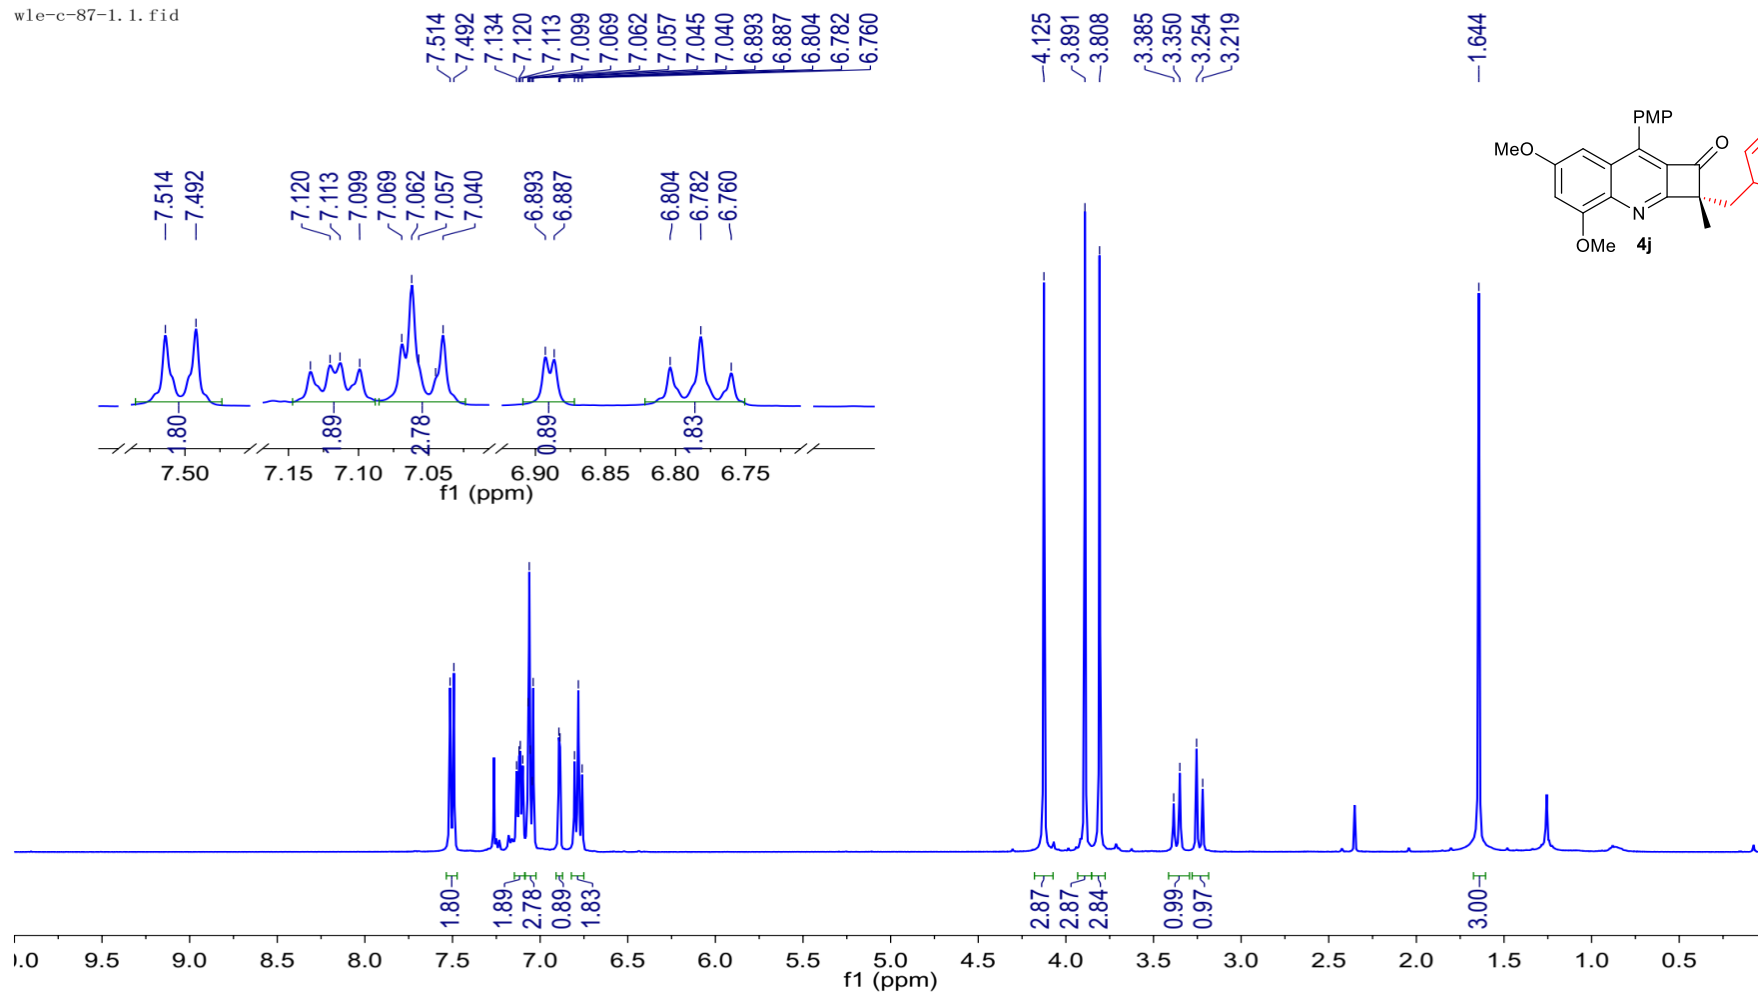

$^{13}\text{C}$   $\{^1\text{H}\}$  NMR Spectrum (101 MHz, Chloroform-d) of **4j**

wle-c-87-1-c. 1. f1

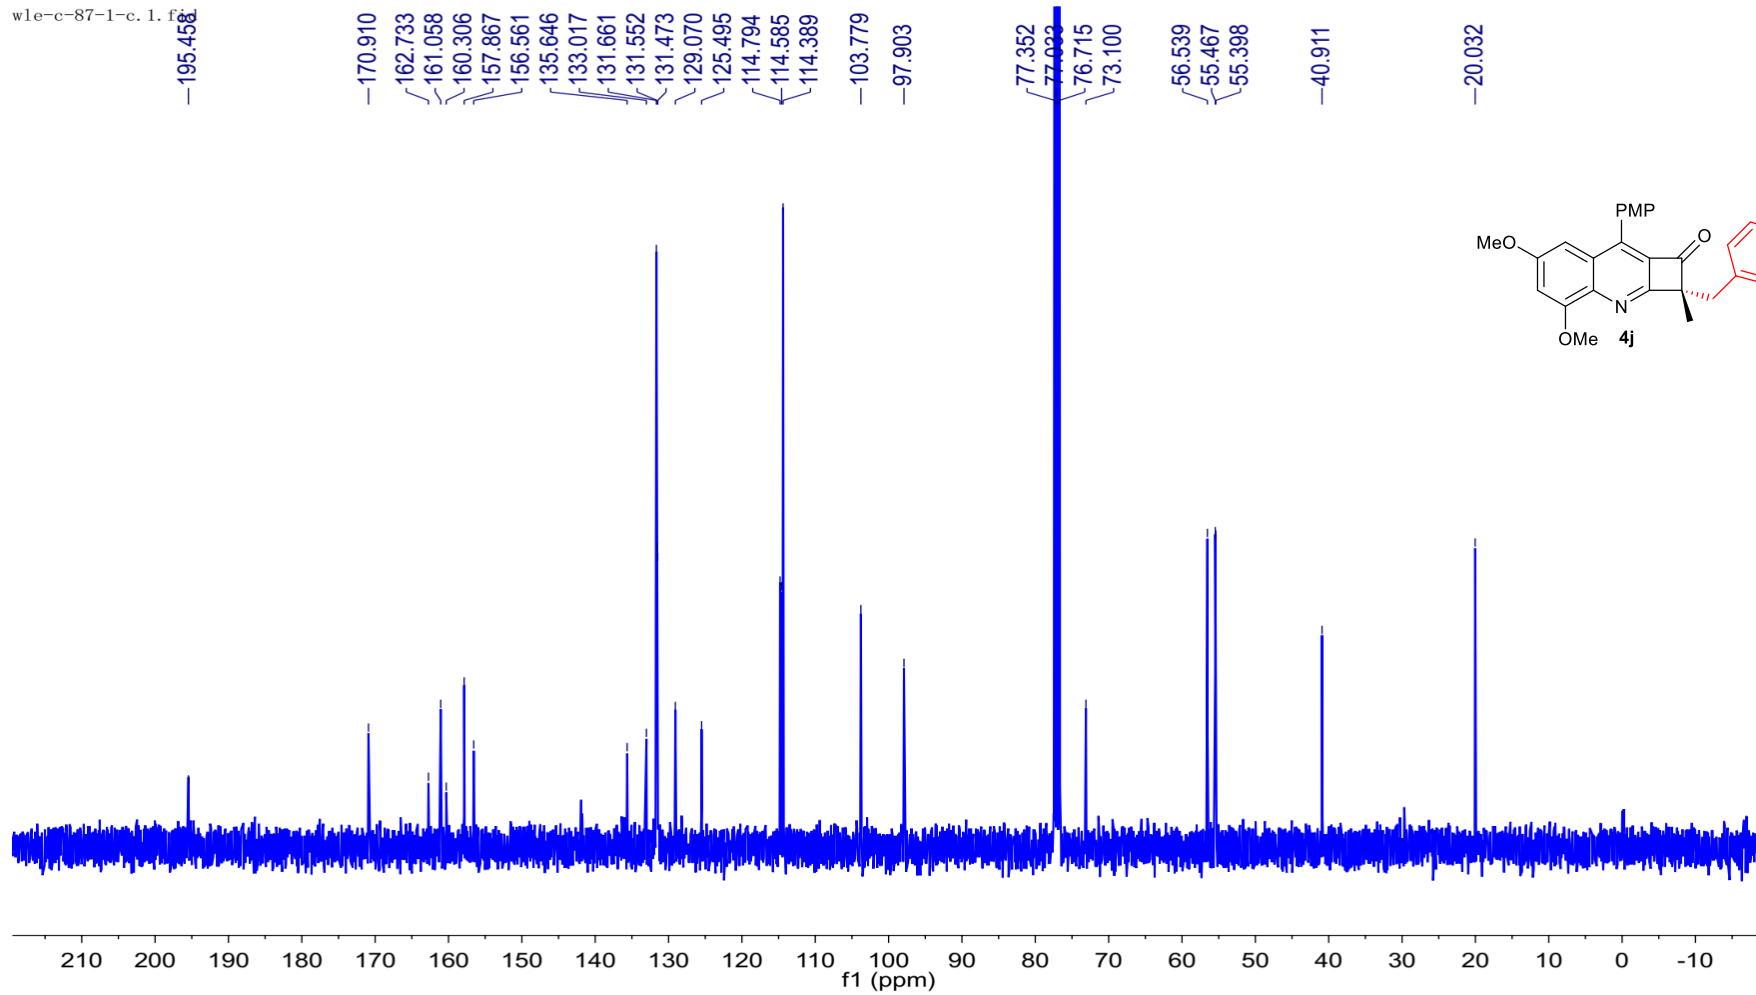

<sup>1</sup>H NMR Spectrum (400 MHz, Chloroform-d) of **4k**

wle-c-99-1.1.fid

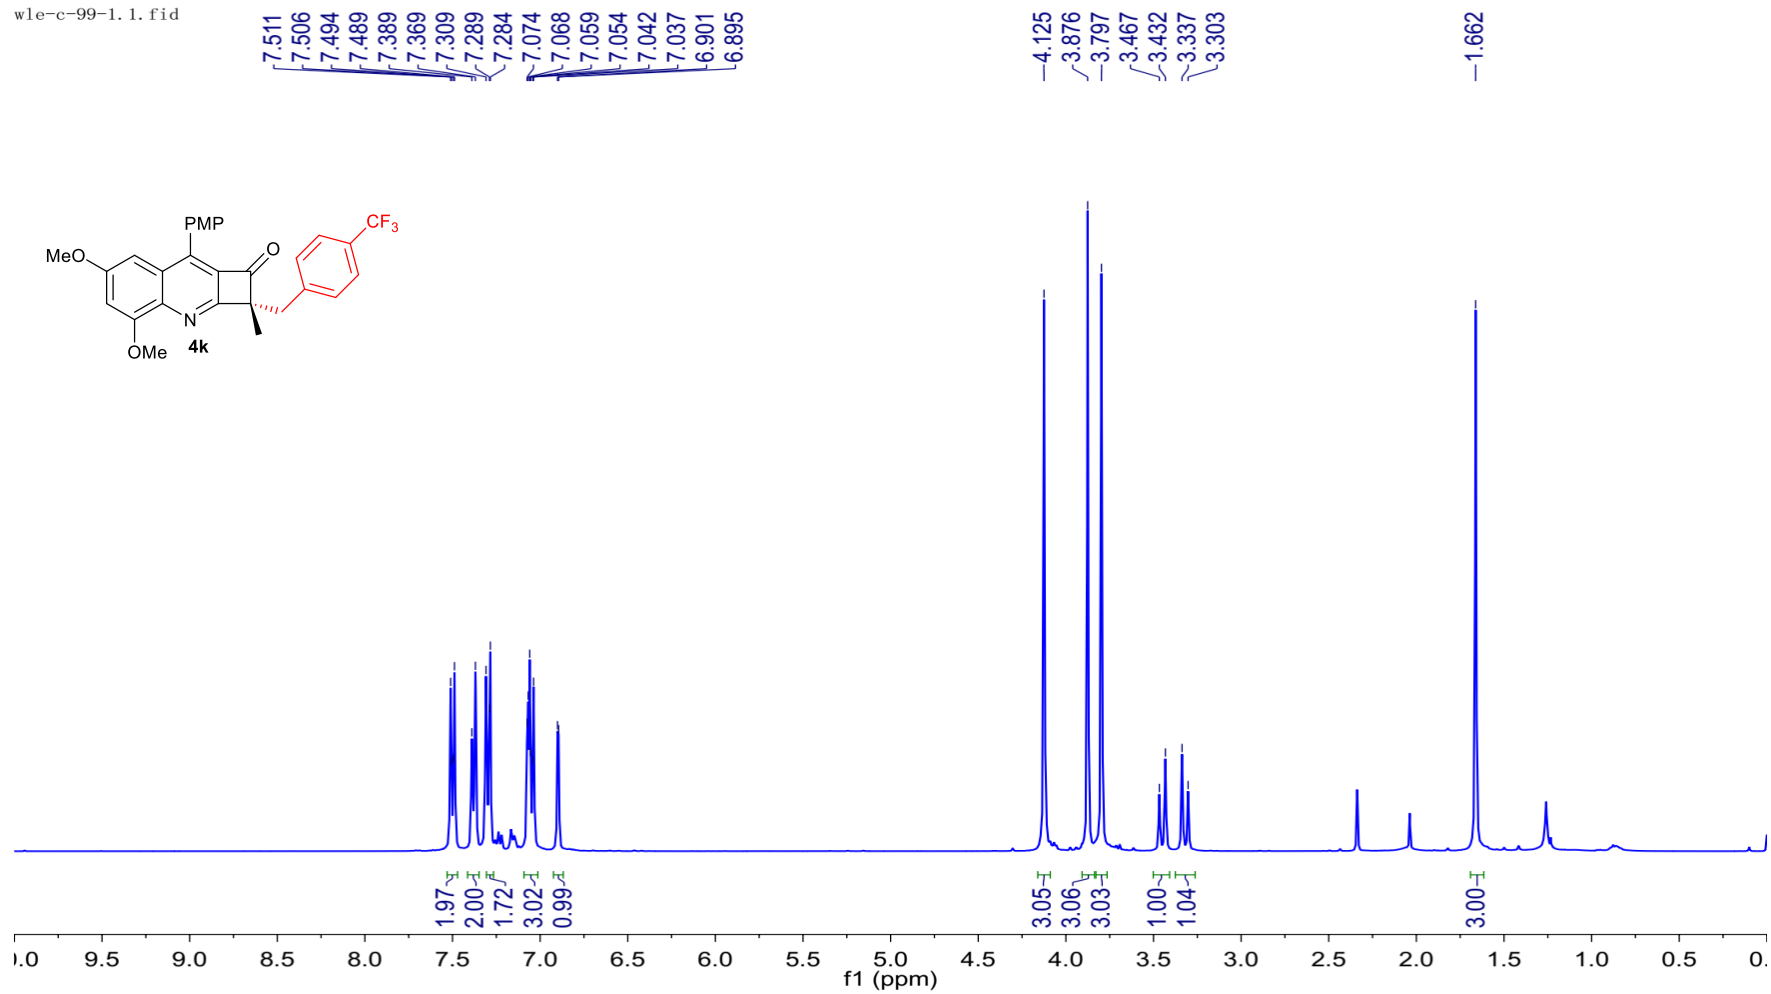



$^{13}\text{C}$  { $^1\text{H}$ } NMR Spectrum (101 MHz, Chloroform-d) of **4k**

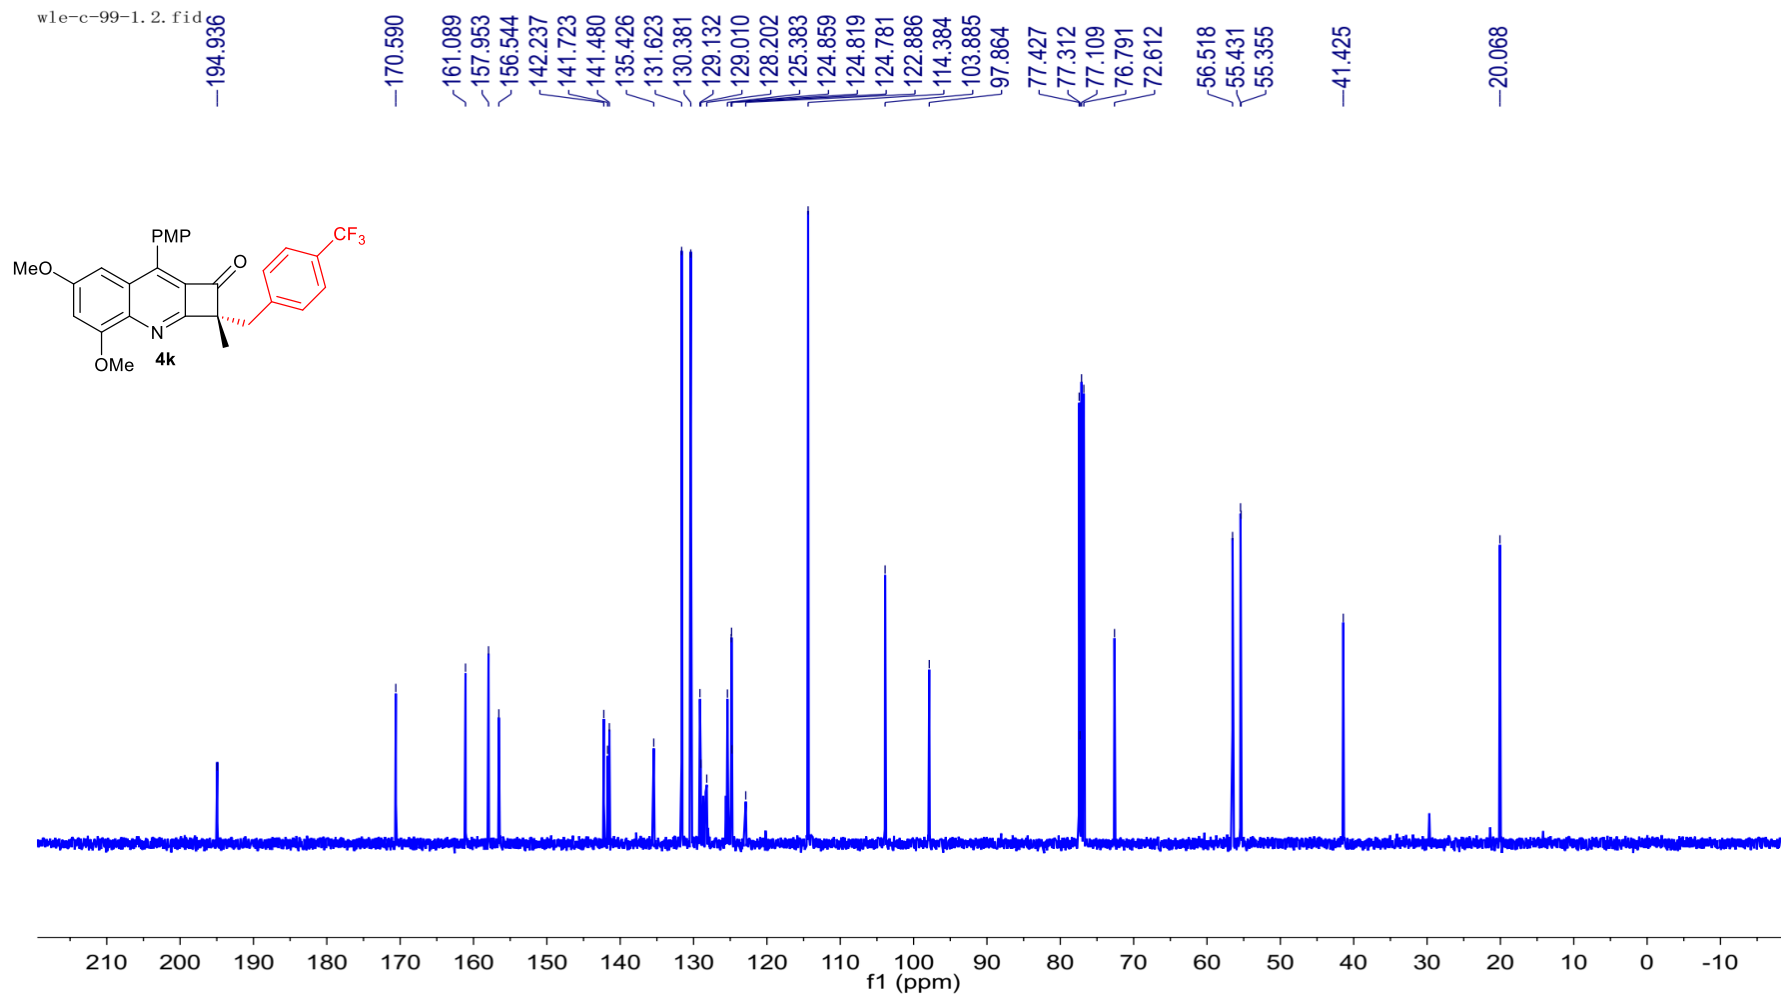

<sup>1</sup>H NMR Spectrum (400 MHz, Chloroform-d) of **4I**

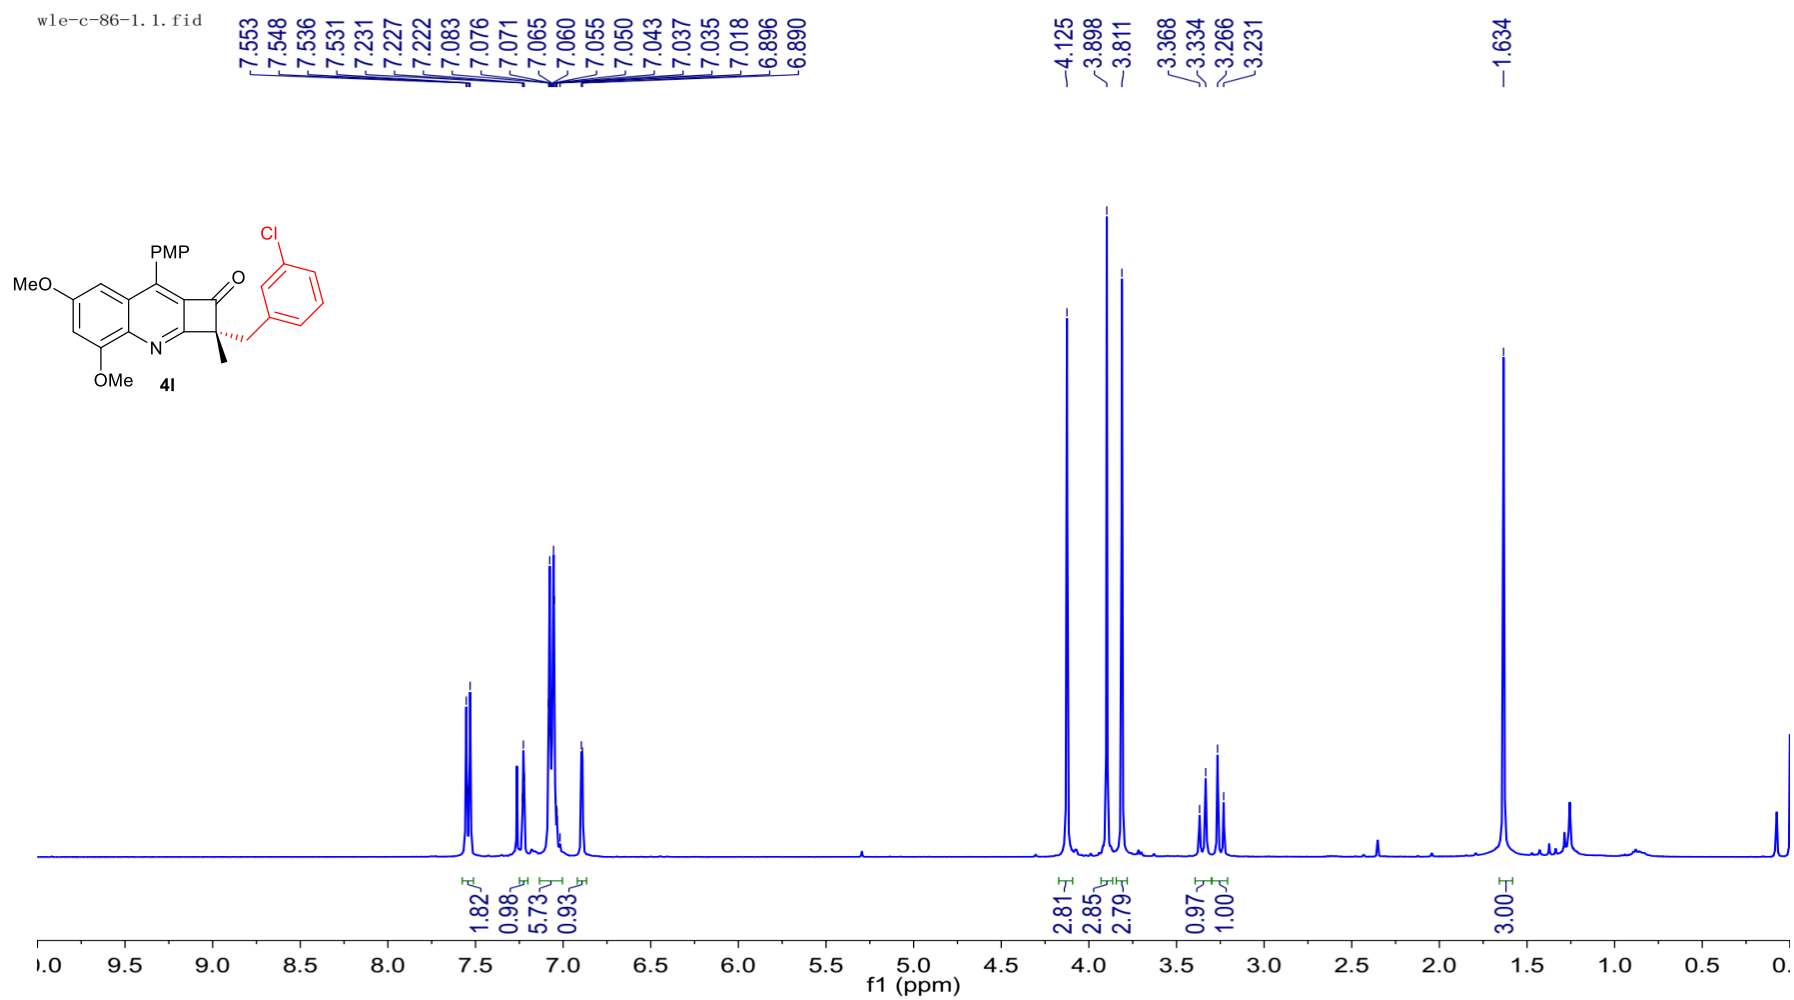

$^{13}\text{C}$  { $^1\text{H}$ } NMR Spectrum (101 MHz, Chloroform-d) of **41**

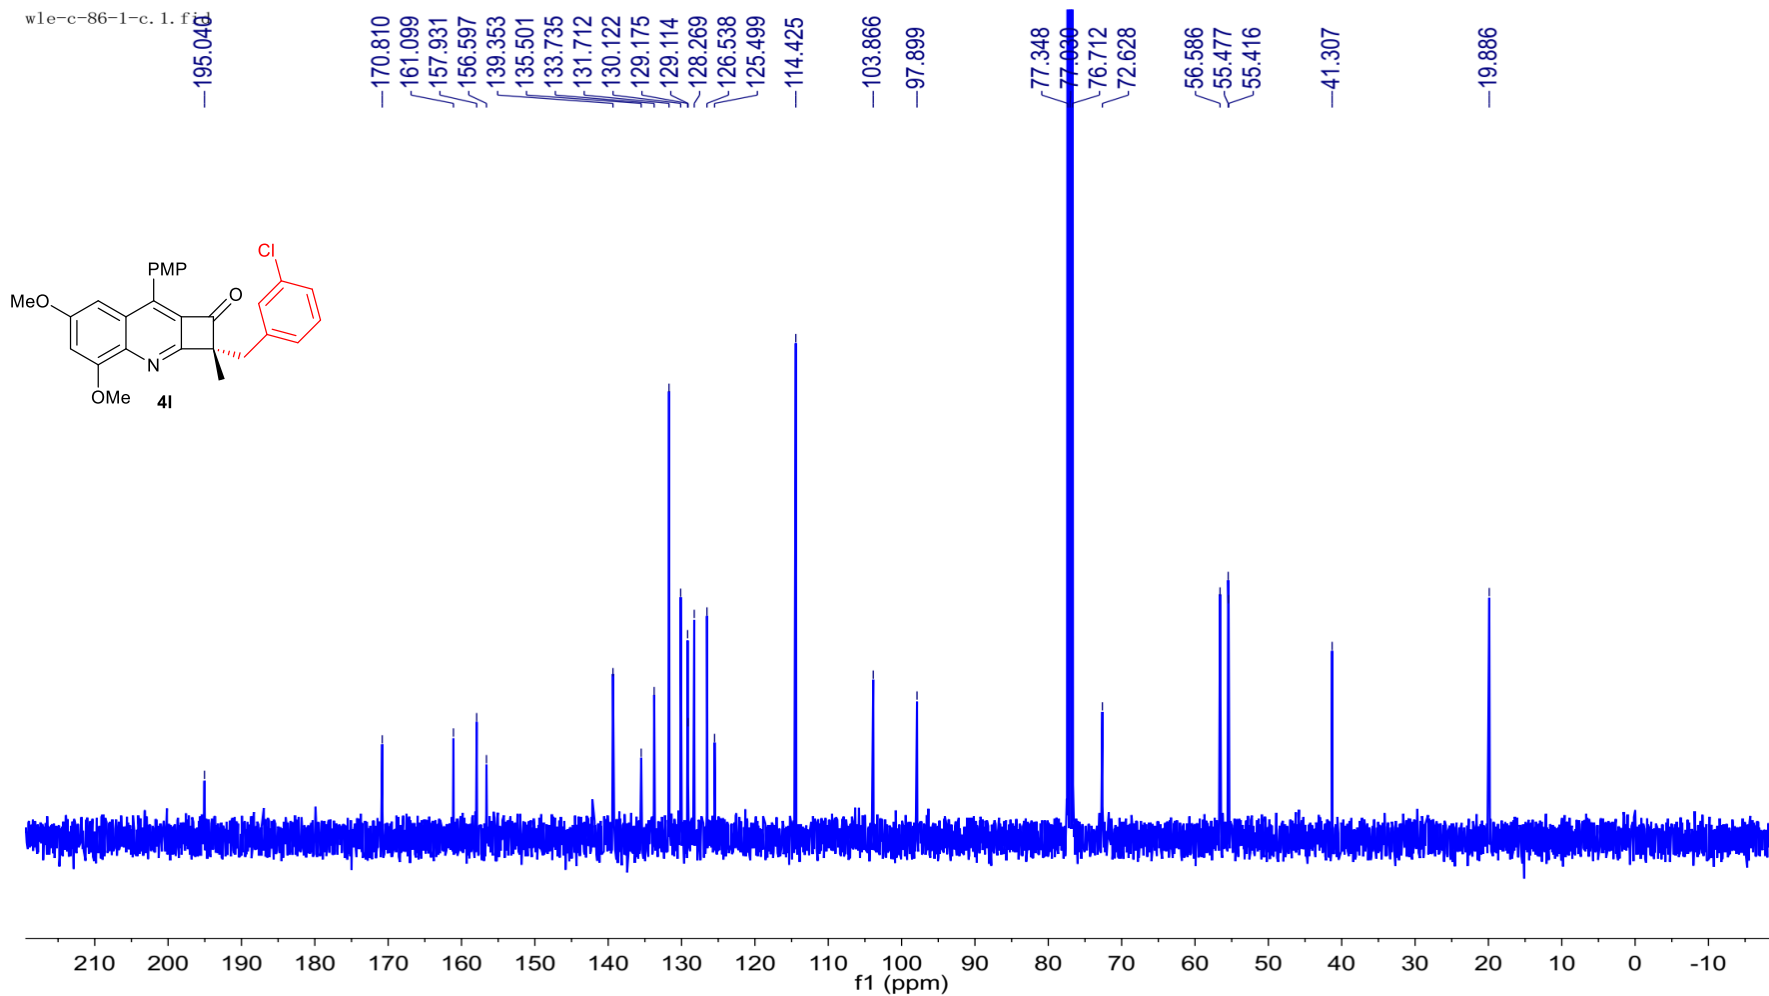

<sup>1</sup>H NMR Spectrum (400 MHz, Chloroform-d) of **4m**

wle-c-85-5.1.fid

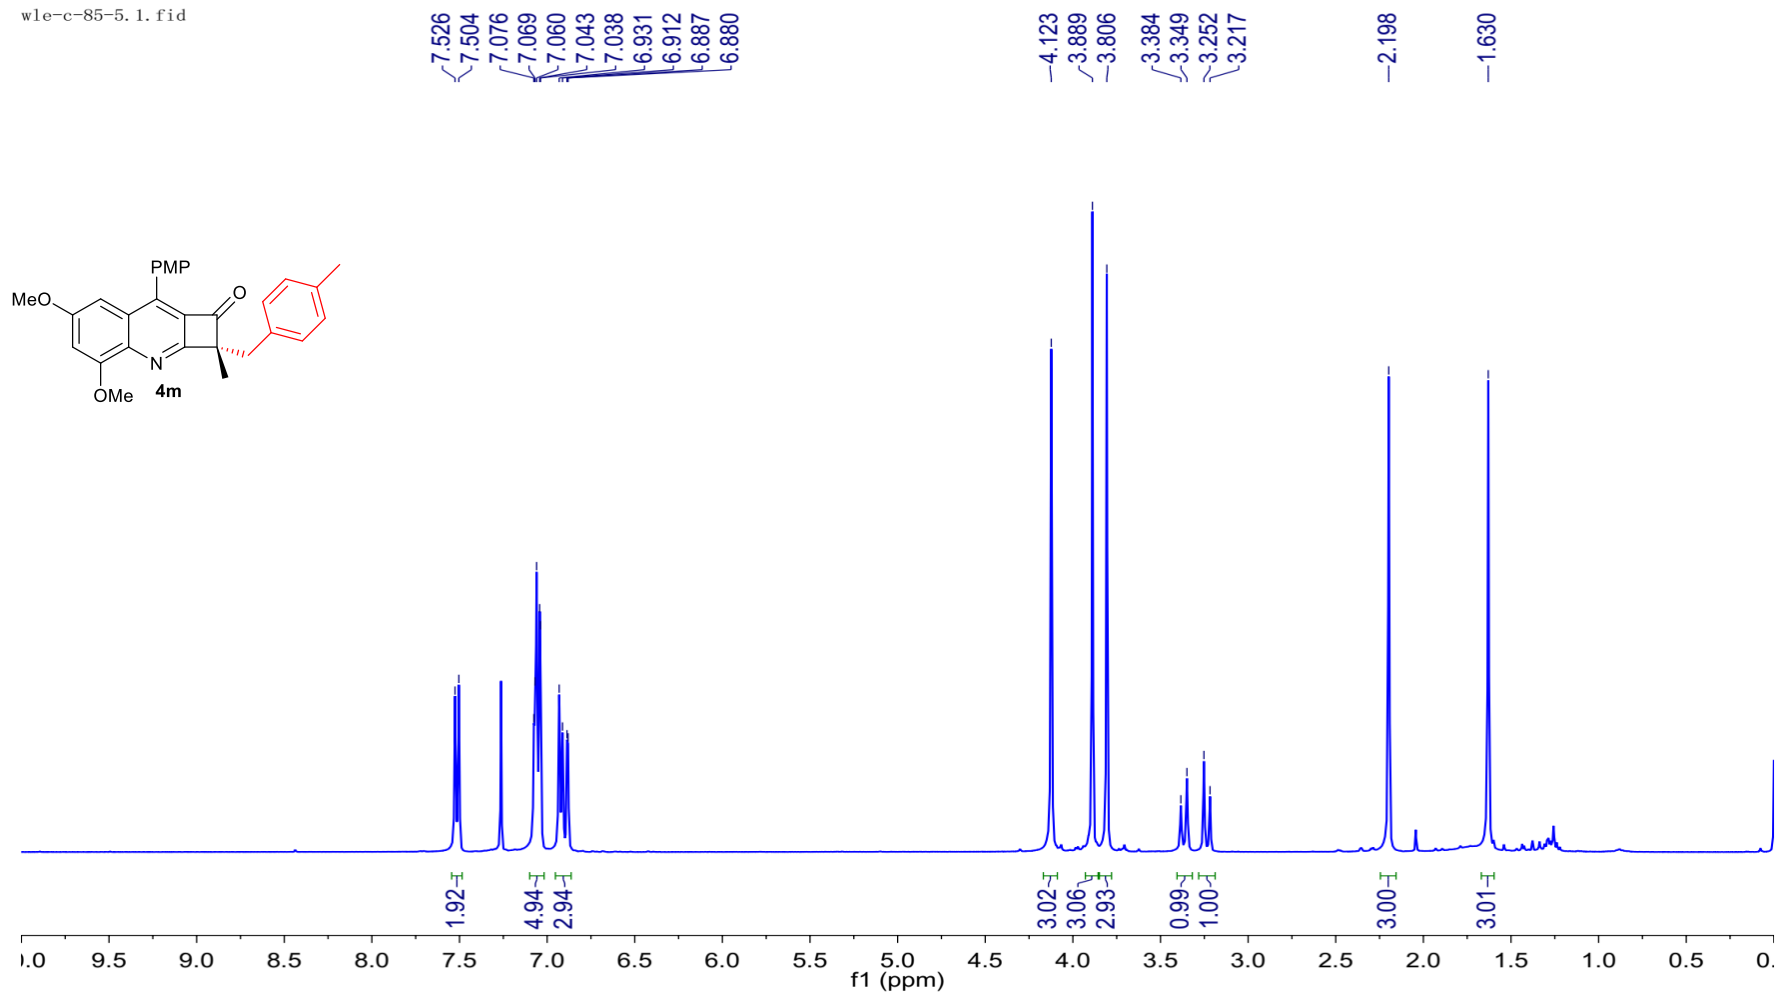

$^{13}\text{C}$  { $^1\text{H}$ } NMR Spectrum (101 MHz, Chloroform-d) of **4m**

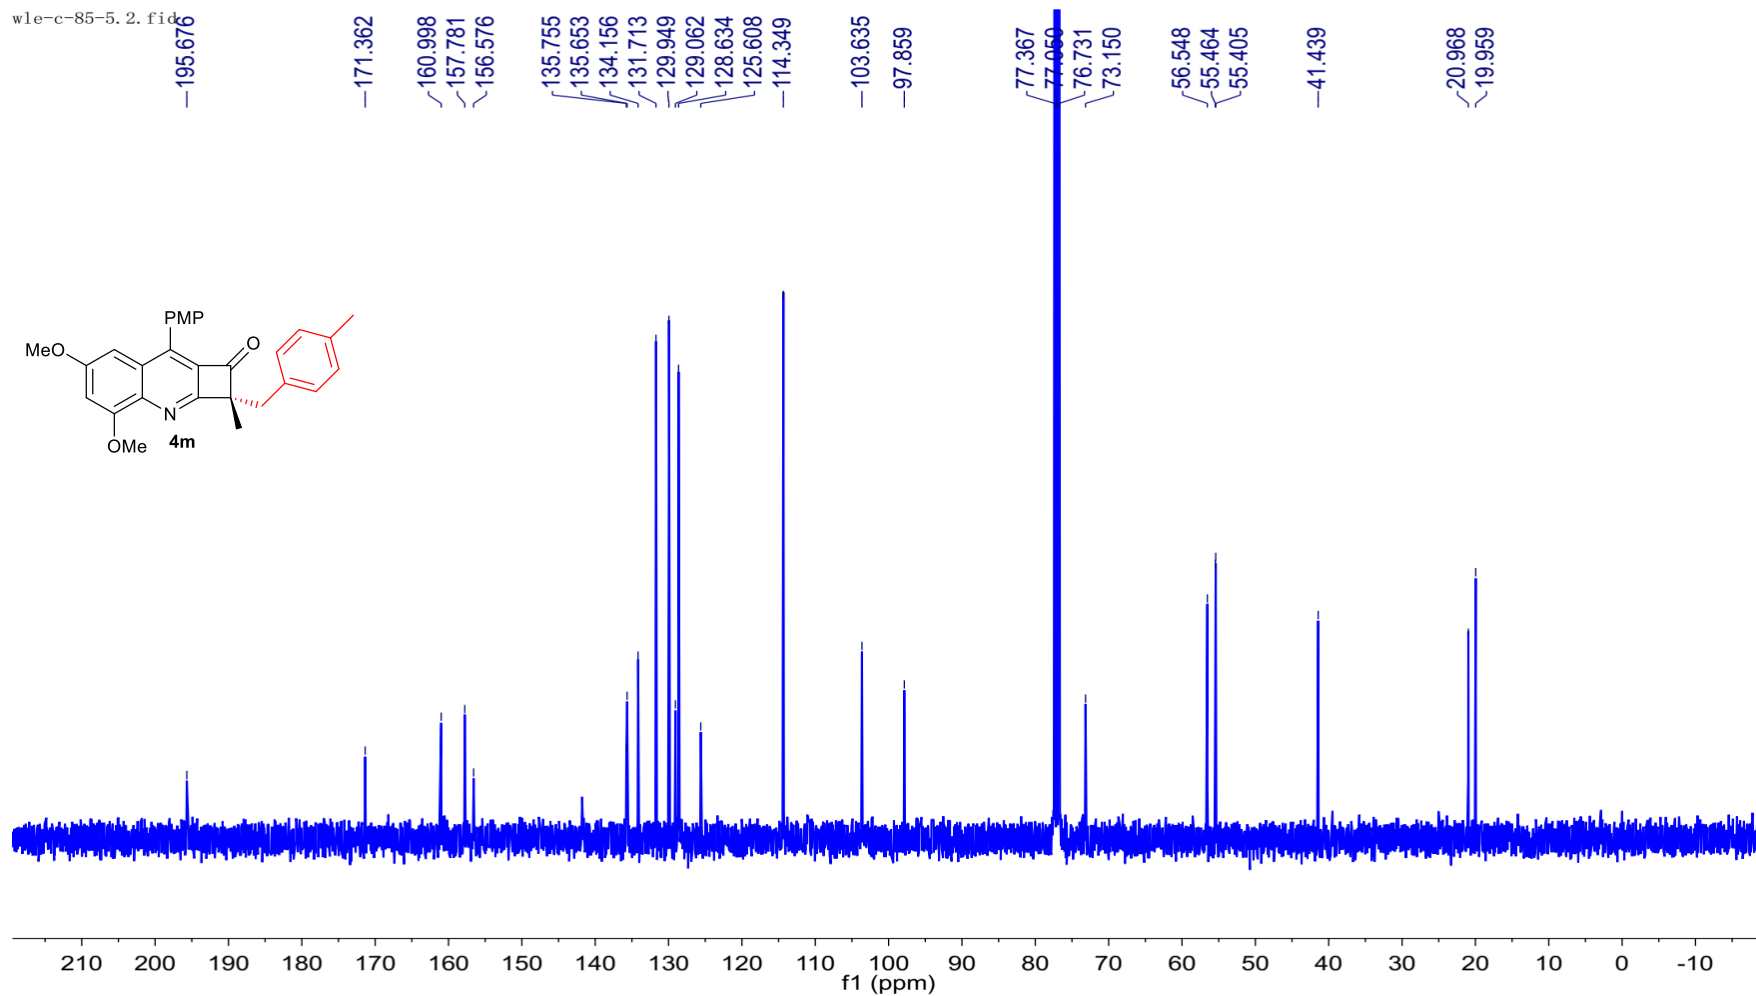

<sup>1</sup>H NMR Spectrum (400 MHz, Chloroform-d) of **4n**

wle-d-1-1.1.fid

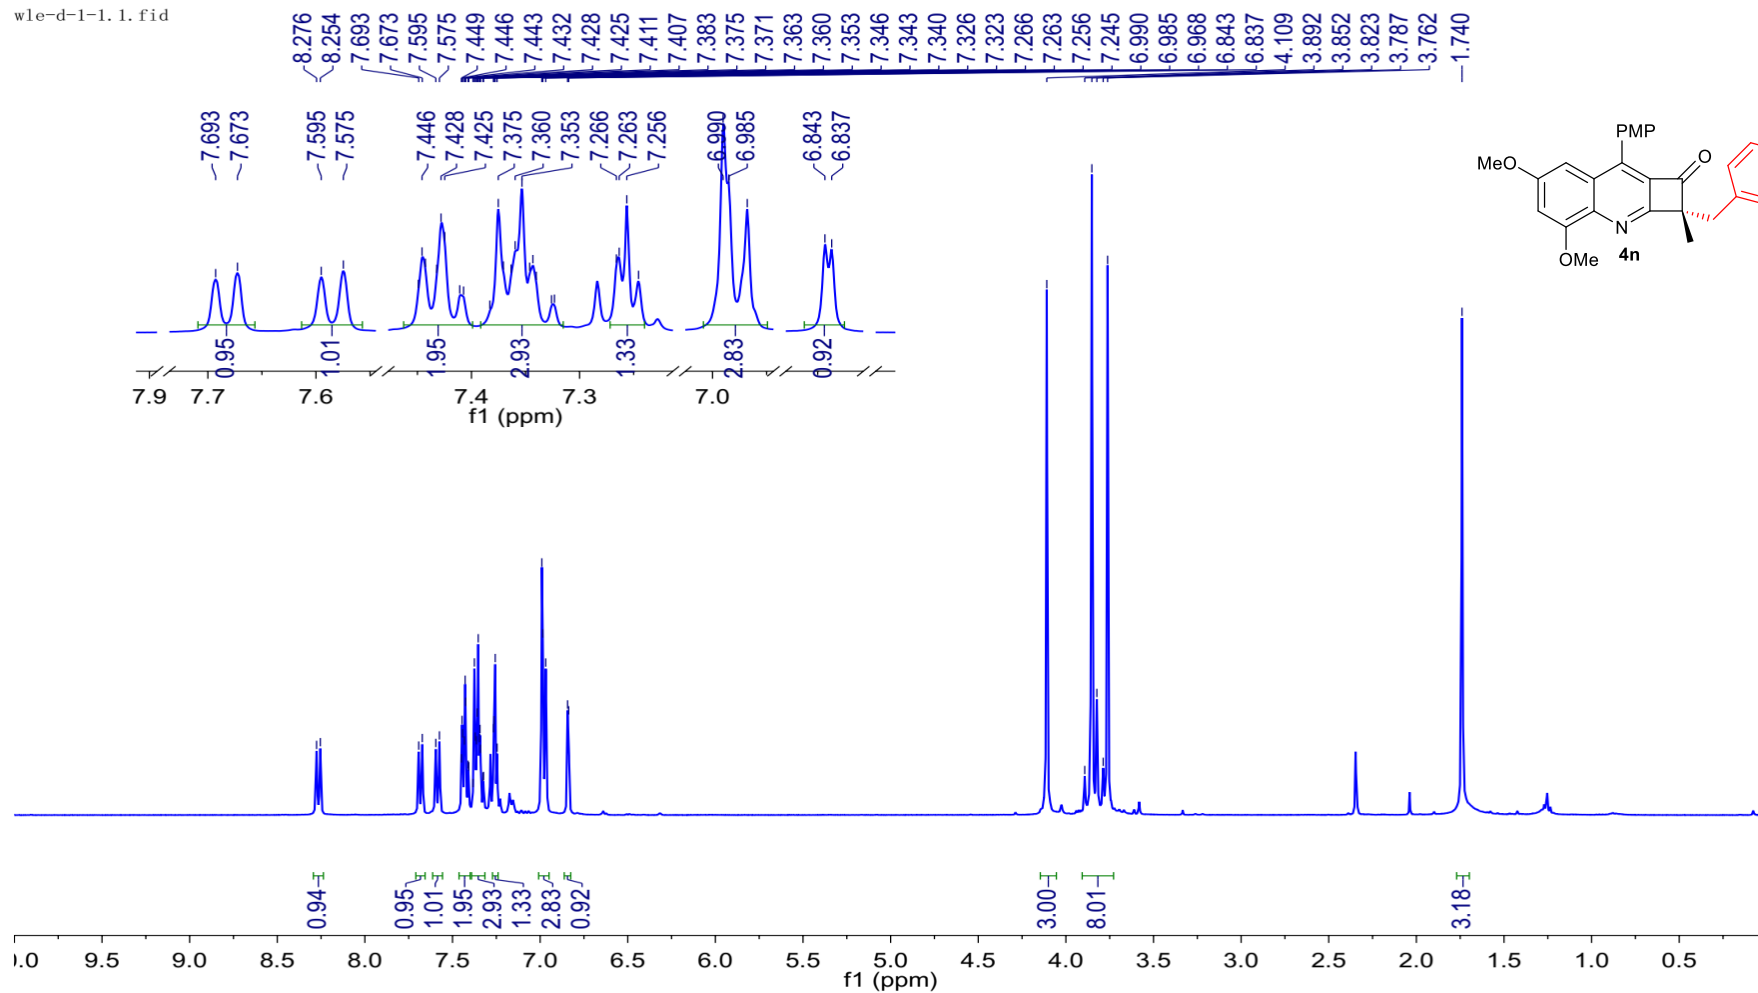

$^{13}\text{C}$   $\{^1\text{H}\}$  NMR Spectrum (101 MHz, Chloroform-d) of **4n**

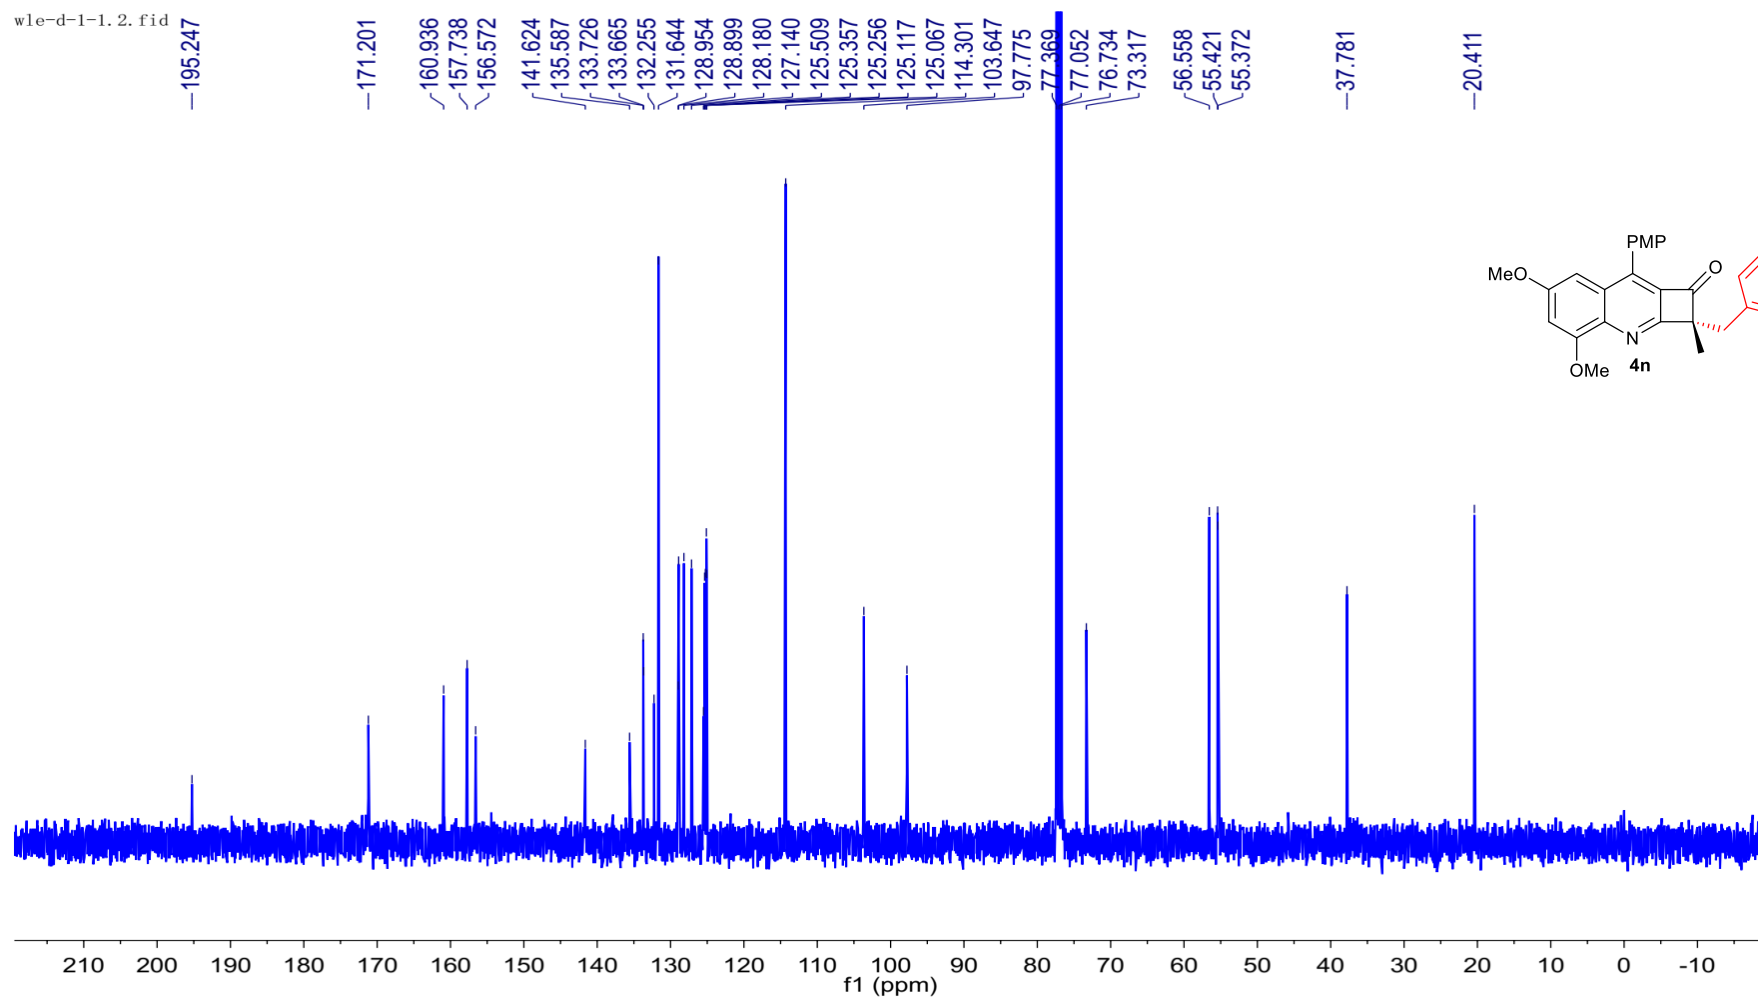

<sup>1</sup>H NMR Spectrum (400 MHz, Chloroform-d) of **4o**

wle-c-89. 1. fid

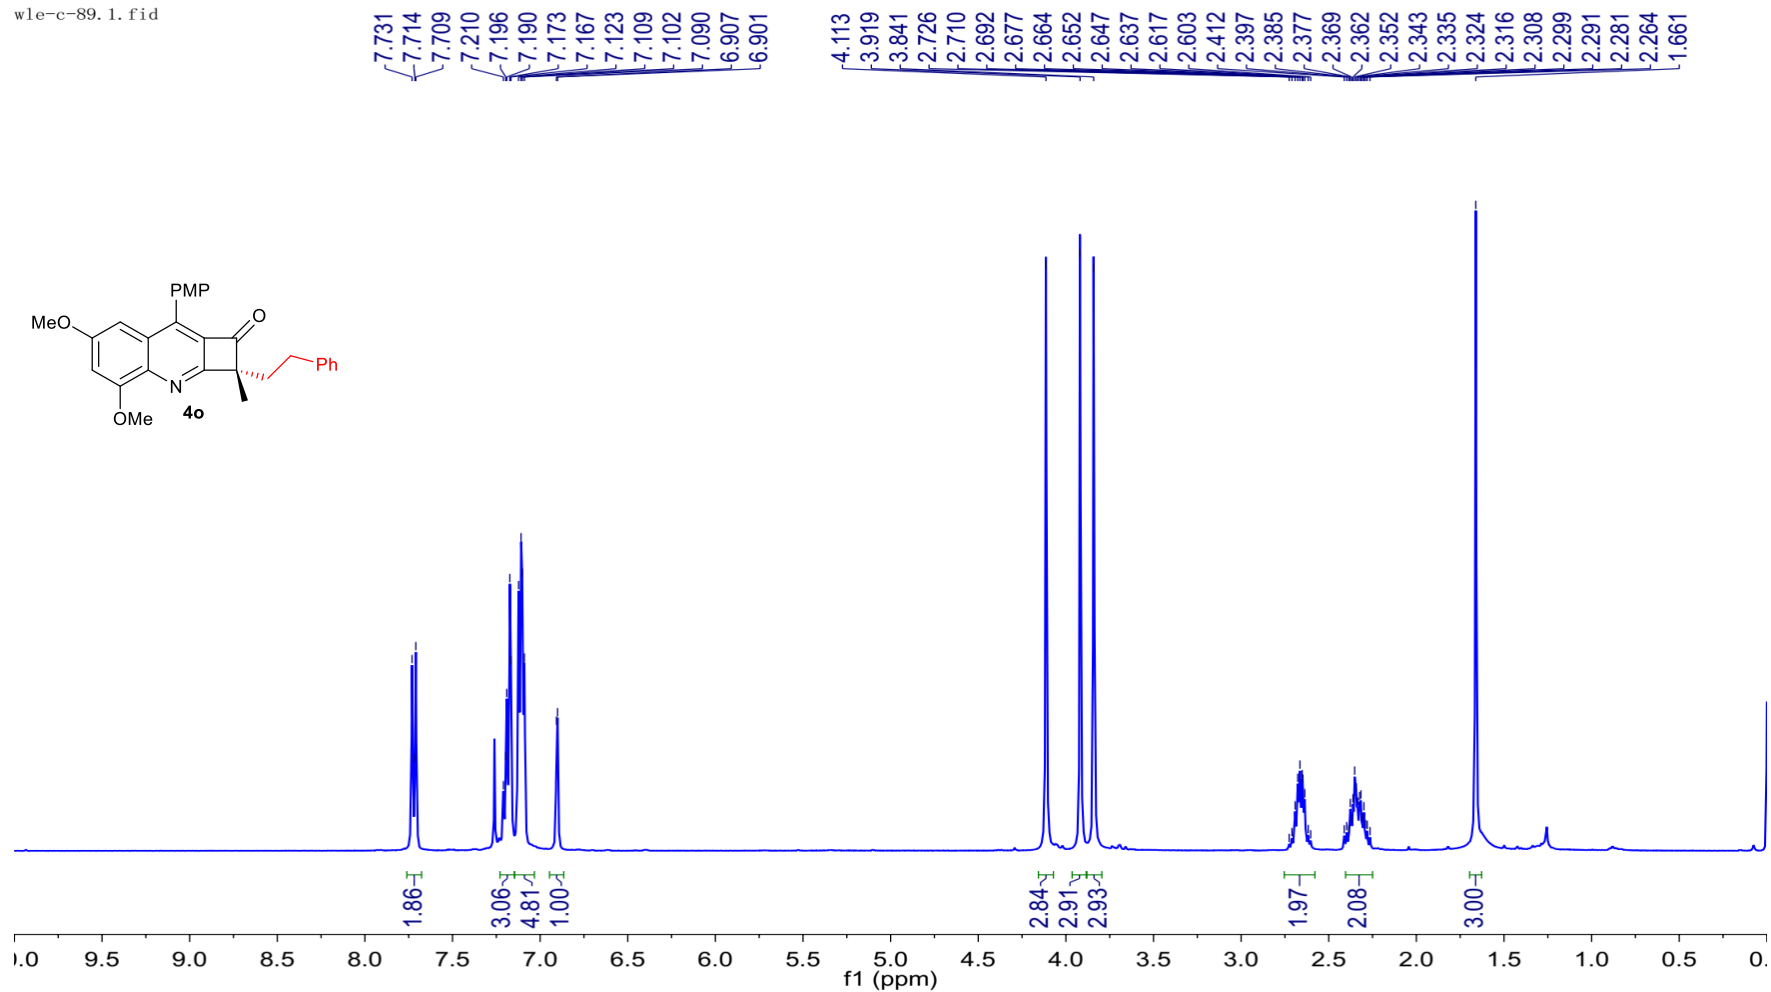



$^{13}\text{C}$  { $^1\text{H}$ } NMR Spectrum (101 MHz, Chloroform-d) of **4o**

w1e-c-90-3-c.1.f1

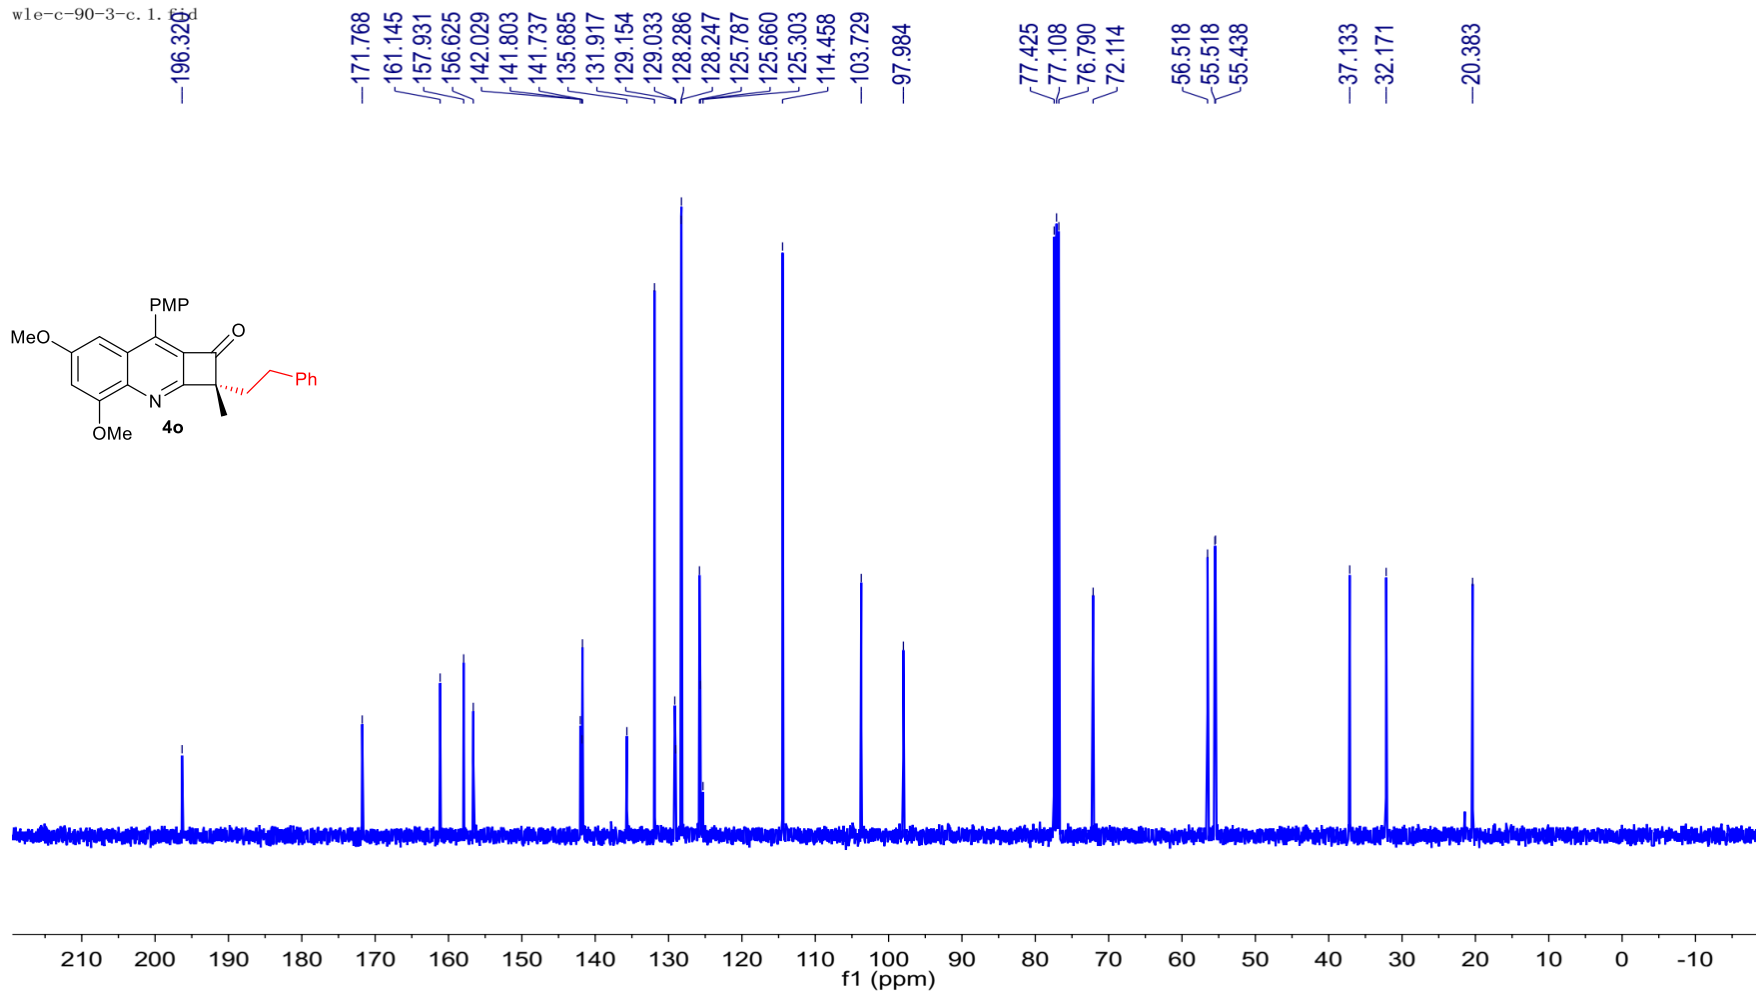

<sup>1</sup>H NMR Spectrum (400 MHz, Chloroform-d) of **4p**

wle-c-84-1.1.fid

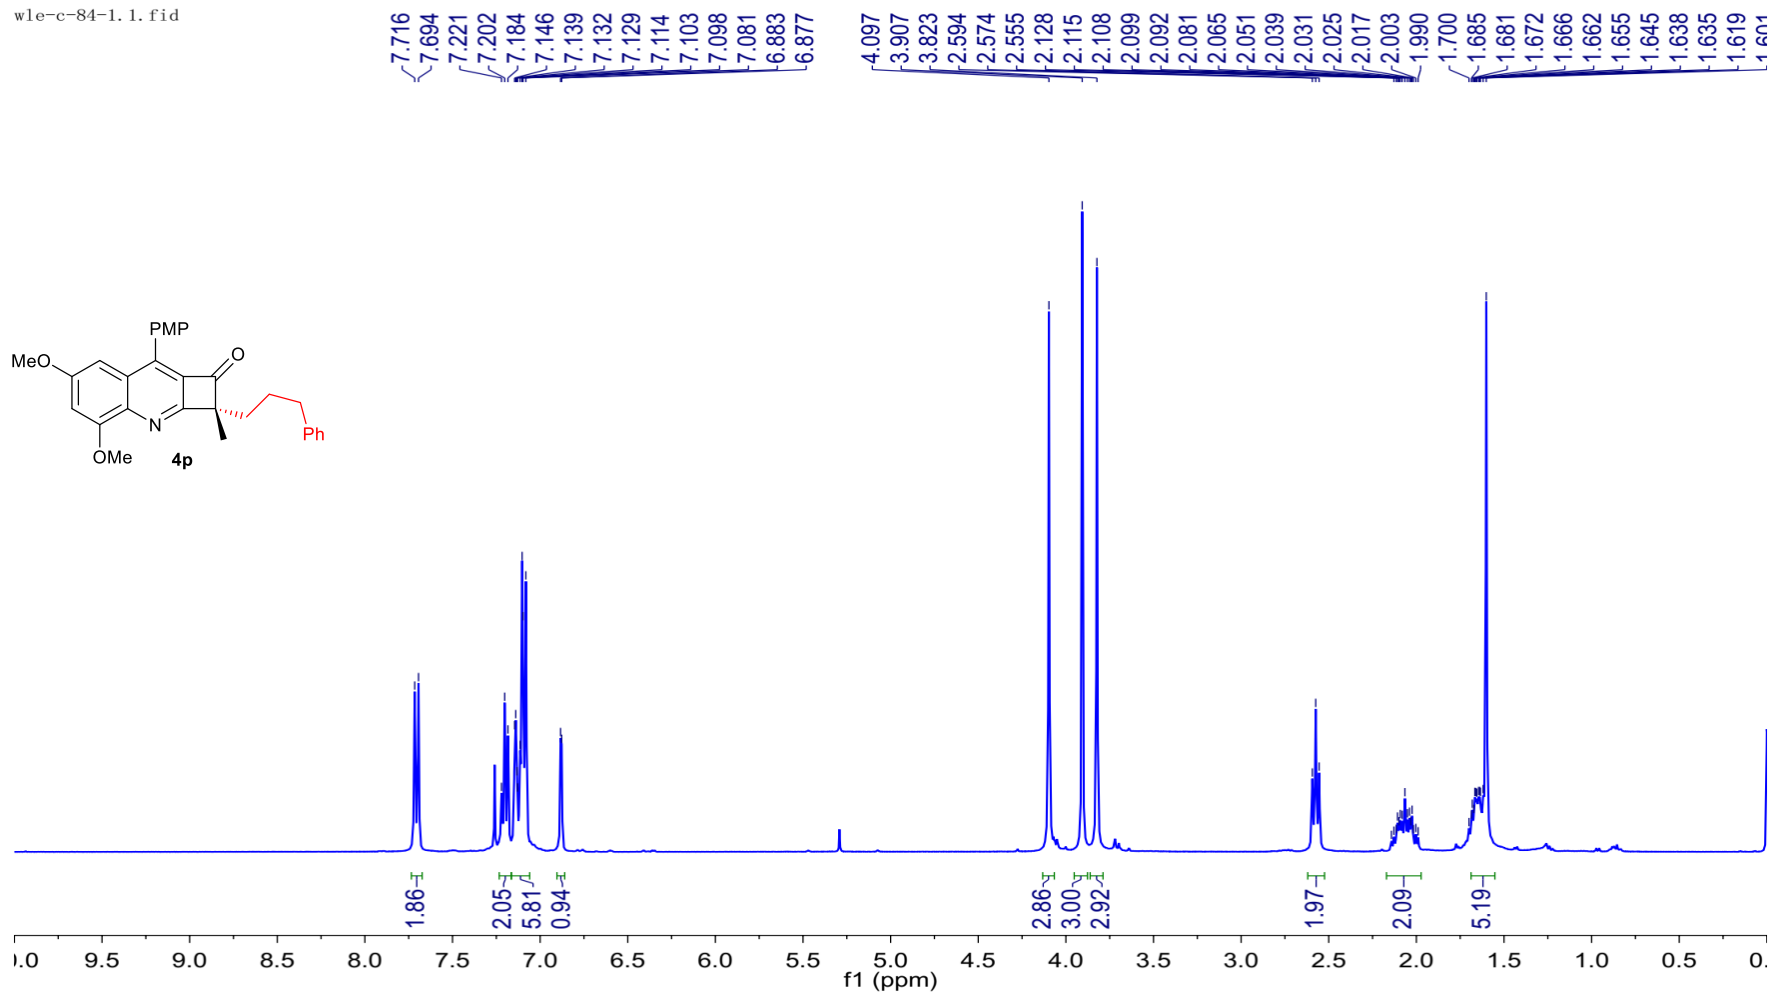

$^{13}\text{C}$  { $^1\text{H}$ } NMR Spectrum (101 MHz, Chloroform-d) of **4p**

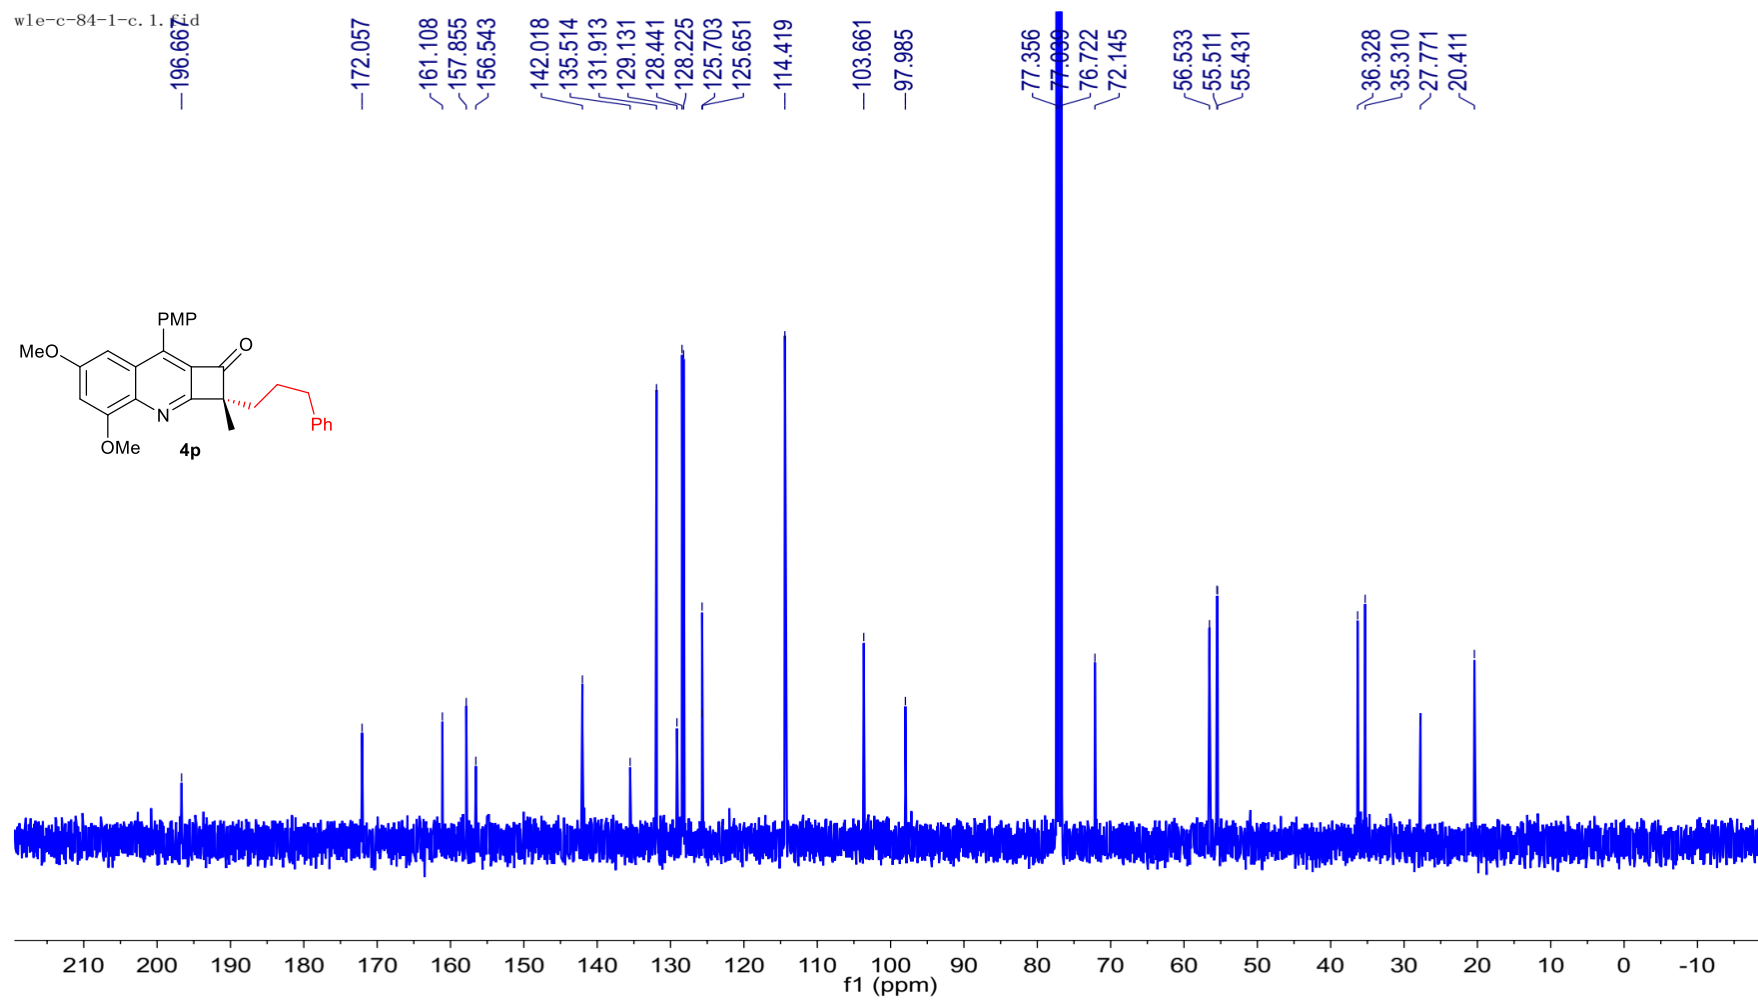

<sup>1</sup>H NMR Spectrum (400 MHz, Chloroform-d) of **4q**

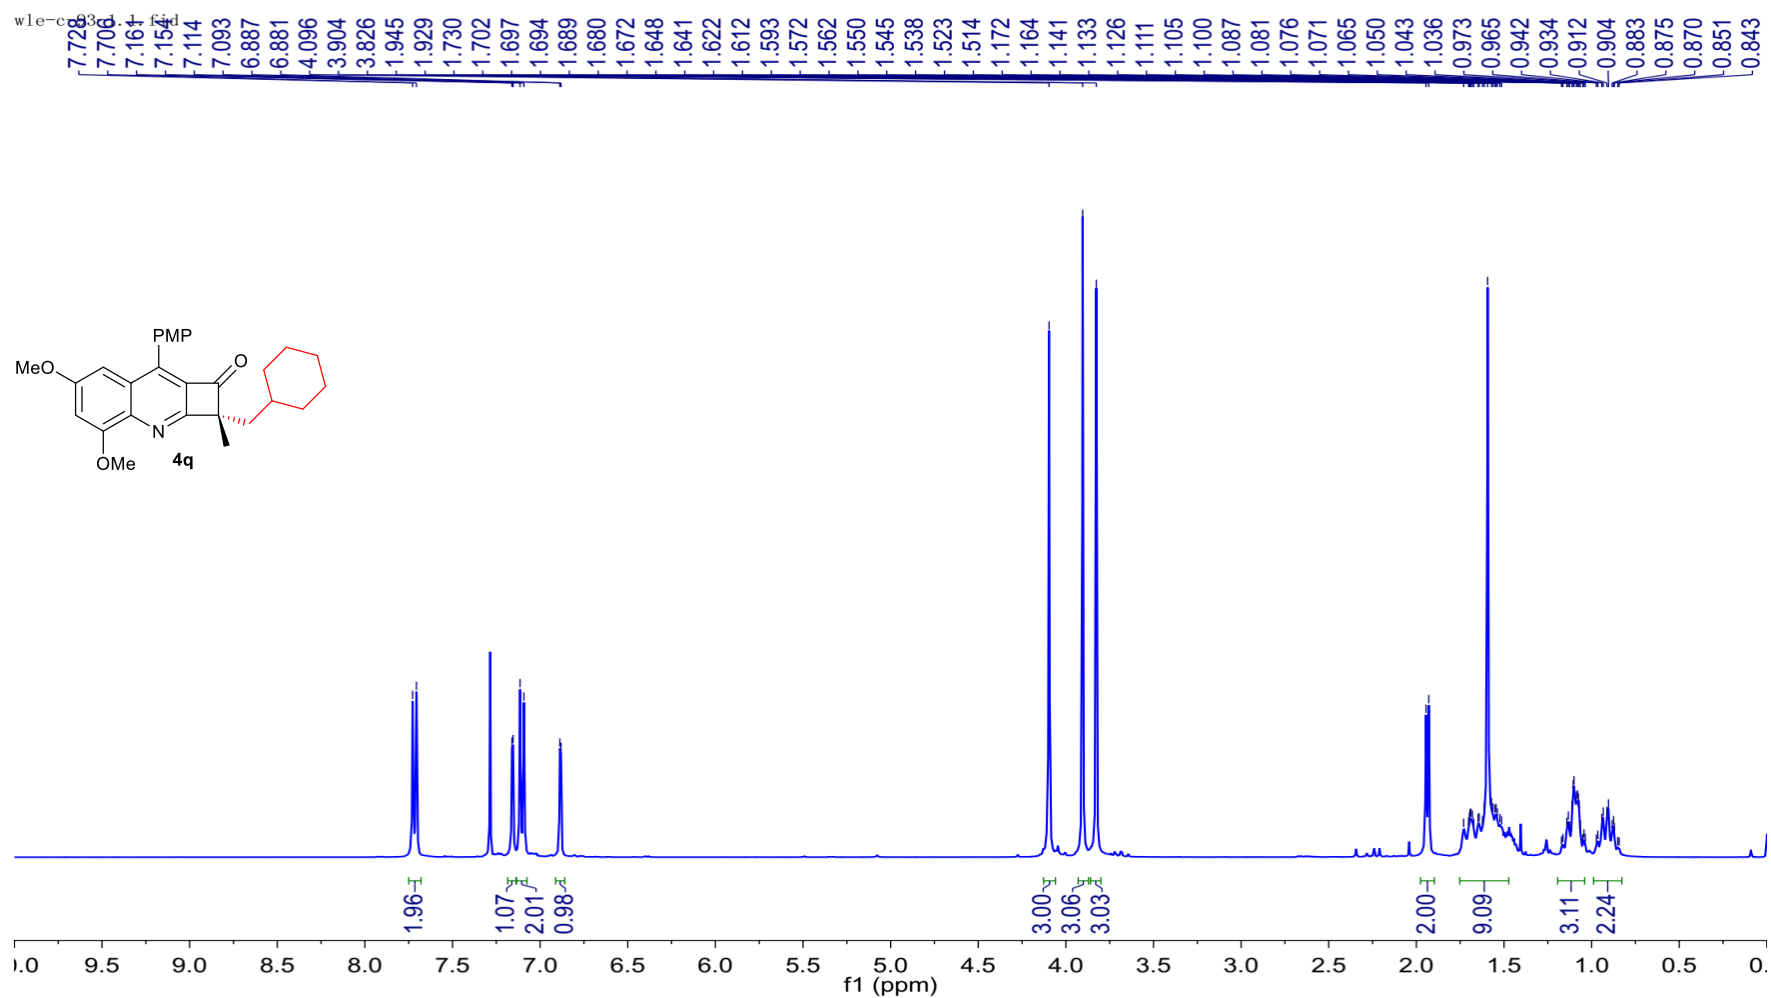

$^{13}\text{C}$   $\{^1\text{H}\}$  NMR Spectrum (101 MHz, Chloroform-d) of **4q**

w1e-c-93-1.2.f1d

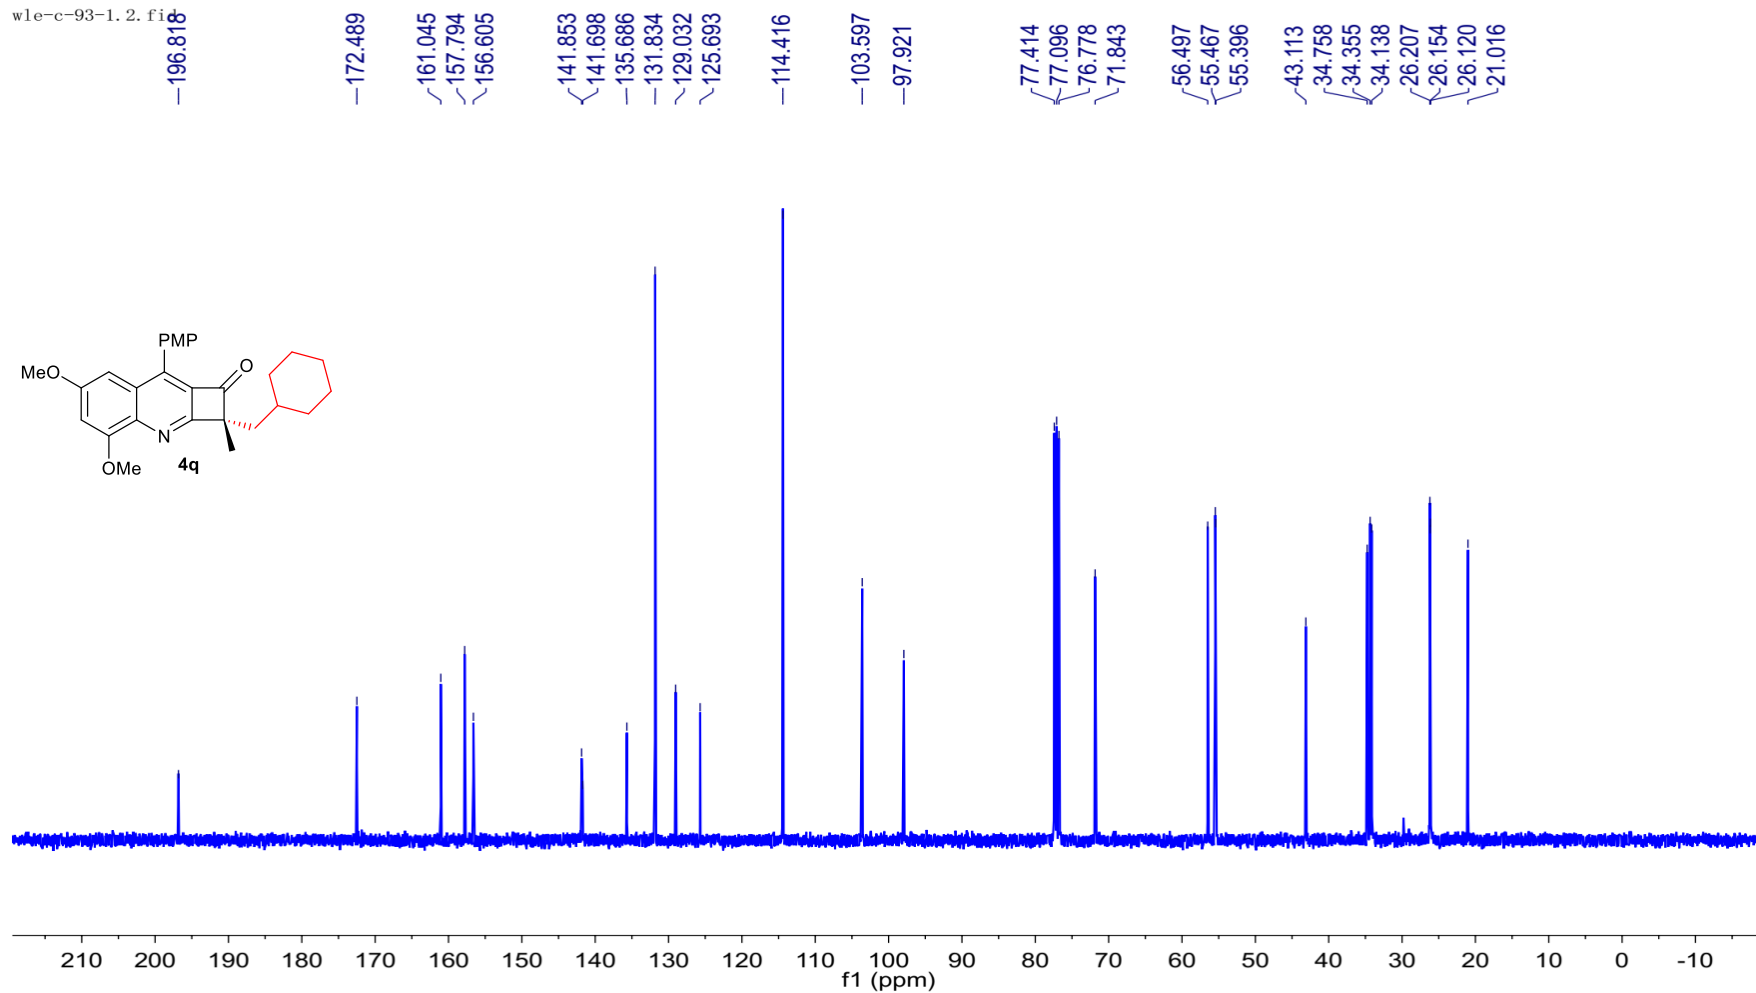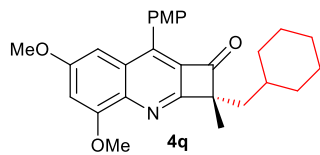

<sup>1</sup>H NMR Spectrum (400 MHz, Chloroform-d) of **4r**

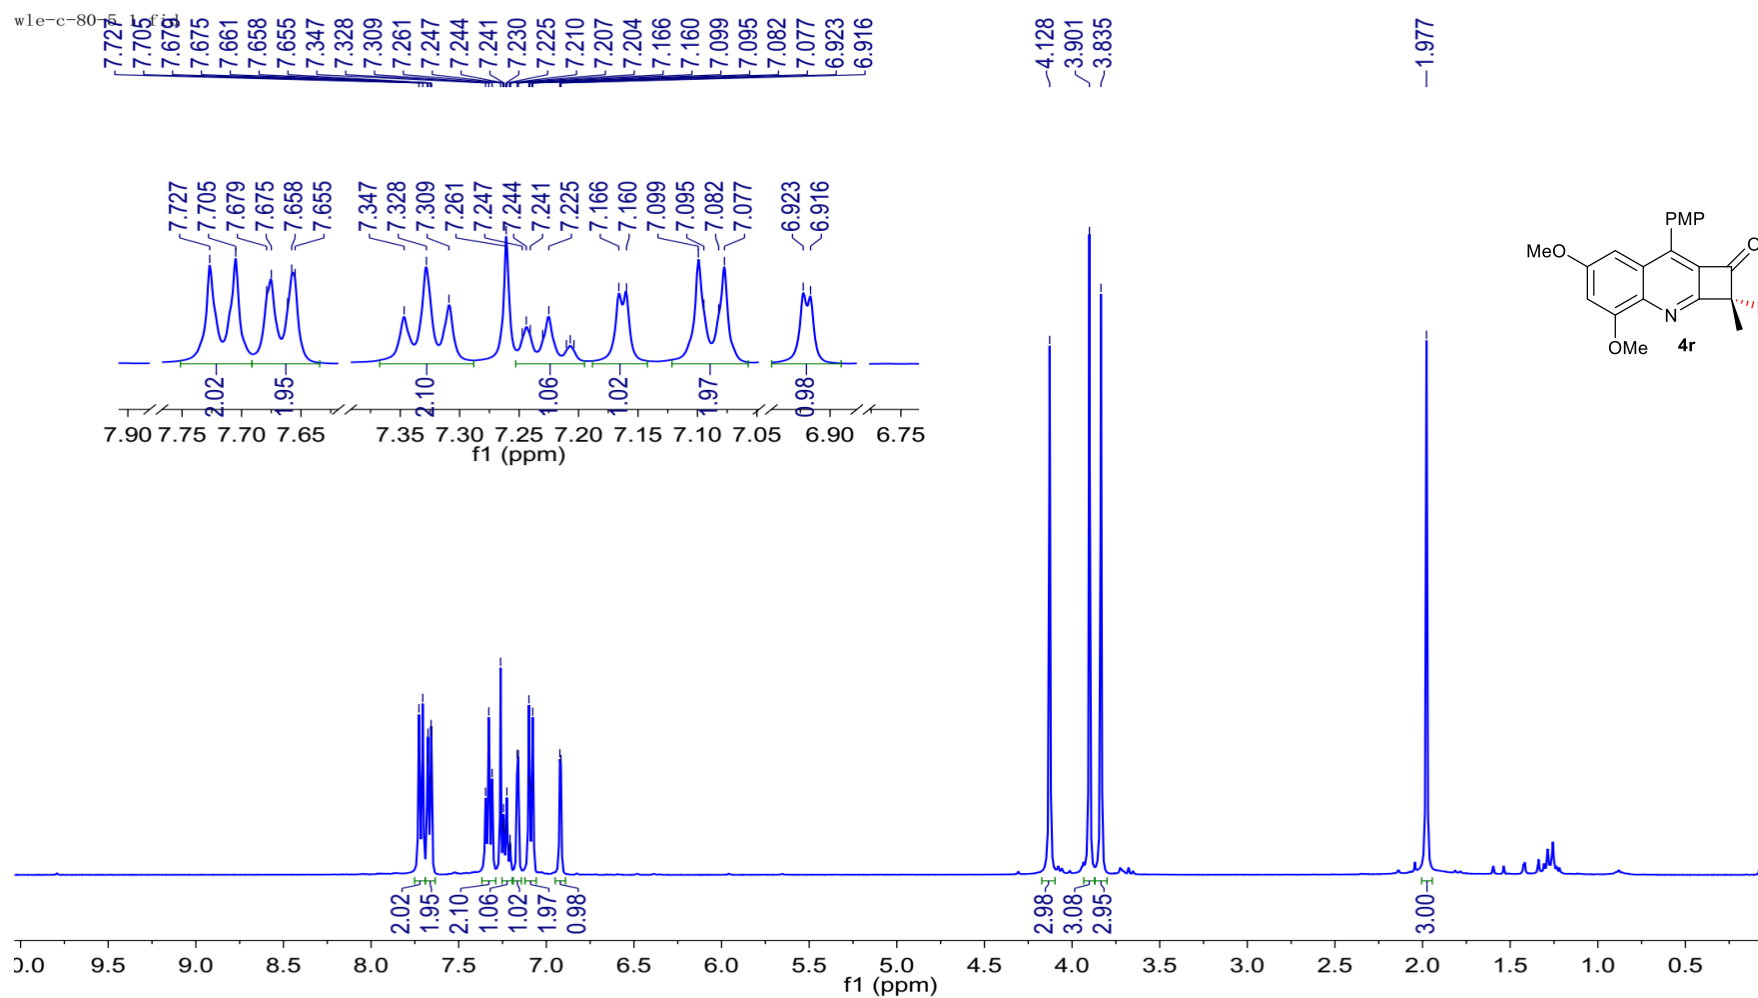

$^{13}\text{C}$   $\{^1\text{H}\}$  NMR Spectrum (101 MHz, Chloroform-d) of **4r**

w1e-c-80-5.2.fid

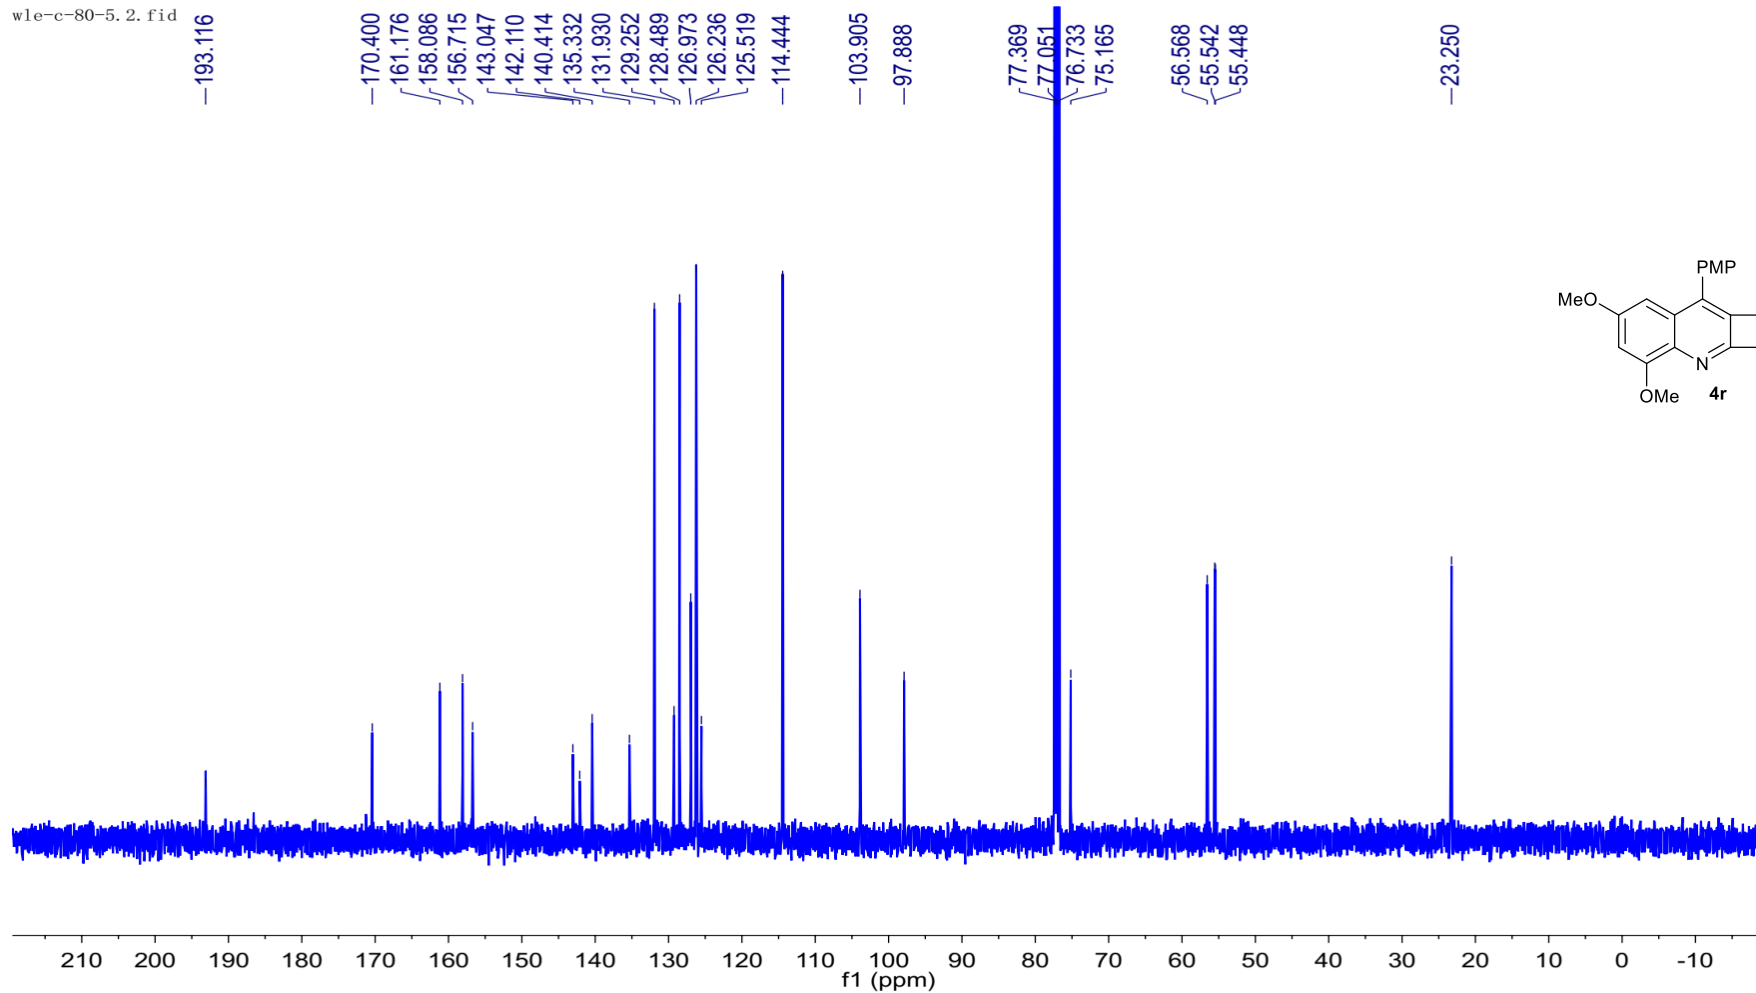

<sup>1</sup>H NMR Spectrum (400 MHz, Chloroform-d) of **5a**

WLE-D-21-P1-4-NOE. 1. fid

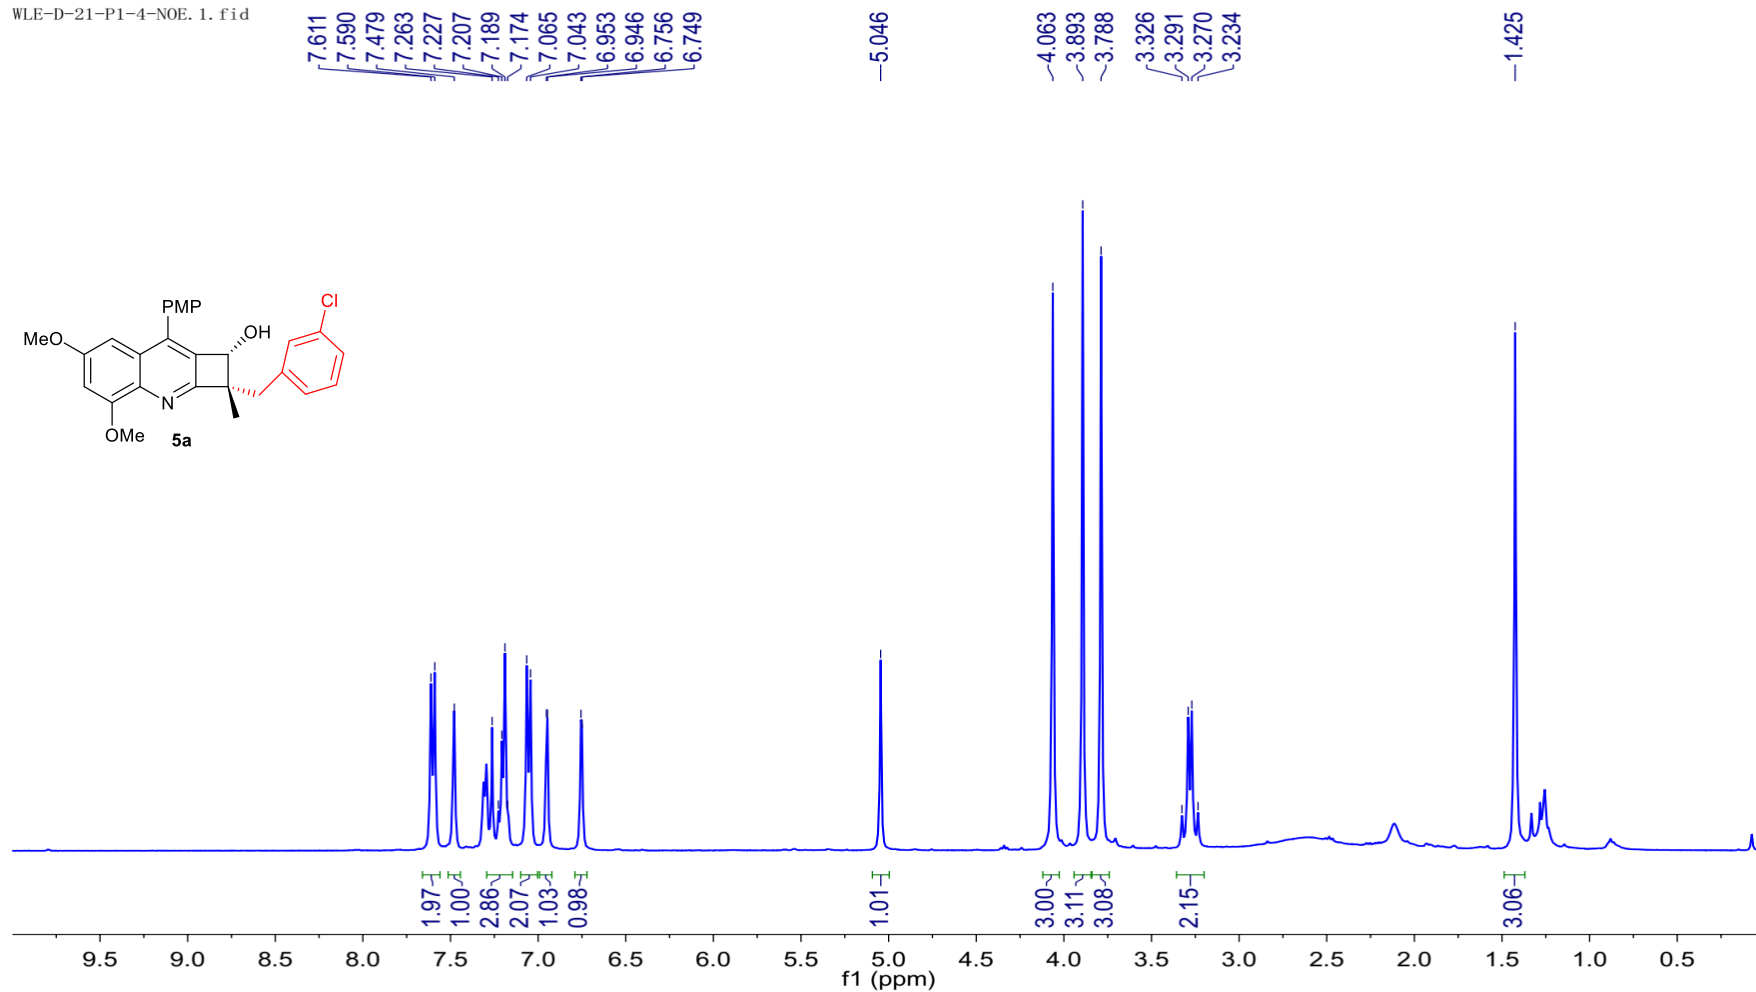



$^{13}\text{C}$   $\{^1\text{H}\}$  NMR Spectrum (101 MHz, Chloroform- $d$ ) of **5a**

WLE-D-21. 2. fid

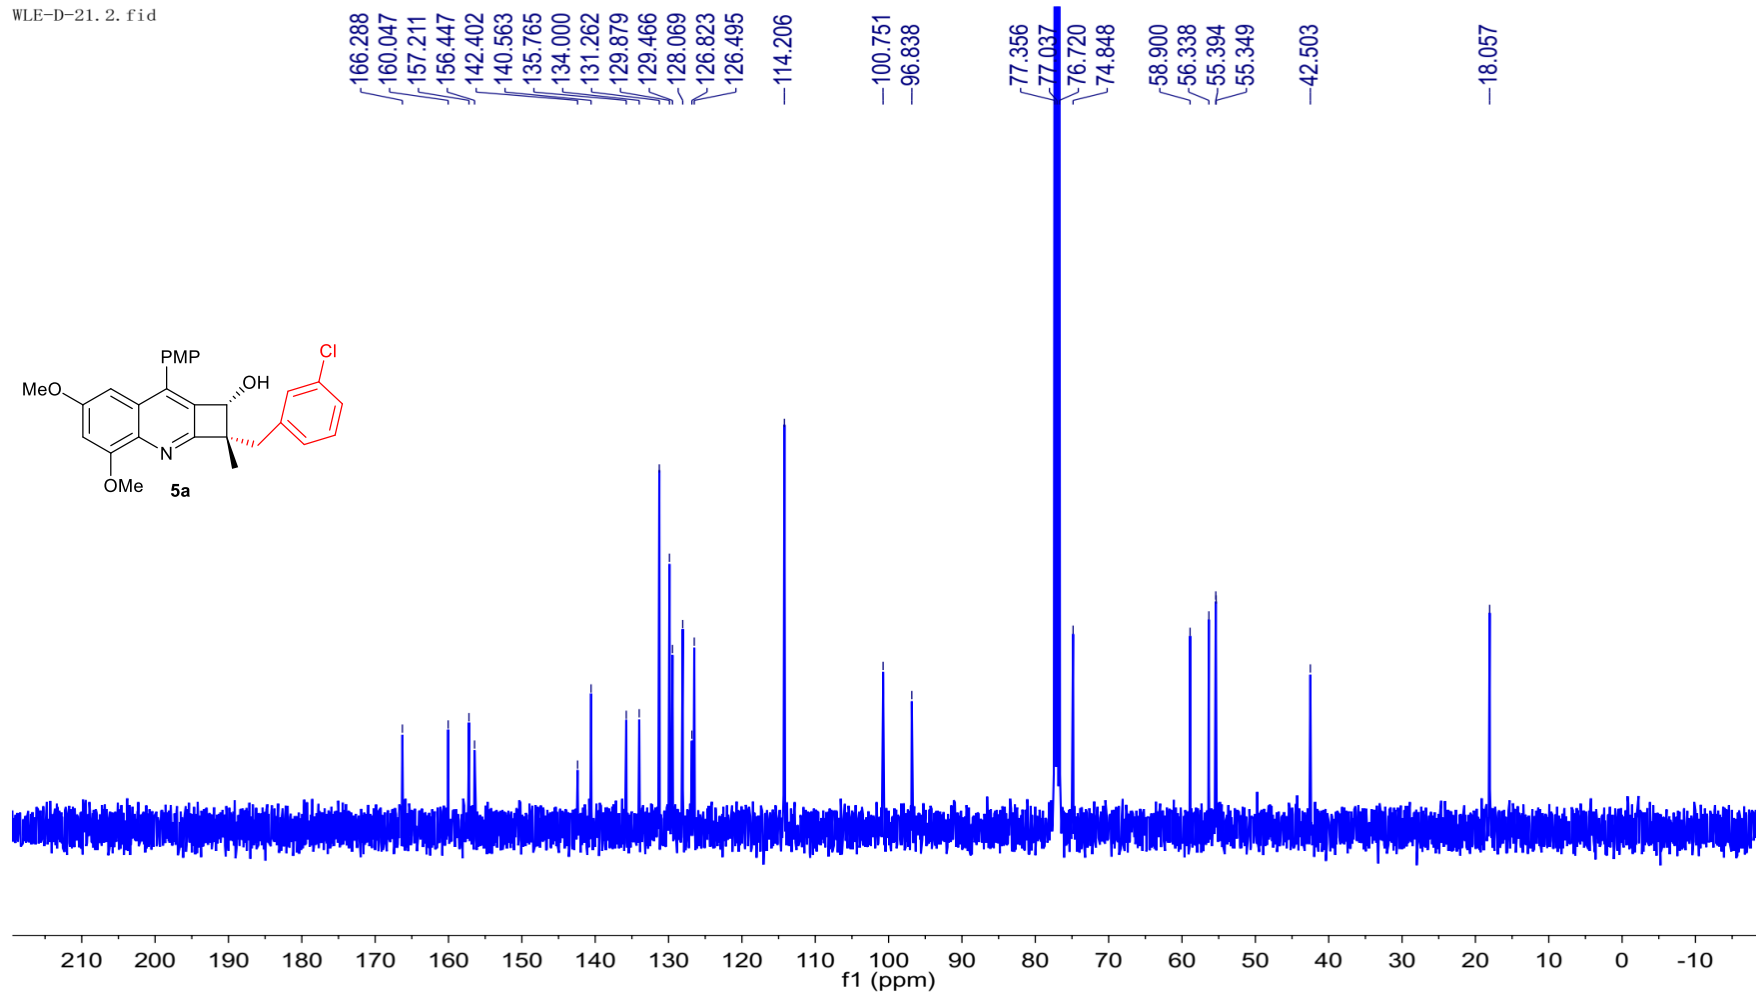

NOESY  $\{^1\text{H}\}$  NMR Spectrum (101 MHz, Chloroform-*d*) of **5a**

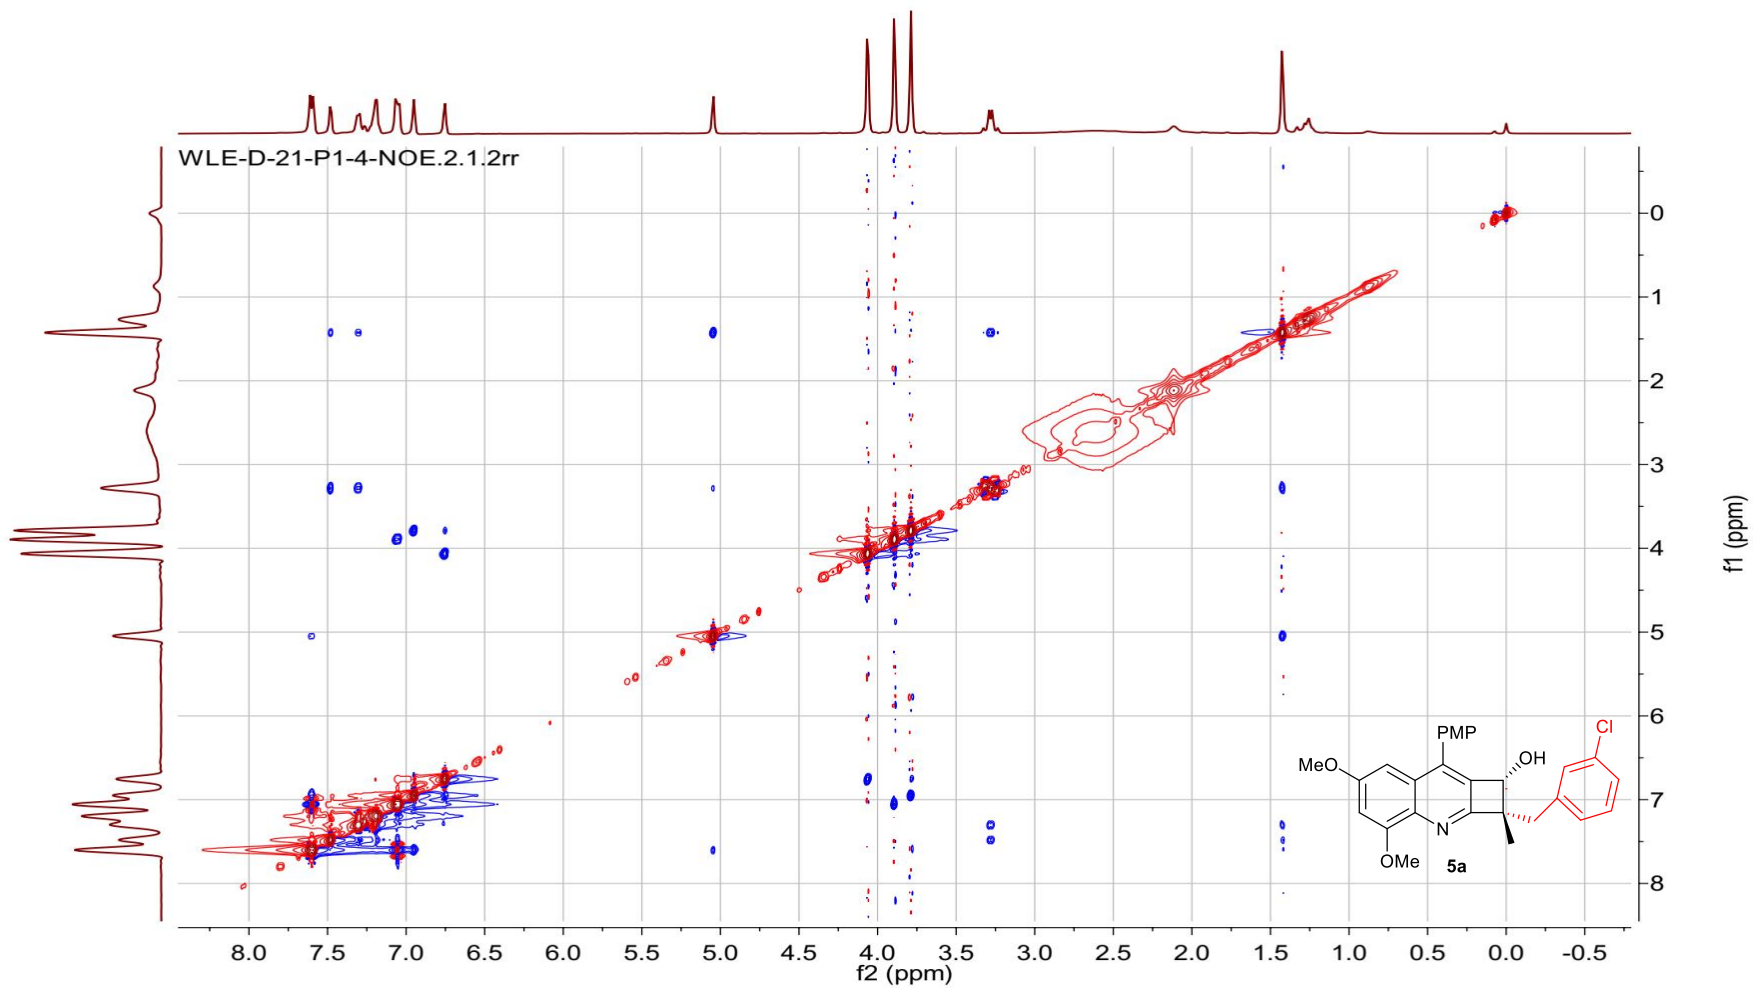

<sup>1</sup>H NMR Spectrum (400 MHz, Chloroform-d) of **5b**

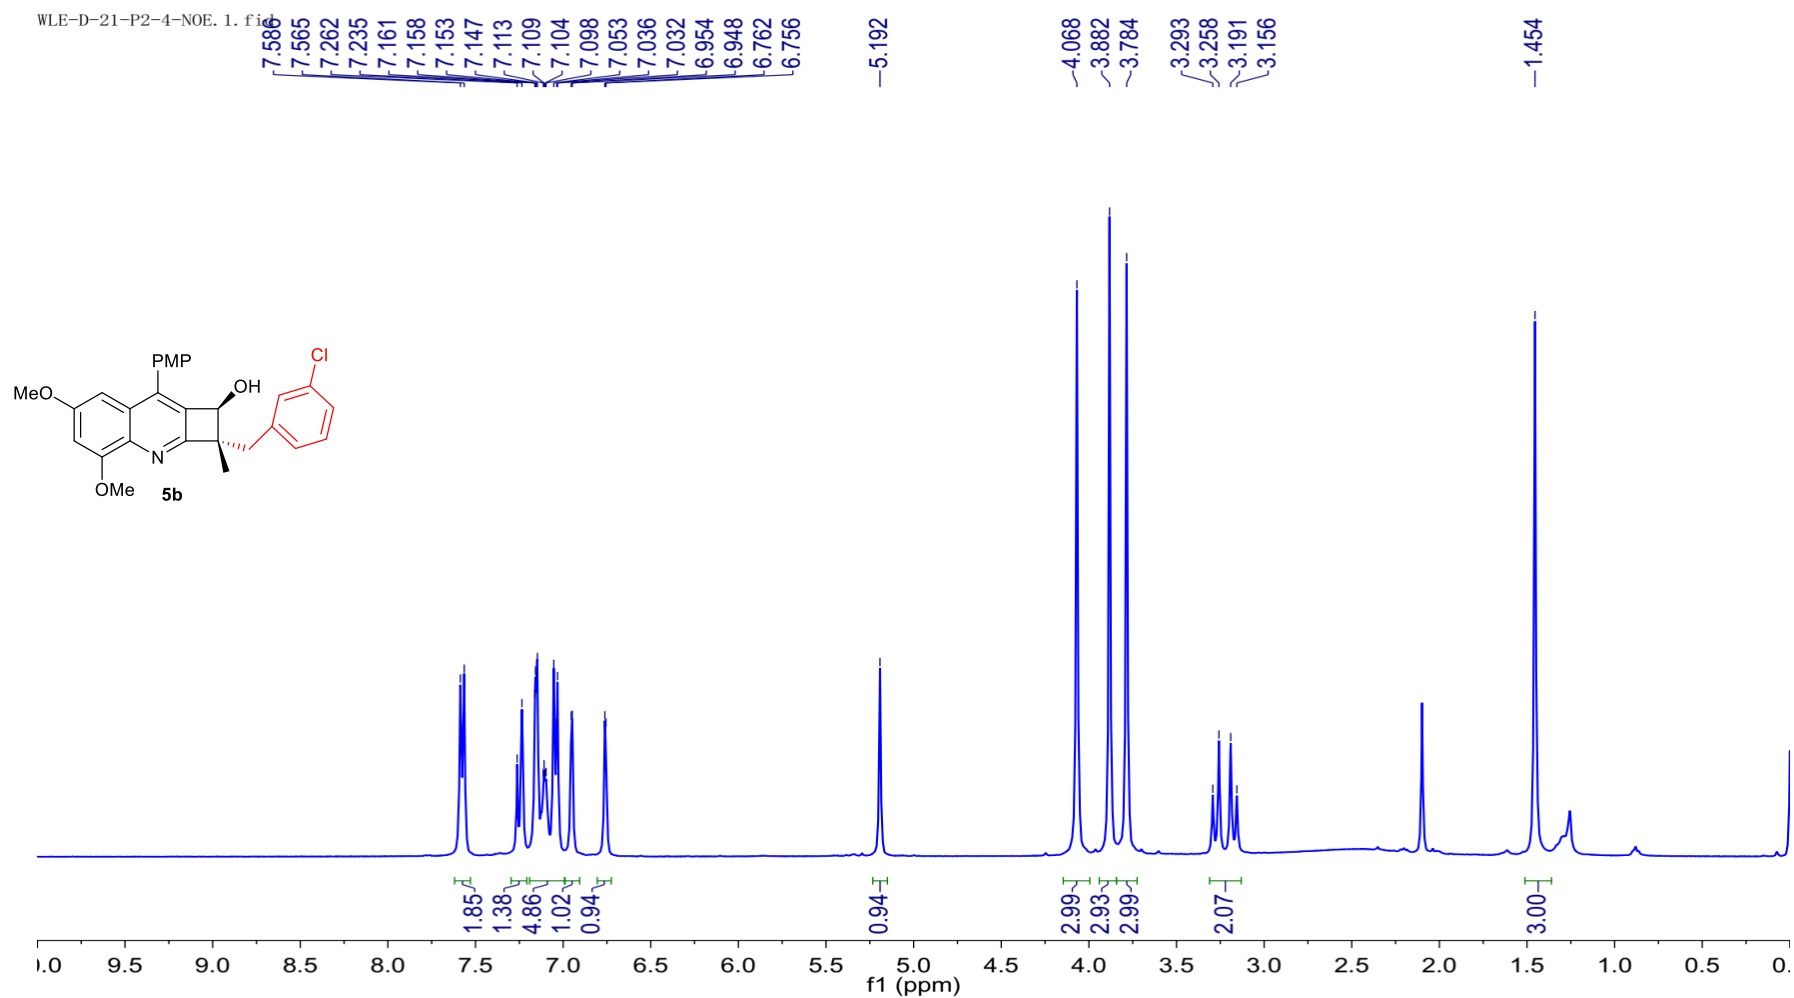

$^{13}\text{C}$   $\{^1\text{H}\}$  NMR Spectrum (101 MHz, Chloroform-d) of **5b**

WLE-D-21-P2-4-C. 1. fid

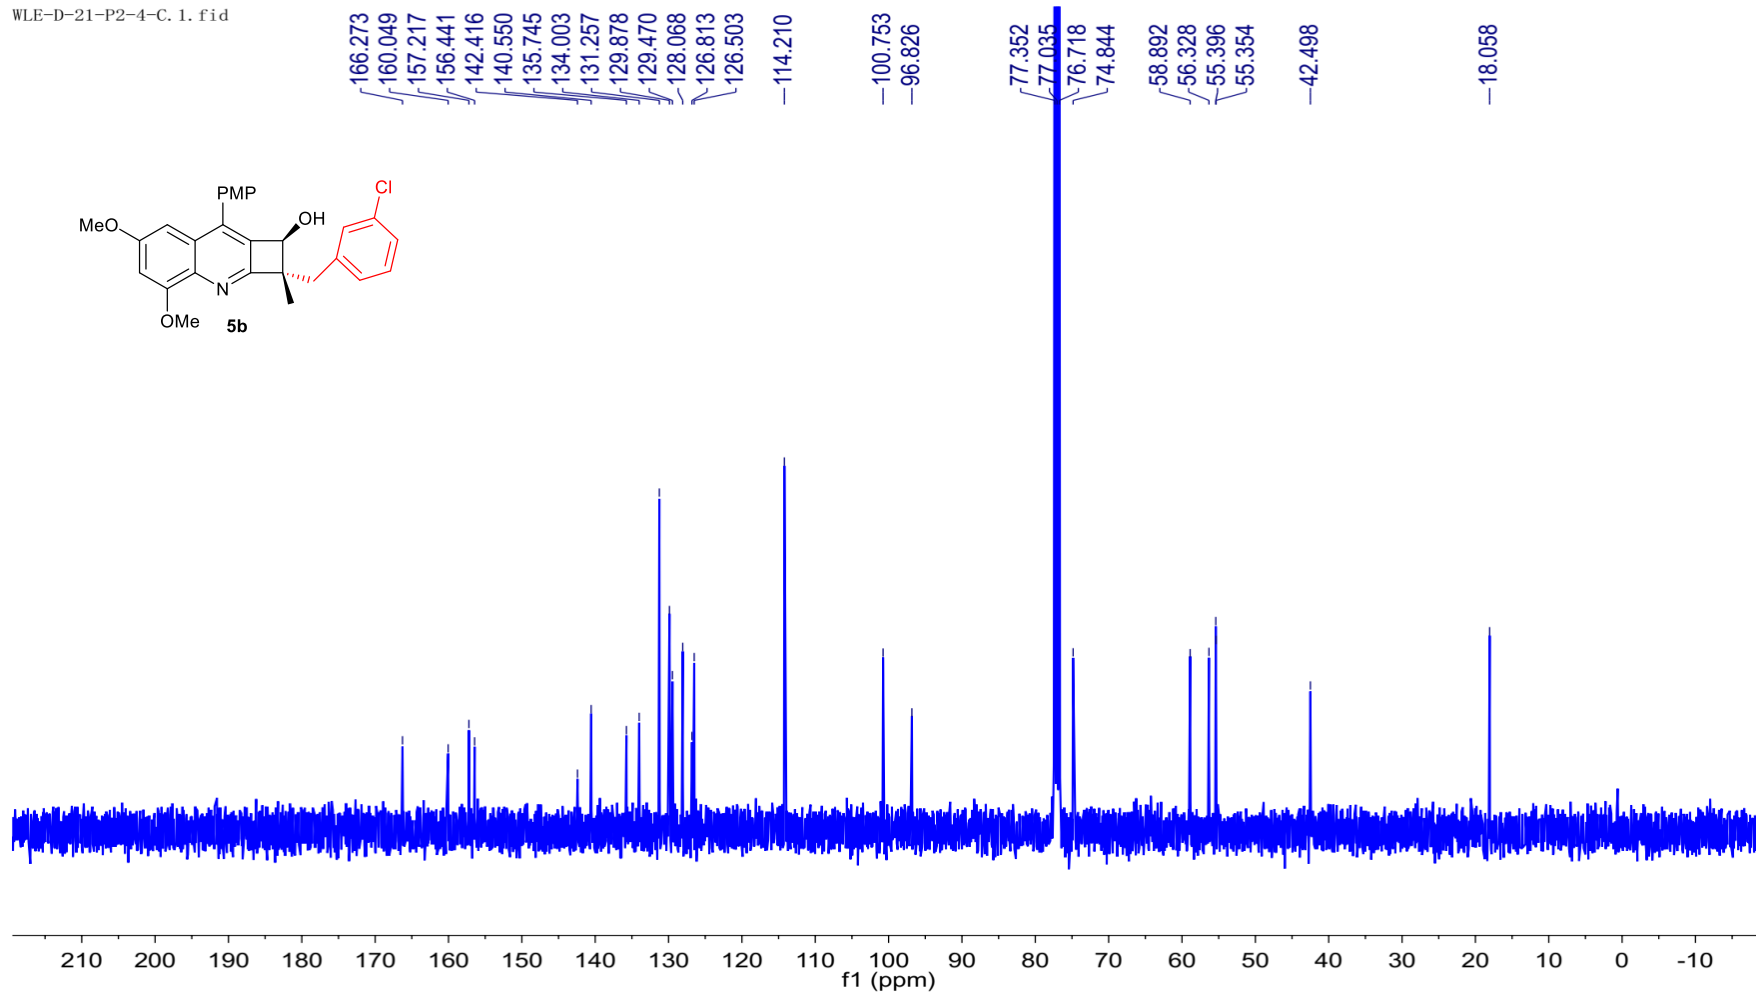

NOESY  $\{^1\text{H}\}$  NMR Spectrum (101 MHz, Chloroform-*d*) of **5b**

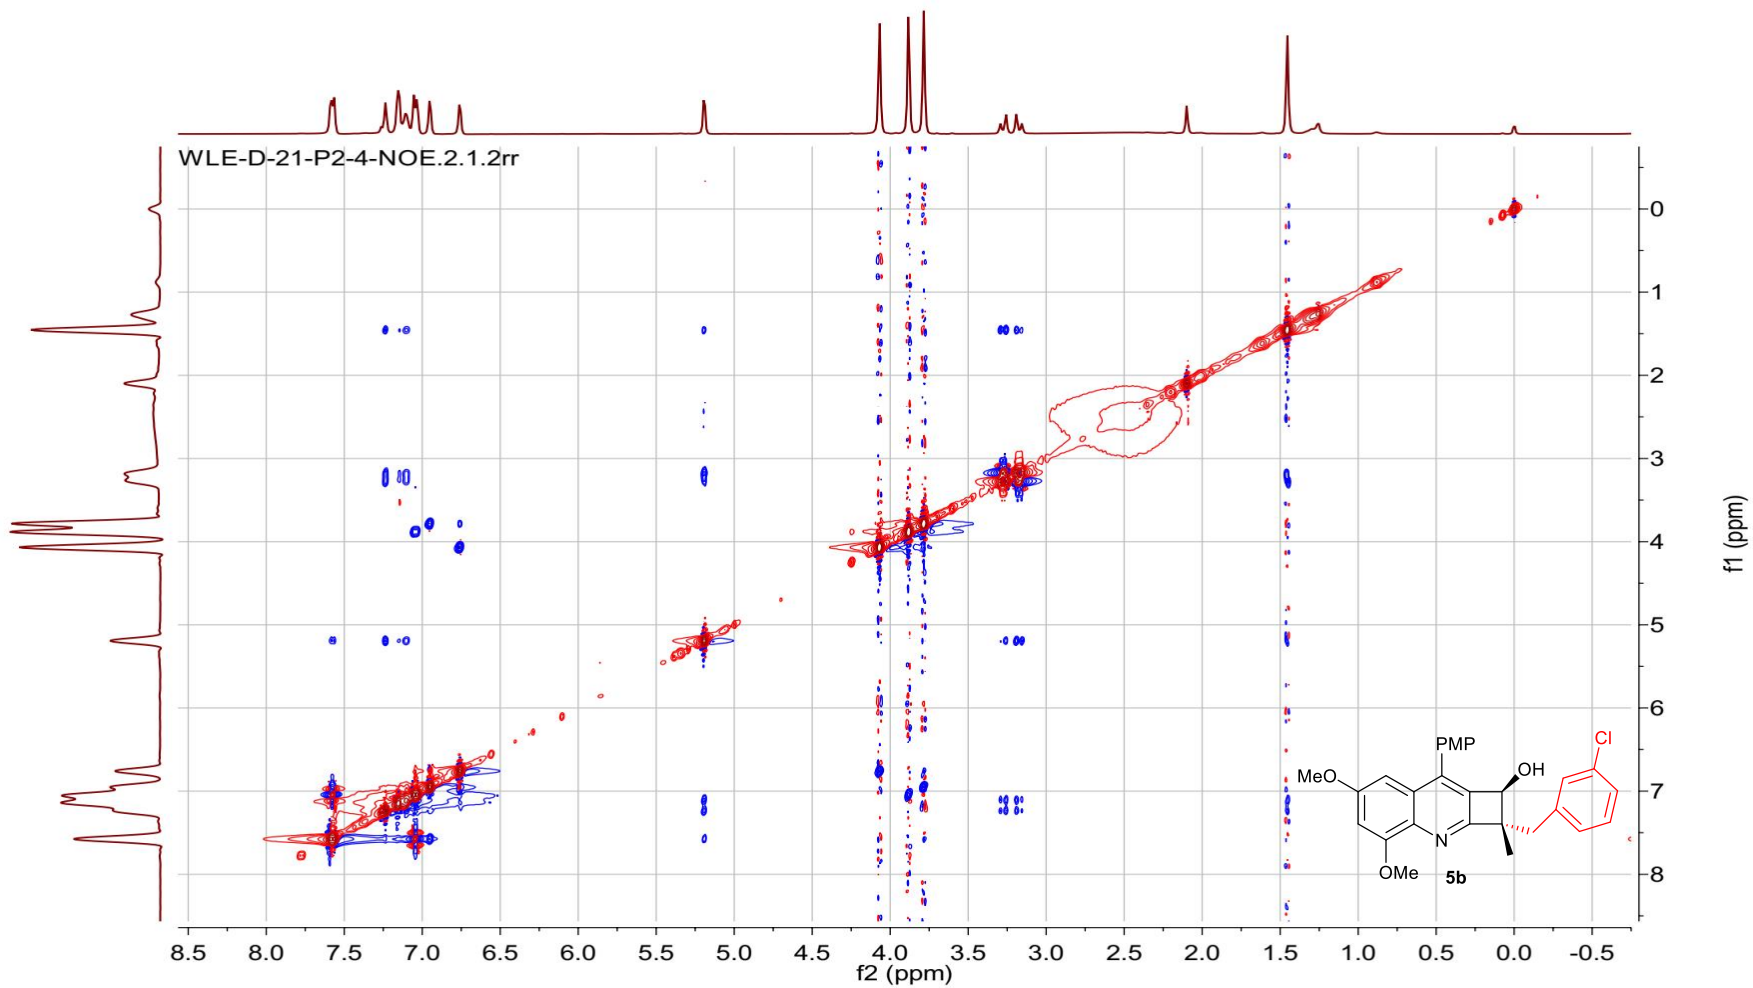

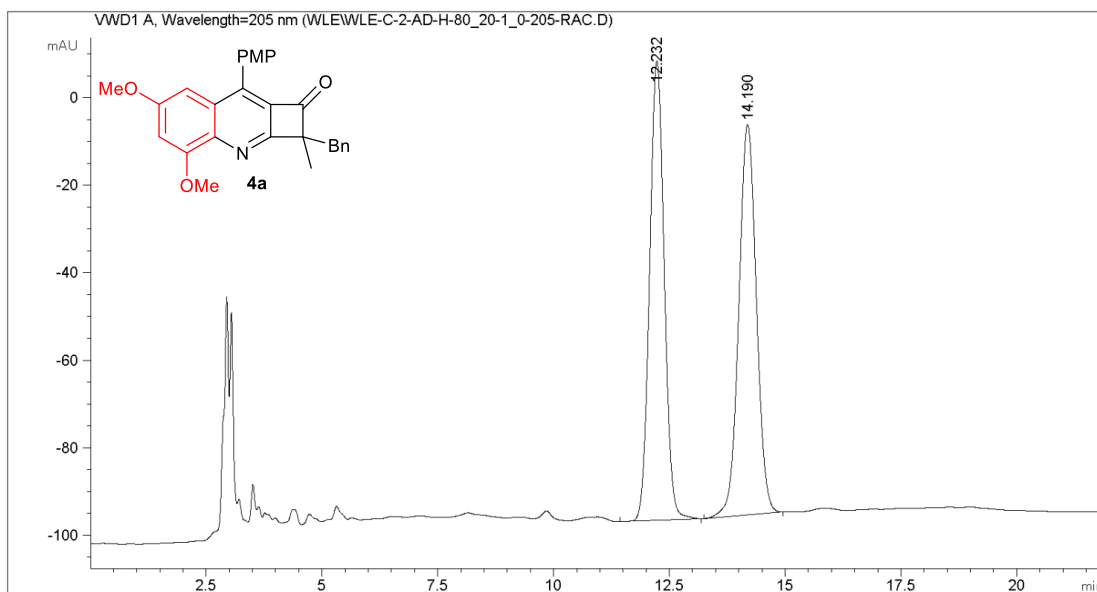

| No. | Ret. Time [min] | Type | Width [min] | Area [mAU*s] | Height [mAU] | Area %  |
|-----|-----------------|------|-------------|--------------|--------------|---------|
| 1   | 12.232          | BB   | 0.3411      | 2304.74463   | 105.00569    | 49.4563 |
| 2   | 14.190          | BB   | 0.4078      | 2355.41602   | 89.28214     | 50.5437 |

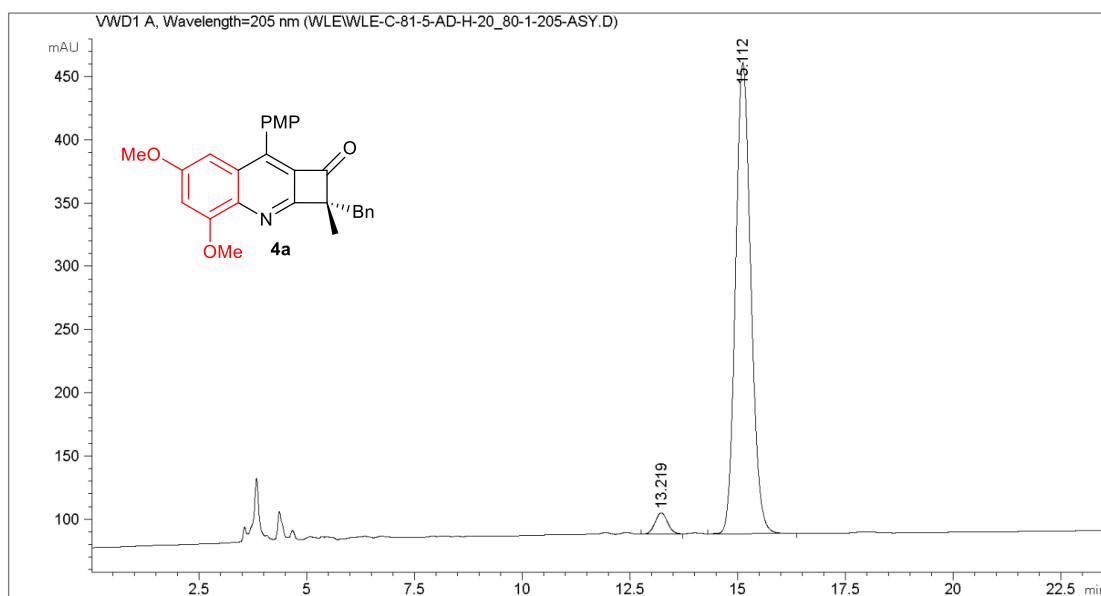

| No. | Ret. Time [min] | Type | Width [min] | Area [mAU*s] | Height [mAU] | Area %  |
|-----|-----------------|------|-------------|--------------|--------------|---------|
| 1   | 13.219          | BB   | 0.3130      | 336.81229    | 16.79228     | 3.5333  |
| 2   | 15.112          | BB   | 0.3821      | 9195.75977   | 372.34534    | 96.4667 |

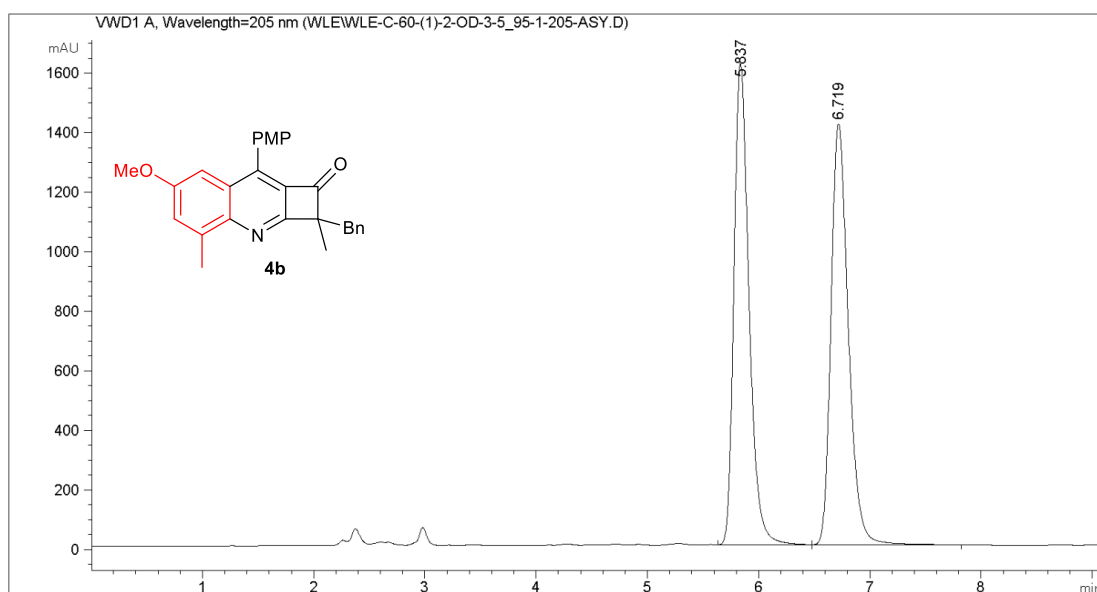

| No. | Ret. Time [min] | Type | Width [min] | Area [mAU*s] | Height [mAU] | Area %  |
|-----|-----------------|------|-------------|--------------|--------------|---------|
| 1   | 5.837           | VB   | 0.1438      | 1.52158e4    | 1616.64832   | 49.8700 |
| 2   | 6.719           | BV   | 0.1663      | 1.52951e4    | 1412.72034   | 50.1300 |

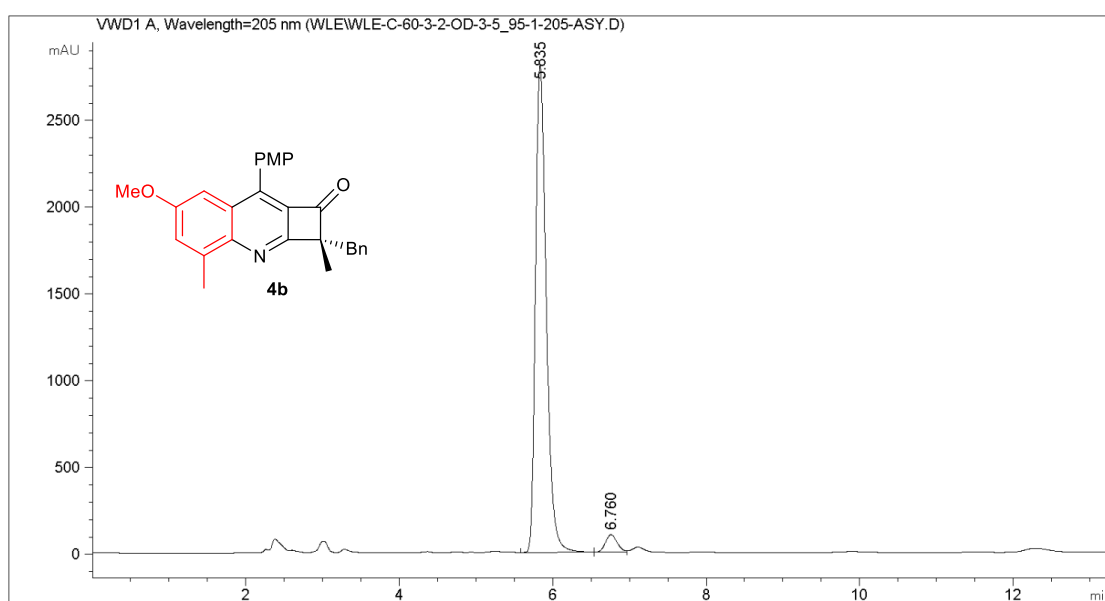

| No. | Ret. Time [min] | Type | Width [min] | Area [mAU*s] | Height [mAU] | Area %  |
|-----|-----------------|------|-------------|--------------|--------------|---------|
| 1   | 5.835           | BB   | 0.1508      | 2.73584e4    | 2804.25488   | 96.2227 |
| 2   | 6.760           | BV   | 0.1655      | 1073.97205   | 100.66934    | 3.7773  |

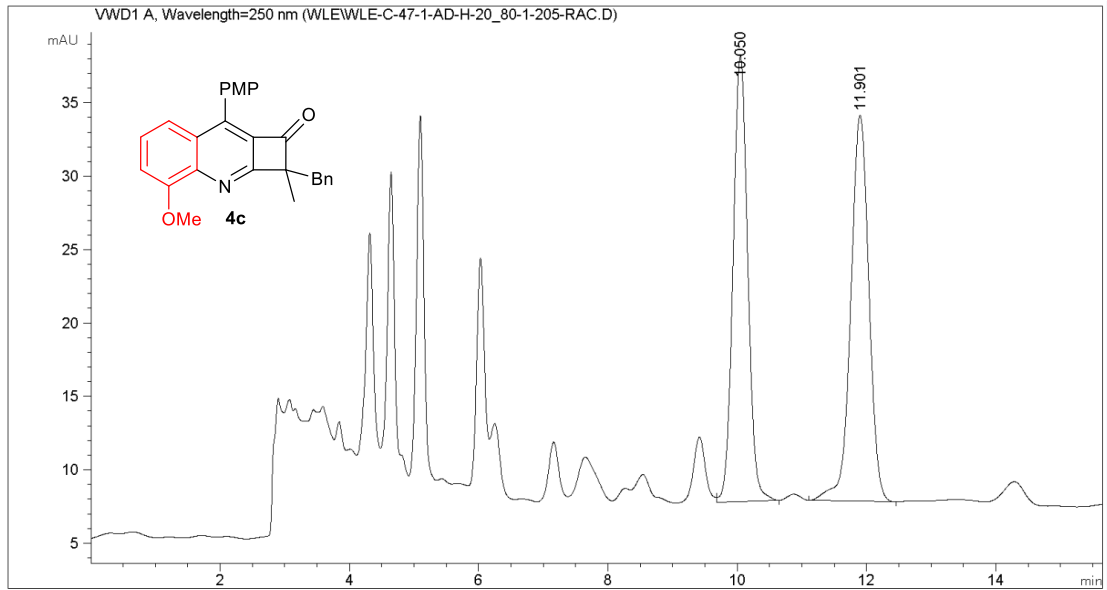

| No. | Ret. Time [min] | Type | Width [min] | Area [mAU*s] | Height [mAU] | Area %  |
|-----|-----------------|------|-------------|--------------|--------------|---------|
| 1   | 10.050          | VB   | 0.2450      | 478.90683    | 30.37174     | 48.1748 |
| 2   | 11.901          | BB   | 0.3025      | 515.19507    | 26.30906     | 51.8252 |

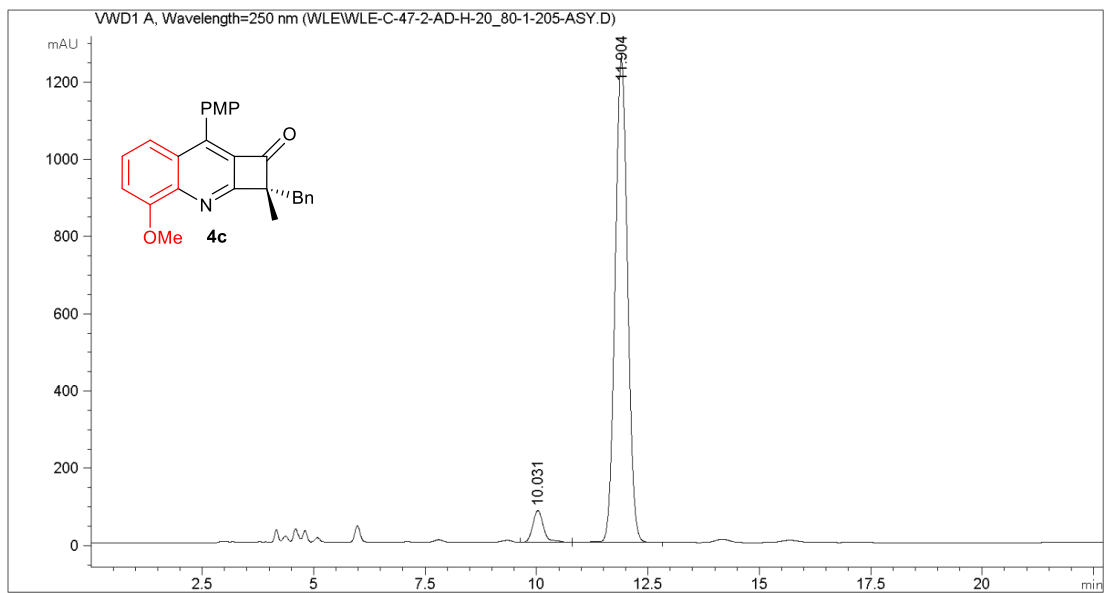

| No. | Ret. Time [min] | Type | Width [min] | Area [mAU*s] | Height [mAU] | Area %  |
|-----|-----------------|------|-------------|--------------|--------------|---------|
| 1   | 10.031          | VB   | 0.2585      | 1396.74243   | 82.94065     | 5.4405  |
| 2   | 11.904          | BB   | 0.3036      | 2.42765e4    | 1249.91992   | 94.5595 |



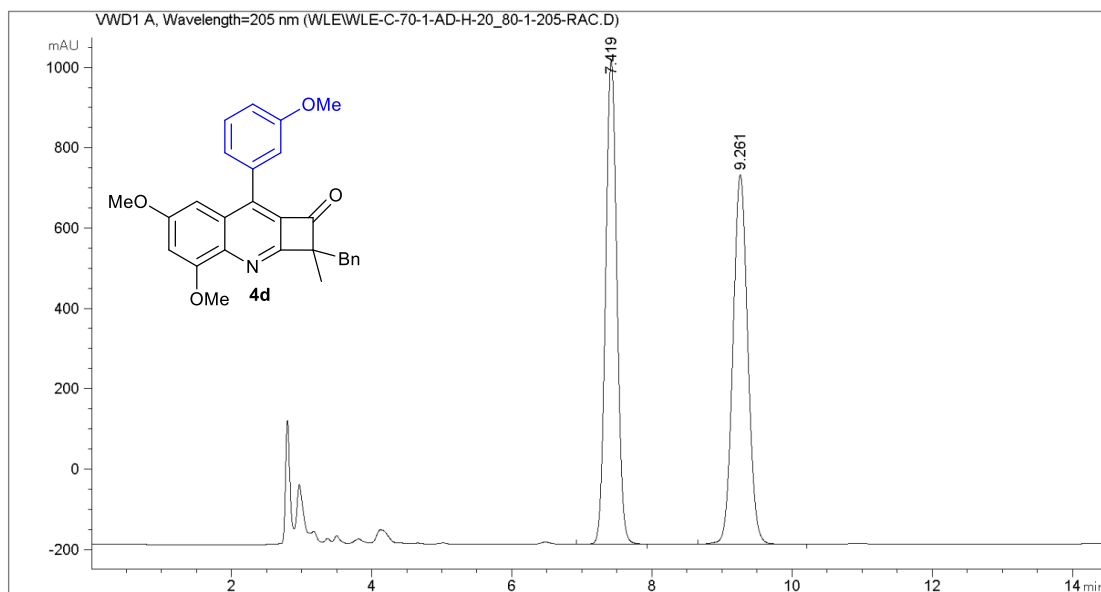

| No. | Ret. Time [min] | Type | Width [min] | Area [mAU*s] | Height [mAU] | Area %  |
|-----|-----------------|------|-------------|--------------|--------------|---------|
| 1   | 7.419           | BV   | 0.1722      | 1.33246e4    | 1203.21643   | 49.6704 |
| 2   | 9.261           | VB   | 0.2282      | 1.35014e4    | 920.19501    | 50.3296 |

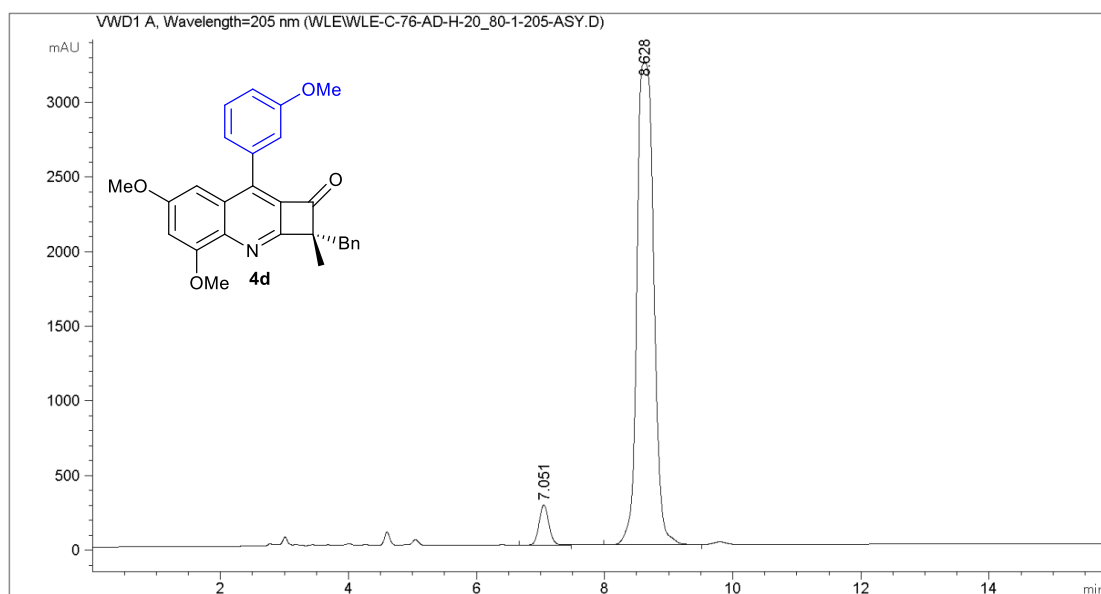

| No. | Ret. Time [min] | Type | Width [min] | Area [mAU*s] | Height [mAU] | Area %  |
|-----|-----------------|------|-------------|--------------|--------------|---------|
| 1   | 7.051           | BV   | 0.1637      | 2823.65234   | 268.46362    | 4.6038  |
| 2   | 8.628           | BV   | 0.2845      | 5.85089e4    | 3227.43115   | 95.3962 |

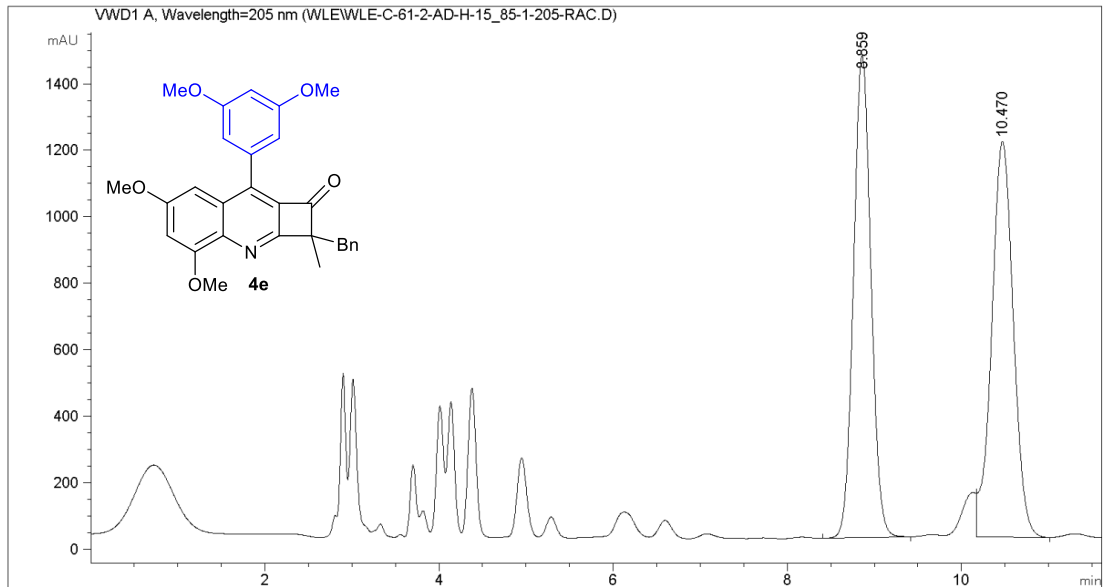

| No. | Ret. Time [min] | Type | Width [min] | Area [mAU*s] | Height [mAU] | Area %  |
|-----|-----------------|------|-------------|--------------|--------------|---------|
| 1   | 8.859           | BB   | 0.2164      | 2.01709e4    | 1449.20459   | 49.4746 |
| 2   | 10.470          | VB   | 0.2668      | 2.05993e4    | 1191.01147   | 50.5254 |

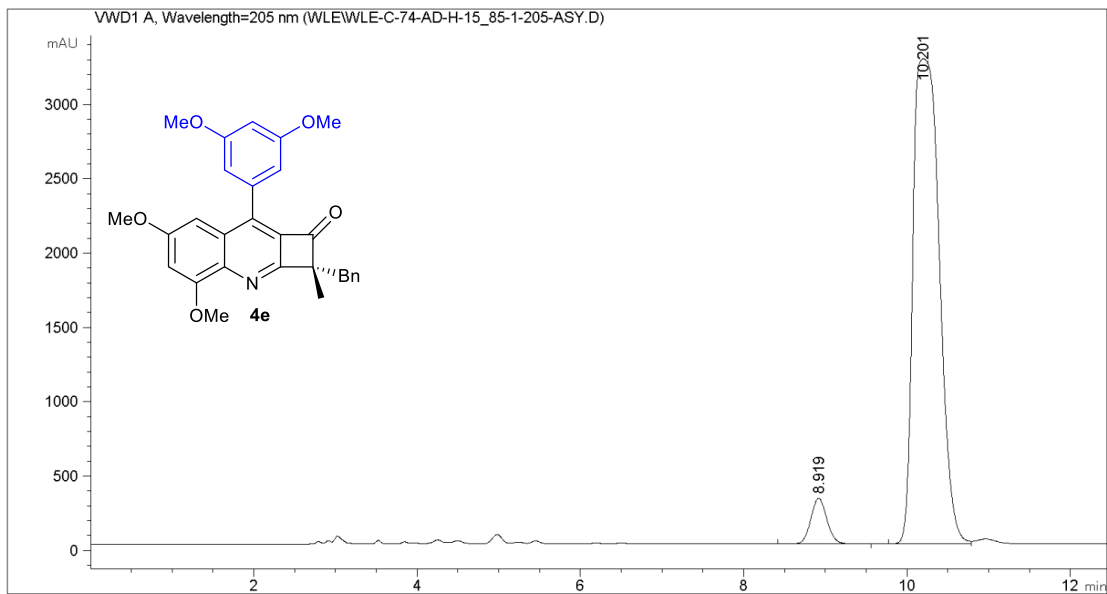

| No. | Ret. Time [min] | Type | Width [min] | Area [mAU*s] | Height [mAU] | Area %  |
|-----|-----------------|------|-------------|--------------|--------------|---------|
| 1   | 8.919           | BB   | 0.2117      | 4174.72412   | 306.81473    | 5.4208  |
| 2   | 10.201          | BV   | 0.3566      | 7.28380e4    | 3261.27515   | 94.5792 |

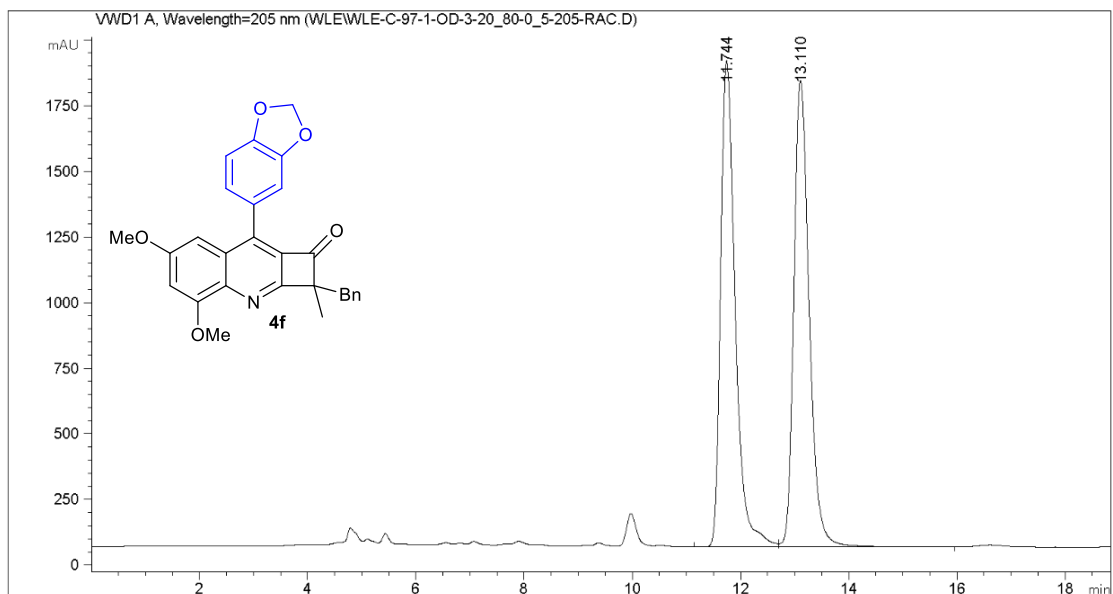

| No. | Ret. Time [min] | Type | Width [min] | Area [mAU*s] | Height [mAU] | Area %  |
|-----|-----------------|------|-------------|--------------|--------------|---------|
| 1   | 11.744          | BV   | 0.2858      | 3.47253e4    | 1851.48242   | 49.8214 |
| 2   | 13.110          | VB   | 0.3027      | 3.49742e4    | 1776.44971   | 50.1786 |

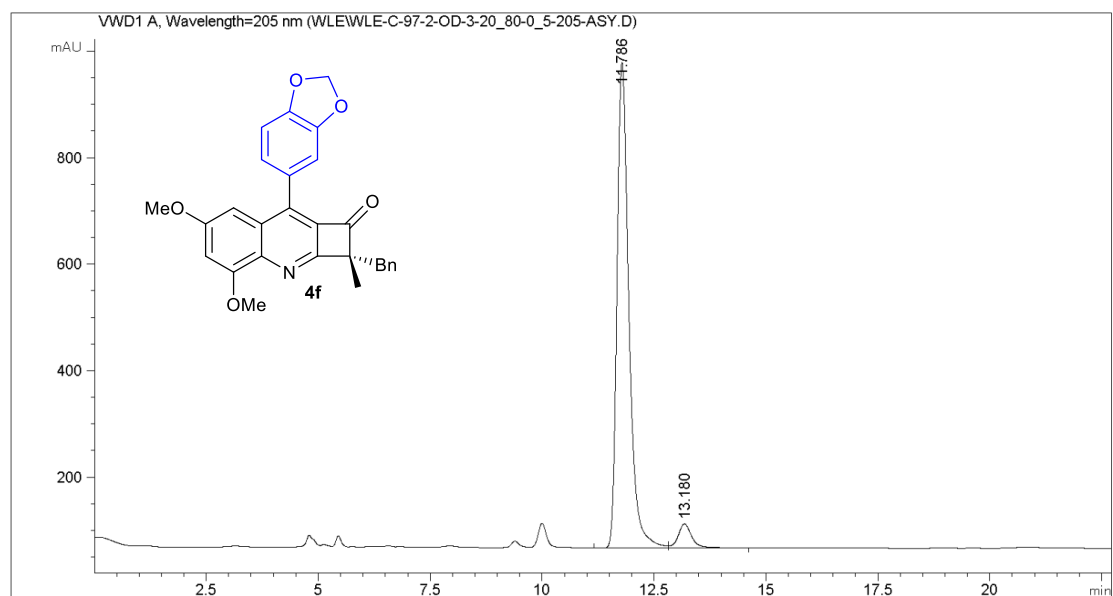

| No. | Ret. Time [min] | Type | Width [min] | Area [mAU*s] | Height [mAU] | Area %  |
|-----|-----------------|------|-------------|--------------|--------------|---------|
| 1   | 11.786          | BV   | 0.2785      | 1.67652e4    | 911.68103    | 94.6268 |
| 2   | 13.180          | VB   | 0.3172      | 951.98303    | 45.28869     | 5.3732  |

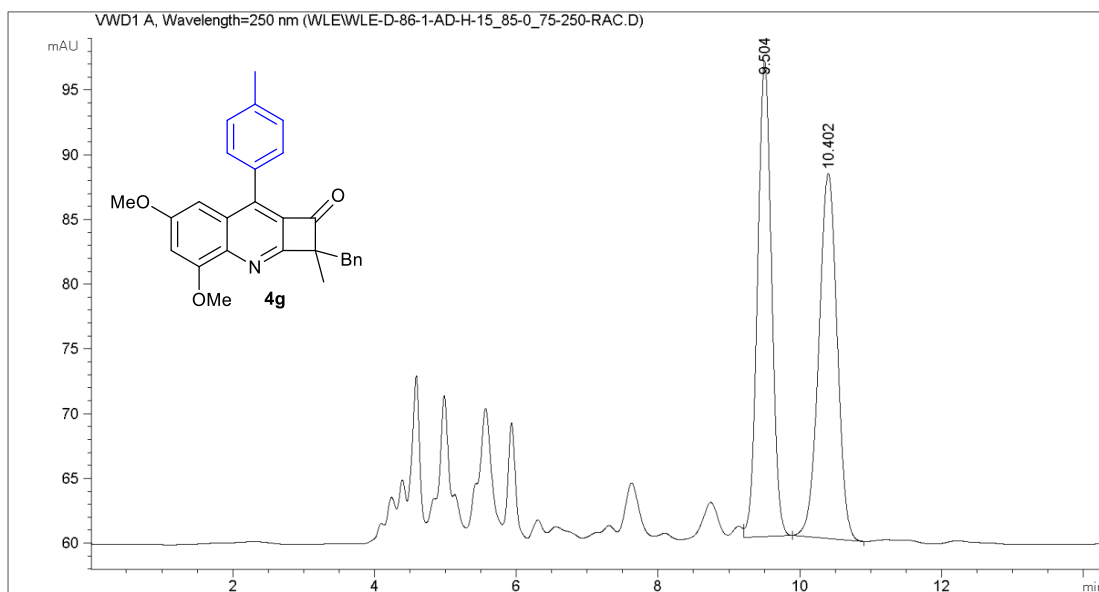

| No. | Ret. Time [min] | Type | Width [min] | Area [mAU*s] | Height [mAU] | Area %  |
|-----|-----------------|------|-------------|--------------|--------------|---------|
| 1   | 9.504           | VB   | 0.2129      | 502.72849    | 36.68983     | 49.8052 |
| 2   | 10.402          | BB   | 0.2797      | 506.66010    | 28.18185     | 50.1948 |

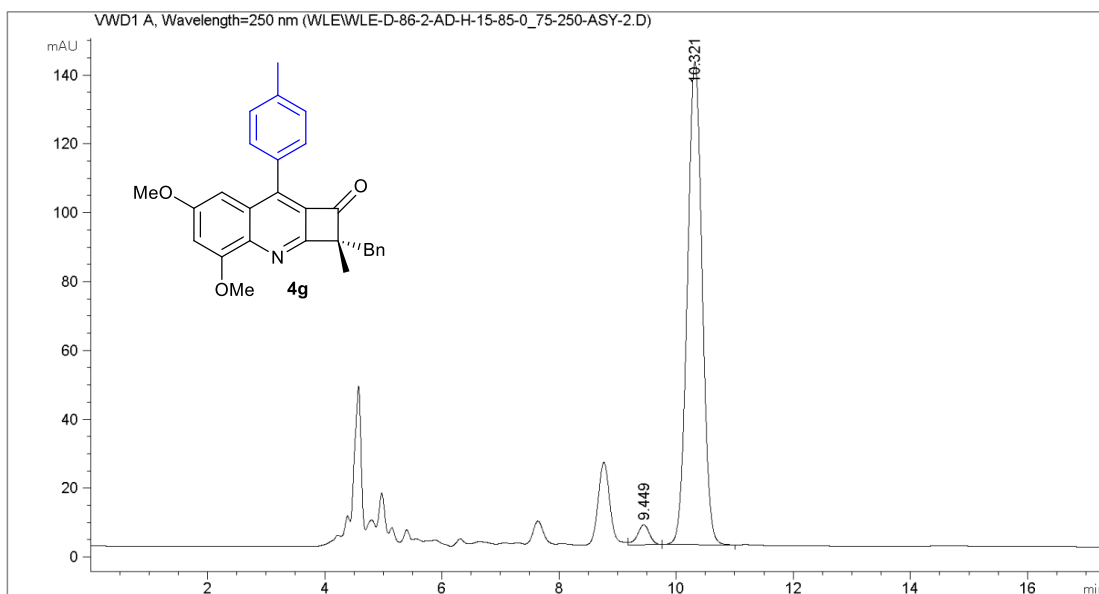

| No. | Ret. Time [min] | Type | Width [min] | Area [mAU*s] | Height [mAU] | Area %  |
|-----|-----------------|------|-------------|--------------|--------------|---------|
| 1   | 9.449           | VB   | 0.2174      | 82.38947     | 5.81208      | 3.2456  |
| 2   | 10.321          | BB   | 0.2732      | 2456.08789   | 140.34109    | 96.7544 |

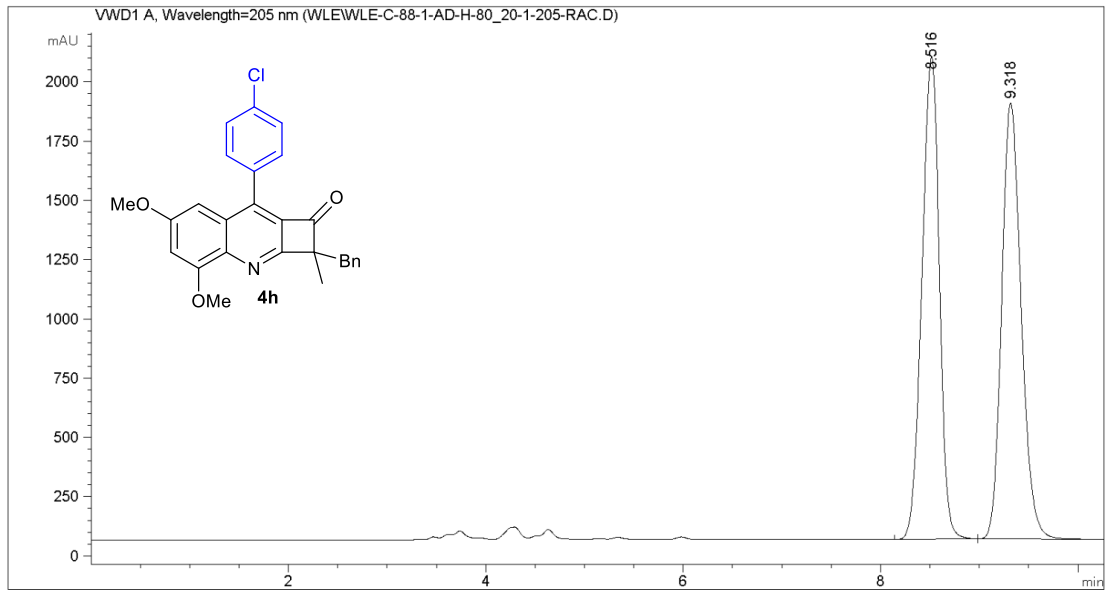

| No. | Ret. Time [min] | Type | Width [min] | Area [mAU*s] | Height [mAU] | Area %  |
|-----|-----------------|------|-------------|--------------|--------------|---------|
| 1   | 8.516           | BB   | 0.1922      | 2.50142e4    | 2038.53149   | 49.7220 |
| 2   | 9.318           | BBA  | 0.2124      | 2.52939e4    | 1839.36304   | 50.2780 |

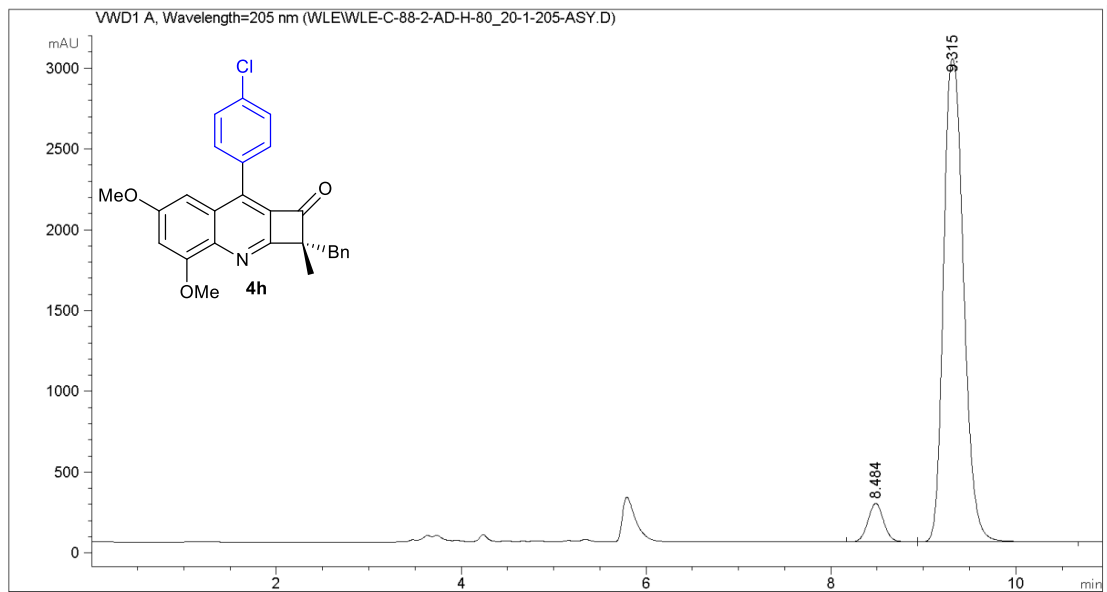

| No. | Ret. Time [min] | Type | Width [min] | Area [mAU*s] | Height [mAU] | Area %  |
|-----|-----------------|------|-------------|--------------|--------------|---------|
| 1   | 8.484           | VB   | 0.1827      | 2816.00439   | 238.62781    | 5.8956  |
| 2   | 9.315           | BB   | 0.2354      | 4.49483e4    | 2989.49365   | 94.1044 |

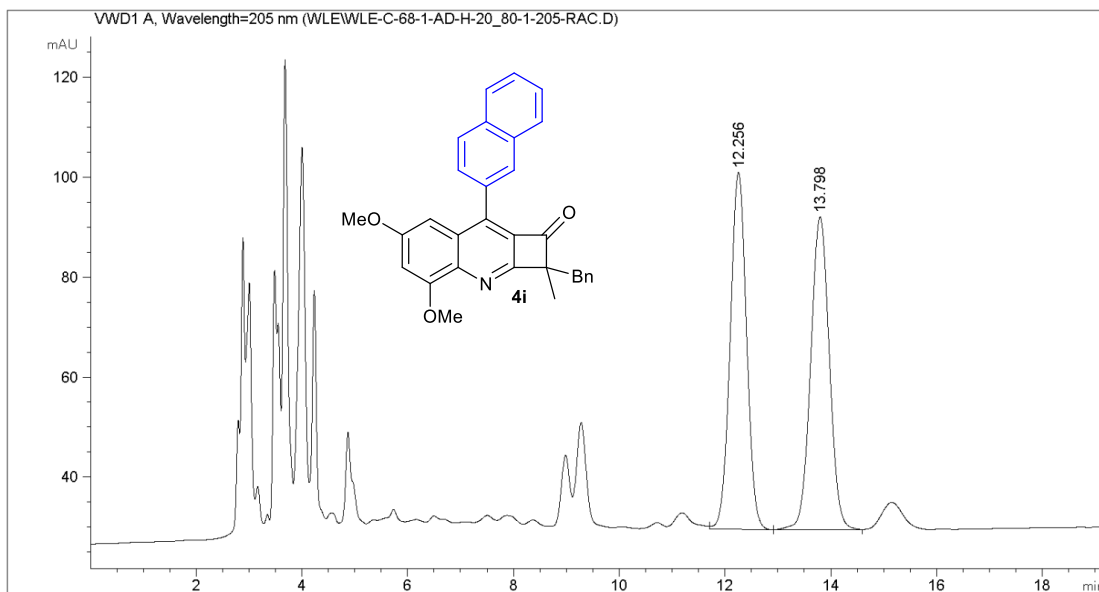

| No. | Ret. Time [min] | Type | Width [min] | Area [mAU*s] | Height [mAU] | Area %  |
|-----|-----------------|------|-------------|--------------|--------------|---------|
| 1   | 12.256          | VB   | 0.3347      | 1535.12598   | 71.43362     | 49.9792 |
| 2   | 13.798          | BB   | 0.3817      | 1536.40503   | 62.52917     | 50.0208 |

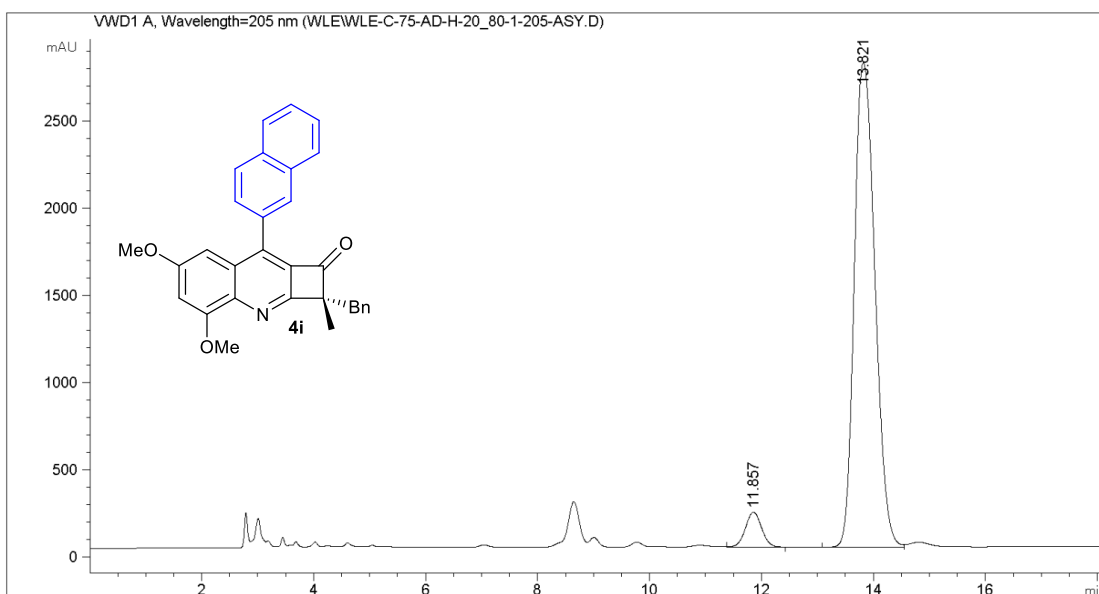

| No. | Ret. Time [min] | Type | Width [min] | Area [mAU*s] | Height [mAU] | Area %  |
|-----|-----------------|------|-------------|--------------|--------------|---------|
| 1   | 11.857          | VV   | 0.3130      | 4047.57983   | 200.92456    | 5.3861  |
| 2   | 13.821          | BV   | 0.4014      | 7.11004e4    | 2780.26855   | 94.6139 |

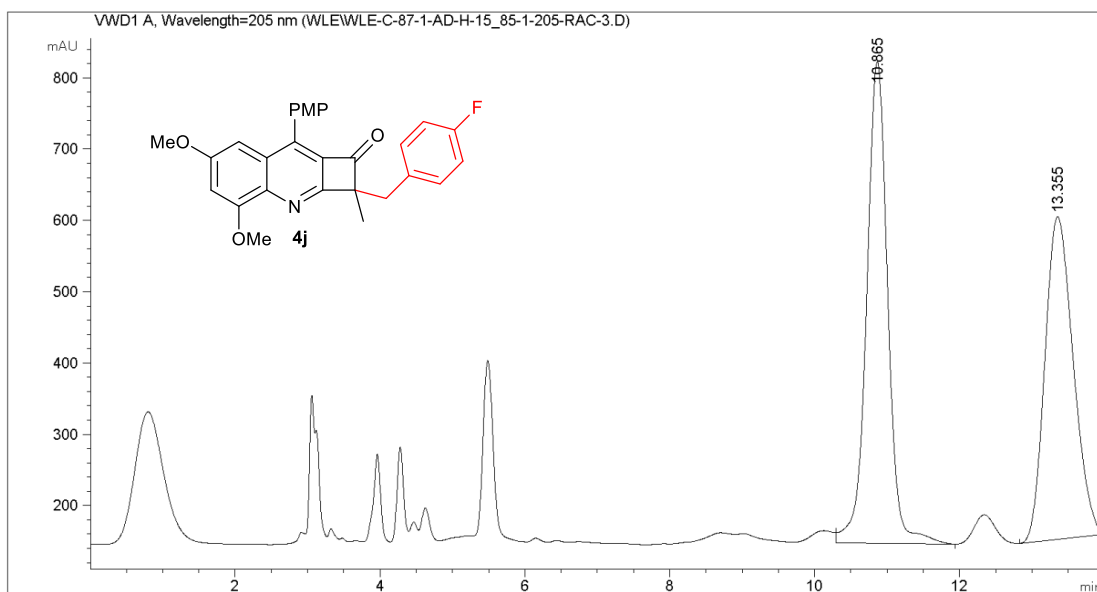

| No. | Ret. Time [min] | Type | Width [min] | Area [mAU*s] | Height [mAU] | Area %  |
|-----|-----------------|------|-------------|--------------|--------------|---------|
| 1   | 10.865          | VB   | 0.3093      | 1.36814e4    | 675.58118    | 52.7814 |
| 2   | 13.355          | BBA  | 0.4206      | 1.22394e4    | 452.42776    | 47.2186 |

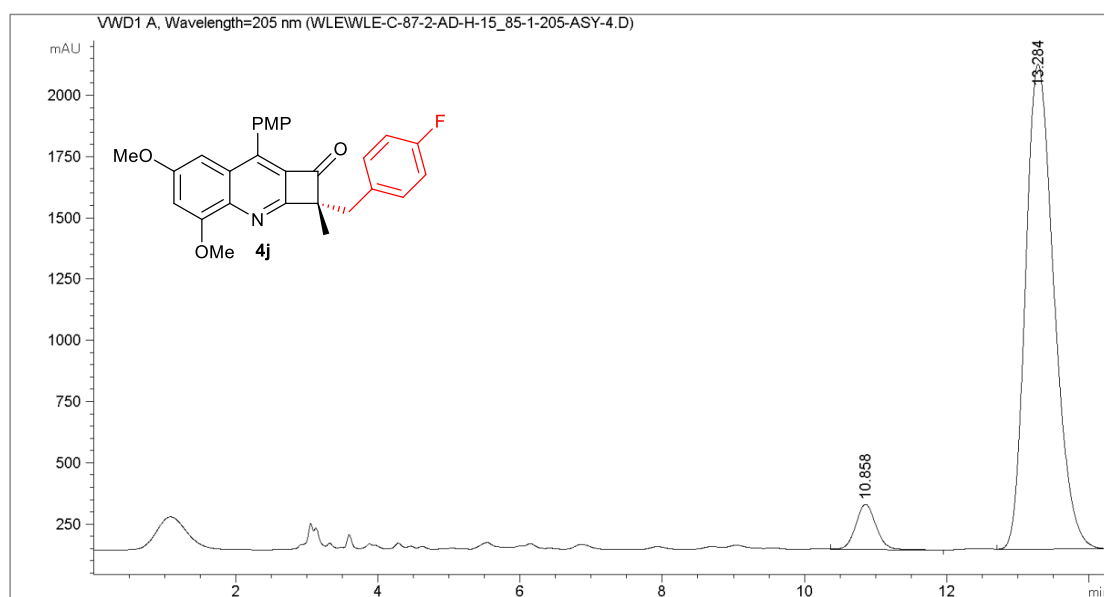

| No. | Ret. Time [min] | Type | Width [min] | Area [mAU*s] | Height [mAU] | Area %  |
|-----|-----------------|------|-------------|--------------|--------------|---------|
| 1   | 10.858          | VB   | 0.3079      | 3689.60352   | 184.84261    | 6.2949  |
| 2   | 13.284          | VBA  | 0.4296      | 5.49234e4    | 1980.27686   | 93.7051 |

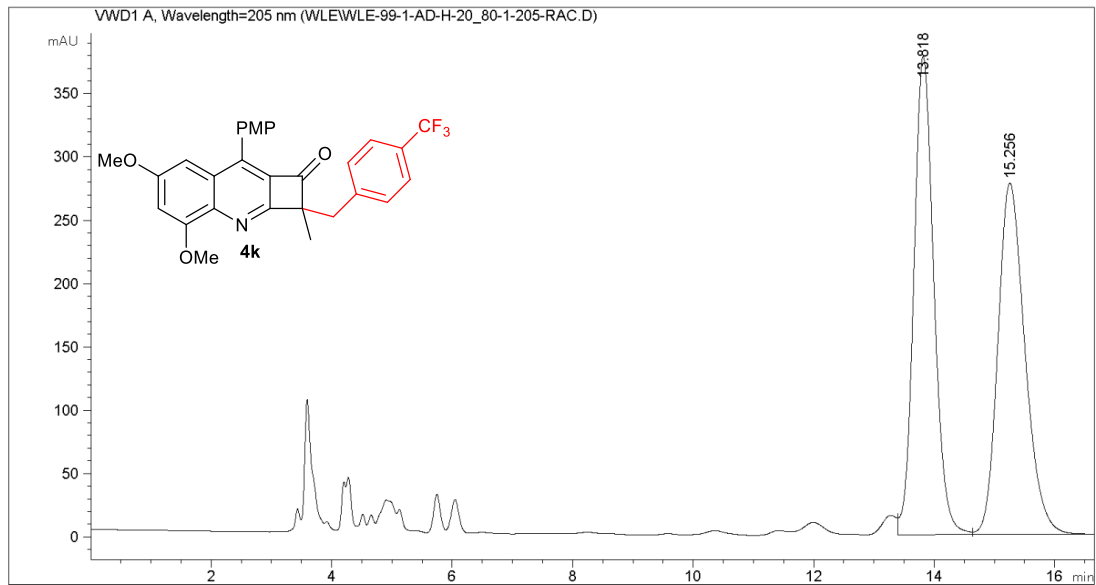

| No. | Ret. Time [min] | Type | Width [min] | Area [mAU*s] | Height [mAU] | Area %  |
|-----|-----------------|------|-------------|--------------|--------------|---------|
| 1   | 13.818          | VV   | 0.3564      | 8721.87891   | 377.71152    | 50.2257 |
| 2   | 15.256          | VBA  | 0.4773      | 8643.49609   | 277.54532    | 49.7743 |

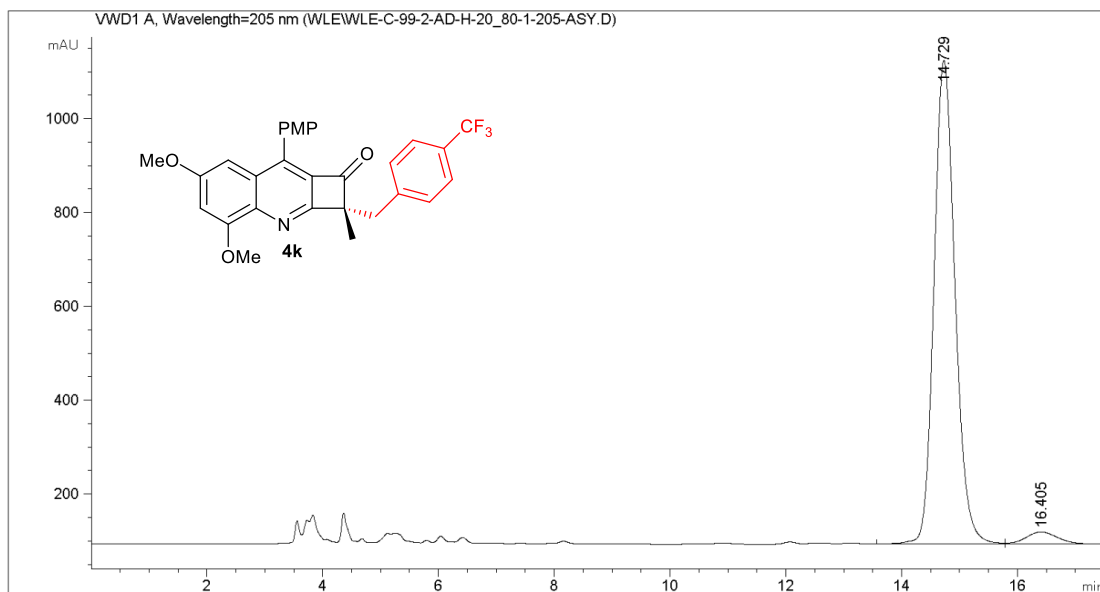

| No. | Ret. Time [min] | Type | Width [min] | Area [mAU*s] | Height [mAU] | Area %  |
|-----|-----------------|------|-------------|--------------|--------------|---------|
| 1   | 14.729          | BV   | 0.3894      | 2.60117e4    | 1030.92615   | 96.3849 |
| 2   | 16.405          | VBA  | 0.5791      | 975.61224    | 25.86177     | 3.6151  |



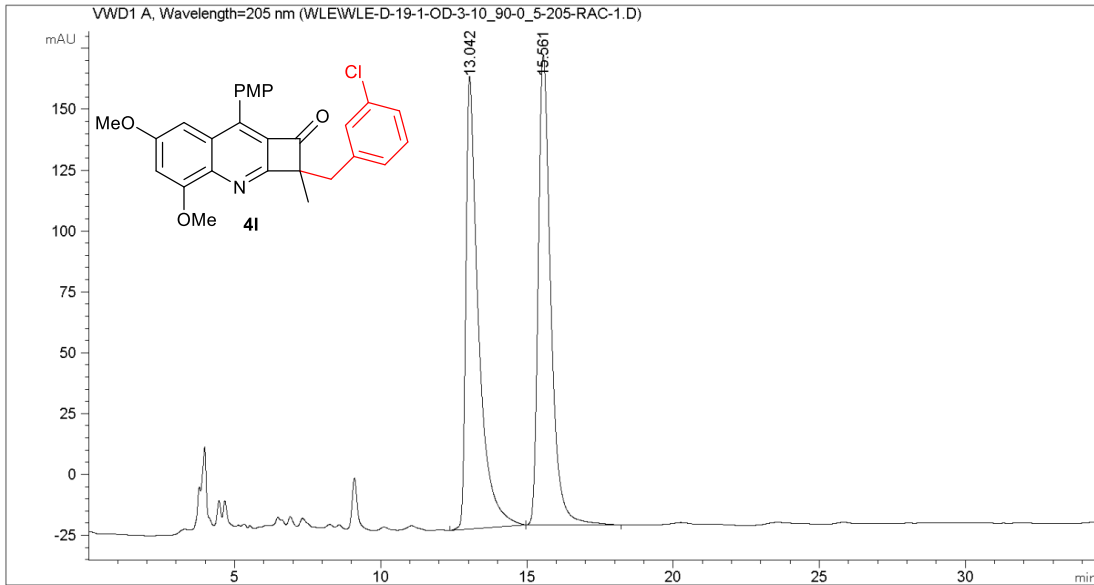

| No. | Ret. Time [min] | Type | Width [min] | Area [mAU*s] | Height [mAU] | Area %  |
|-----|-----------------|------|-------------|--------------|--------------|---------|
| 1   | 13.042          | BB   | 0.4284      | 5566.97266   | 185.87175    | 49.2288 |
| 2   | 15.561          | BB   | 0.4508      | 5741.39746   | 193.16600    | 50.7712 |

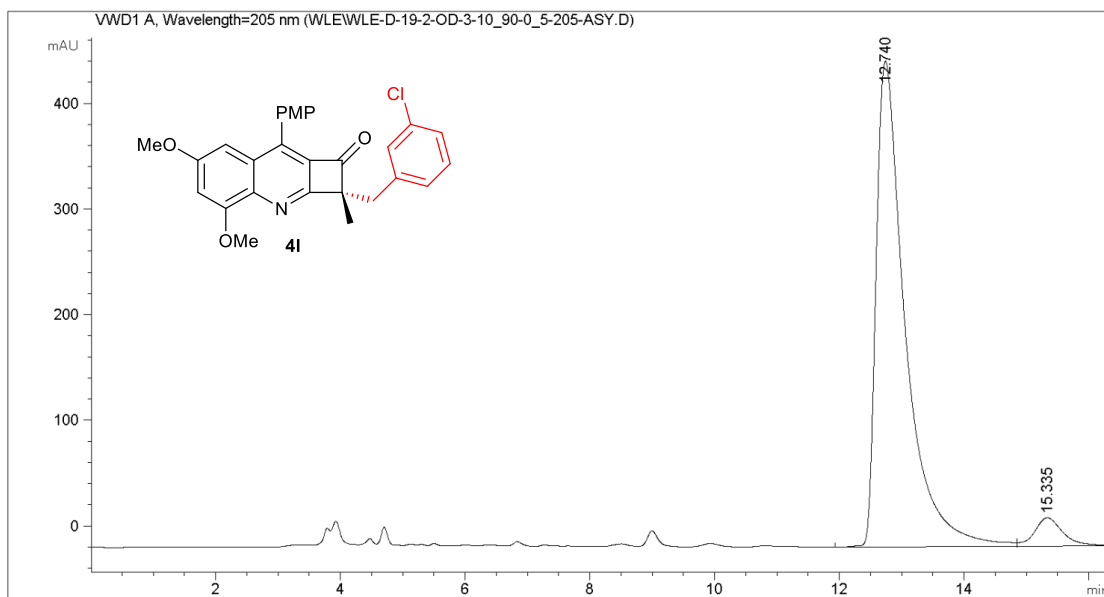

| No. | Ret. Time [min] | Type | Width [min] | Area [mAU*s] | Height [mAU] | Area %  |
|-----|-----------------|------|-------------|--------------|--------------|---------|
| 1   | 12.740          | BV   | 0.4795      | 1.48836e4    | 459.92599    | 94.7682 |
| 2   | 15.335          | VBA  | 0.4642      | 821.67438    | 26.53792     | 5.2318  |

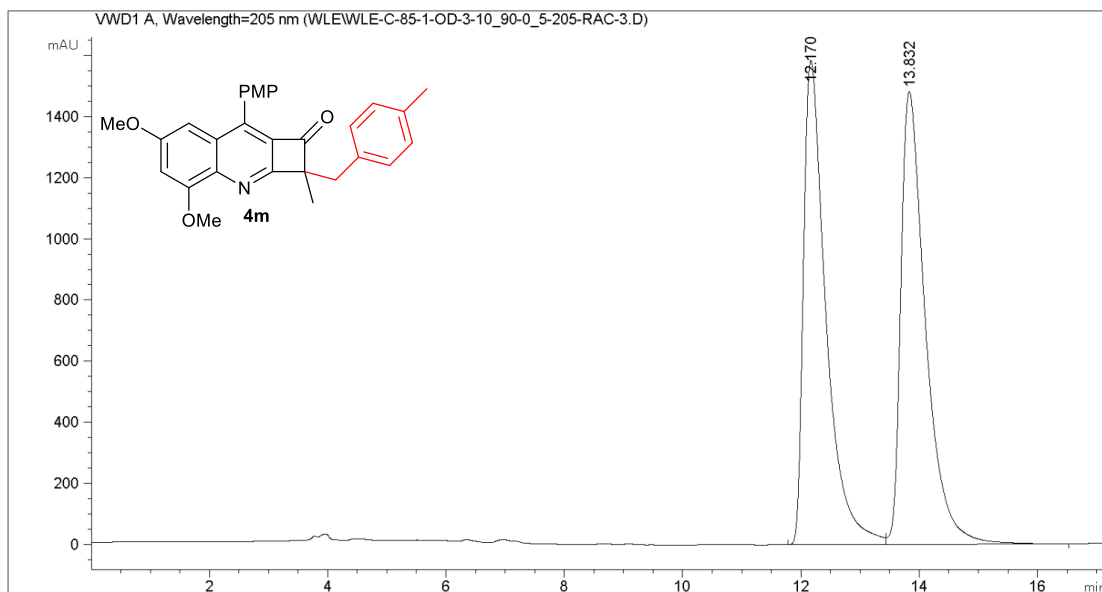

| No. | Ret. Time [min] | Type | Width [min] | Area [mAU*s] | Height [mAU] | Area %  |
|-----|-----------------|------|-------------|--------------|--------------|---------|
| 1   | 12.170          | BV   | 0.3918      | 4.18152e4    | 1585.16211   | 49.3320 |
| 2   | 13.832          | VB   | 0.4320      | 4.29476e4    | 1482.59155   | 50.6680 |

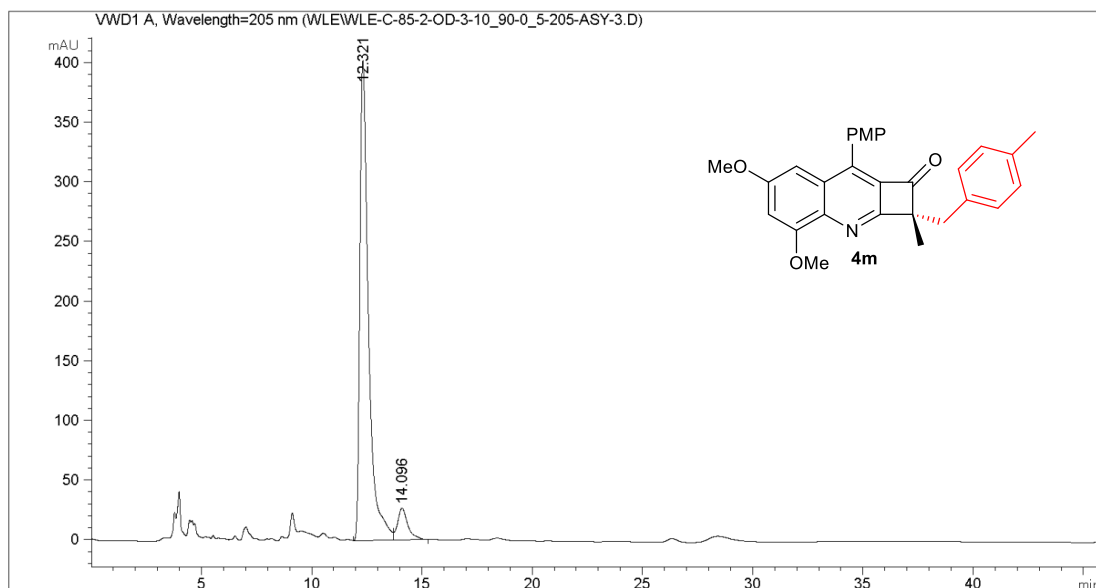

| No. | Ret. Time [min] | Type | Width [min] | Area [mAU*s] | Height [mAU] | Area %  |
|-----|-----------------|------|-------------|--------------|--------------|---------|
| 1   | 12.321          | BV   | 0.4059      | 1.09570e4    | 402.14716    | 92.6417 |
| 2   | 14.096          | VB   | 0.4793      | 870.29291    | 26.76643     | 7.3583  |

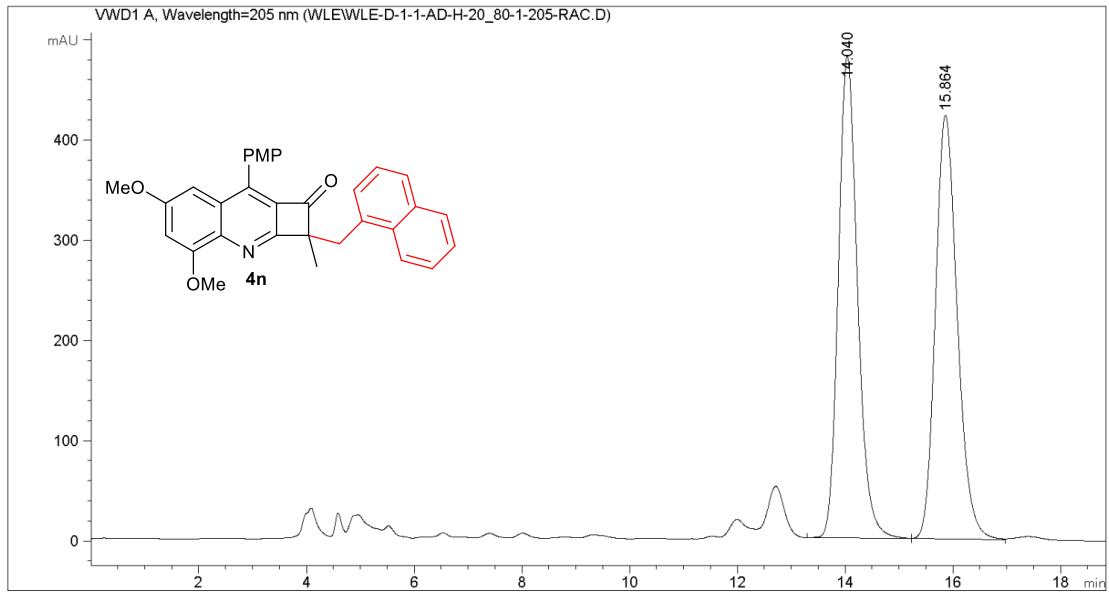

| No. | Ret. Time [min] | Type | Width [min] | Area [mAU*s] | Height [mAU] | Area %  |
|-----|-----------------|------|-------------|--------------|--------------|---------|
| 1   | 14.040          | BB   | 0.3806      | 1.18889e4    | 480.57648    | 49.9313 |
| 2   | 15.864          | BV   | 0.4352      | 1.19216e4    | 422.45511    | 50.0687 |

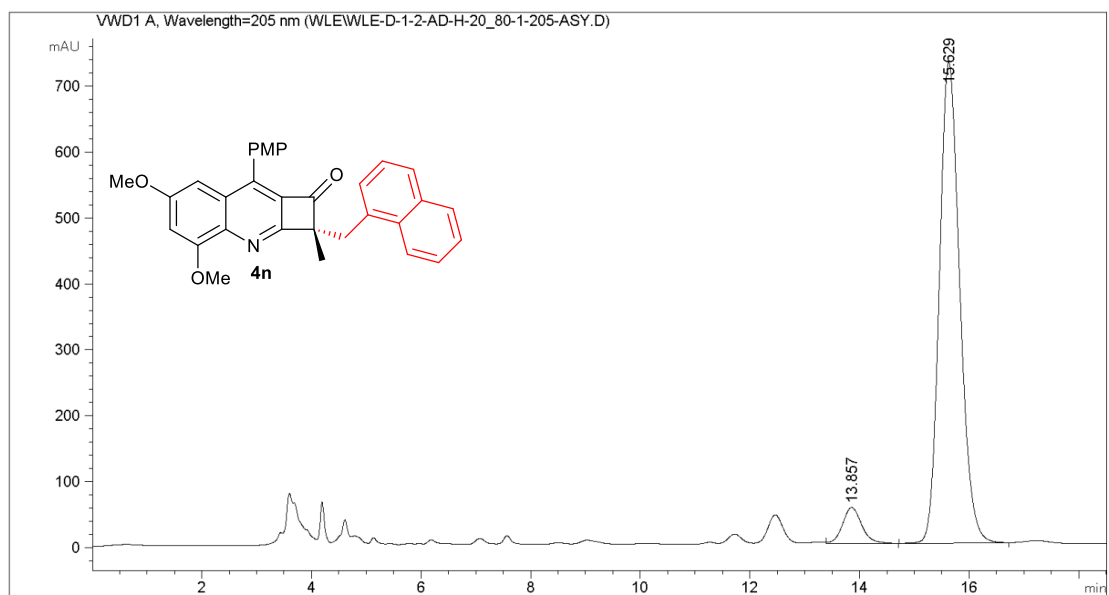

| No. | Ret. Time [min] | Type | Width [min] | Area [mAU*s] | Height [mAU] | Area %  |
|-----|-----------------|------|-------------|--------------|--------------|---------|
| 1   | 13.857          | VB   | 0.3715      | 1323.14063   | 54.64806     | 6.5572  |
| 2   | 15.629          | BB   | 0.3993      | 1.88554e4    | 730.16913    | 93.4428 |

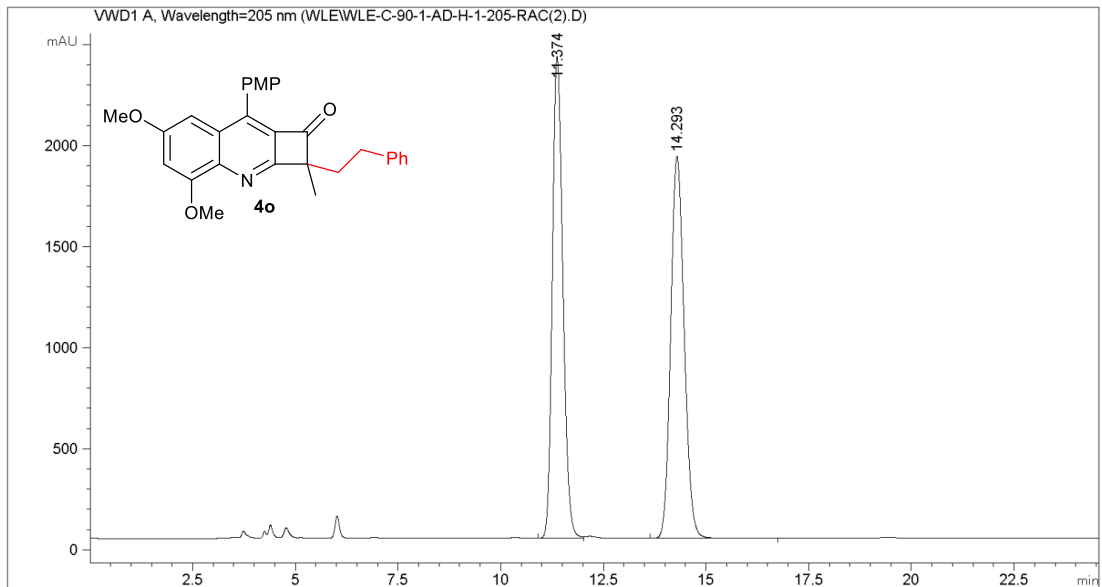

| No. | Ret. Time [min] | Type | Width [min] | Area [mAU*s] | Height [mAU] | Area %  |
|-----|-----------------|------|-------------|--------------|--------------|---------|
| 1   | 11.374          | BV   | 0.2778      | 4.24515e4    | 2383.16553   | 49.5962 |
| 2   | 14.293          | BB   | 0.3553      | 4.31427e4    | 1890.29260   | 50.4038 |

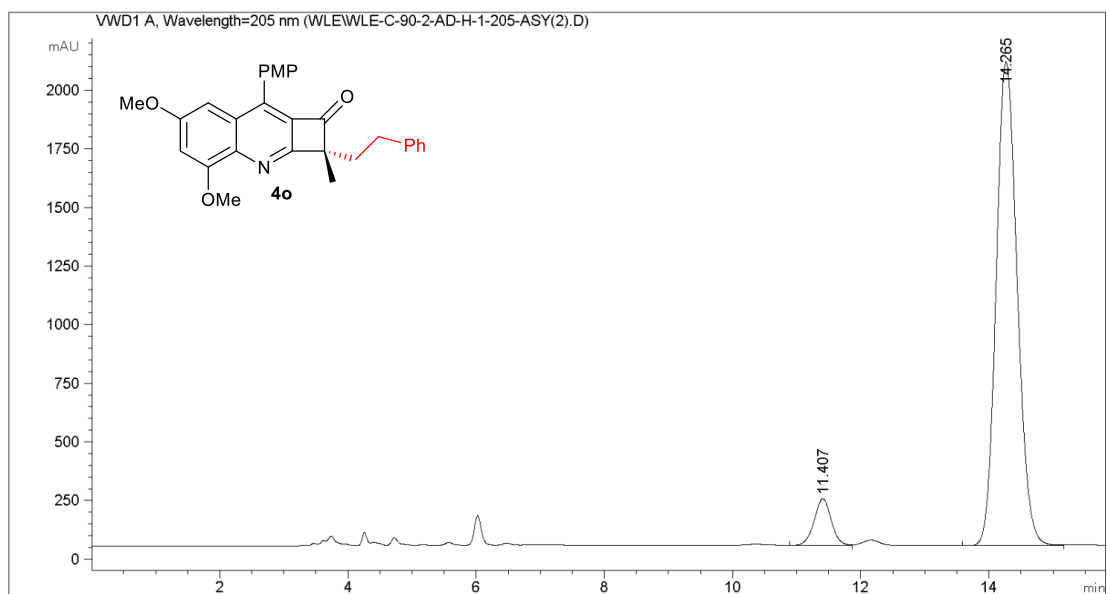

| No. | Ret. Time [min] | Type | Width [min] | Area [mAU*s] | Height [mAU] | Area %  |
|-----|-----------------|------|-------------|--------------|--------------|---------|
| 1   | 11.407          | BV   | 0.2835      | 3697.09790   | 199.25688    | 7.3000  |
| 2   | 14.265          | BV   | 0.3546      | 4.69483e4    | 2061.87524   | 92.7000 |

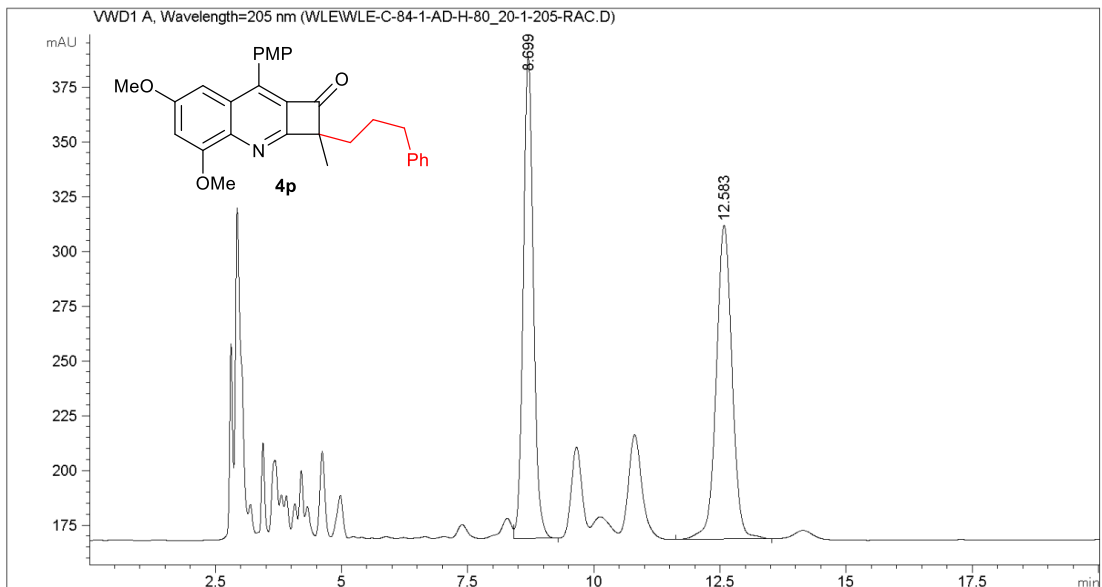

| No. | Ret. Time [min] | Type | Width [min] | Area [mAU*s] | Height [mAU] | Area %  |
|-----|-----------------|------|-------------|--------------|--------------|---------|
| 1   | 8.699           | VB   | 0.2162      | 3068.22388   | 219.37254    | 49.5035 |
| 2   | 12.583          | BB   | 0.3359      | 3129.76465   | 143.22482    | 50.4965 |

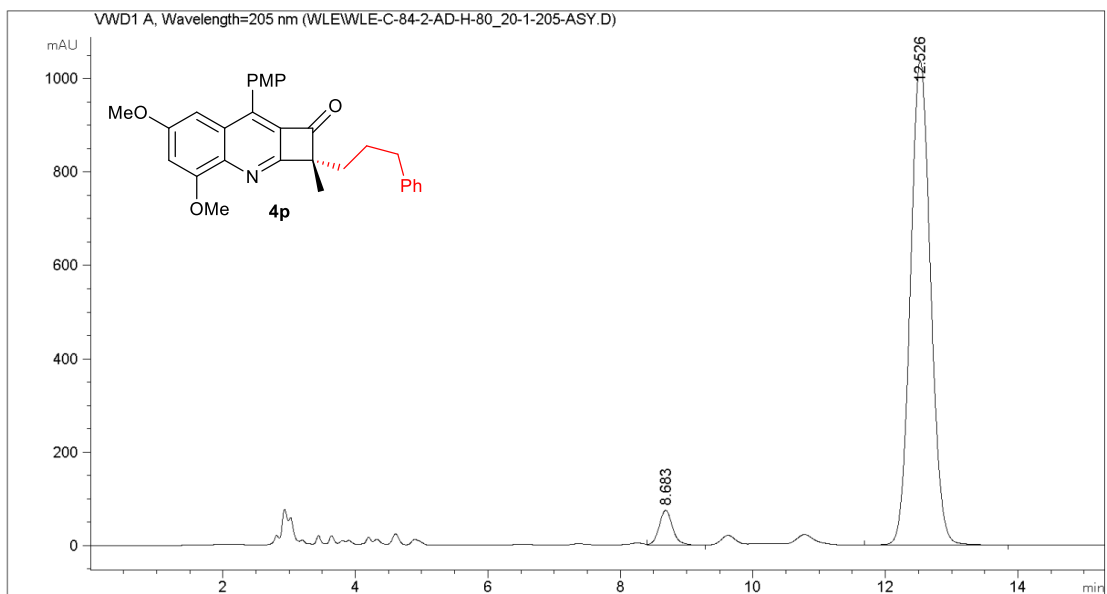

| No. | Ret. Time [min] | Type | Width [min] | Area [mAU*s] | Height [mAU] | Area %  |
|-----|-----------------|------|-------------|--------------|--------------|---------|
| 1   | 8.683           | VB   | 0.2169      | 1041.38989   | 74.13898     | 4.5396  |
| 2   | 12.526          | BB   | 0.3281      | 2.18989e4    | 1037.99890   | 95.4604 |

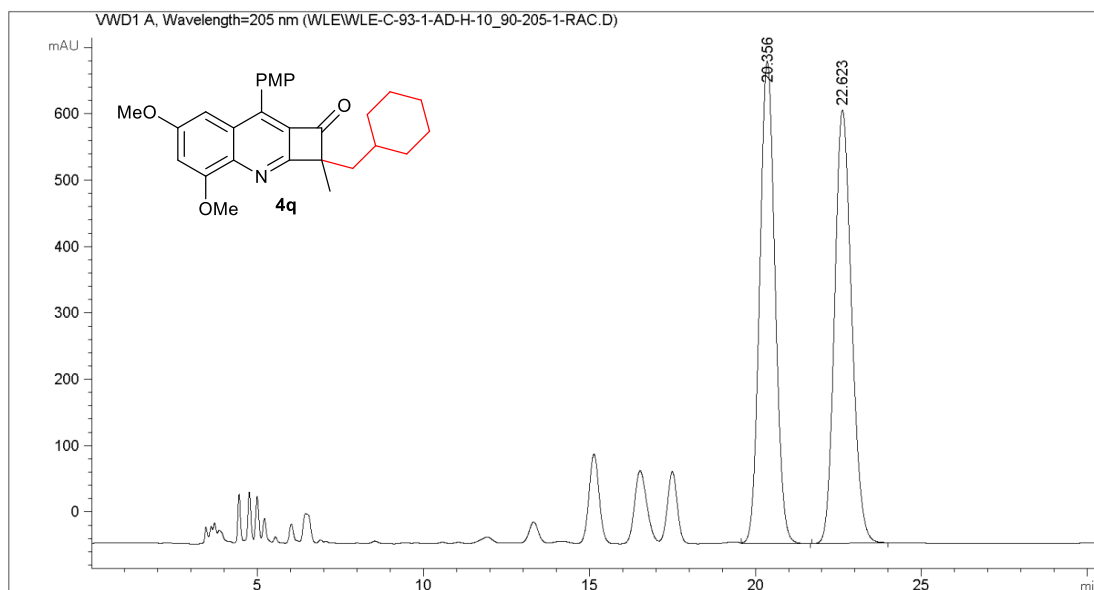

| No. | Ret. Time [min] | Type | Width [min] | Area [mAU*s] | Height [mAU] | Area %  |
|-----|-----------------|------|-------------|--------------|--------------|---------|
| 1   | 20.356          | VB   | 0.4990      | 2.33221e4    | 727.55328    | 50.0588 |
| 2   | 22.623          | BB   | 0.5505      | 2.32674e4    | 653.29877    | 49.9412 |

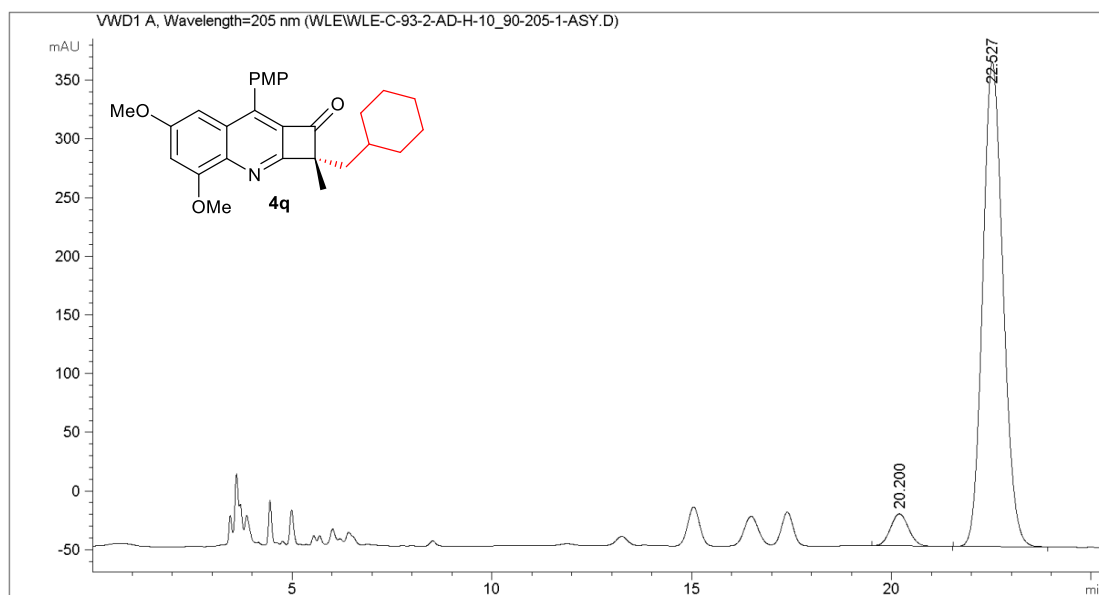

| No. | Ret. Time [min] | Type | Width [min] | Area [mAU*s] | Height [mAU] | Area %  |
|-----|-----------------|------|-------------|--------------|--------------|---------|
| 1   | 20.200          | BB   | 0.4930      | 861.54956    | 27.31194     | 5.5692  |
| 2   | 22.527          | BB   | 0.5487      | 1.46085e4    | 412.97748    | 94.4308 |

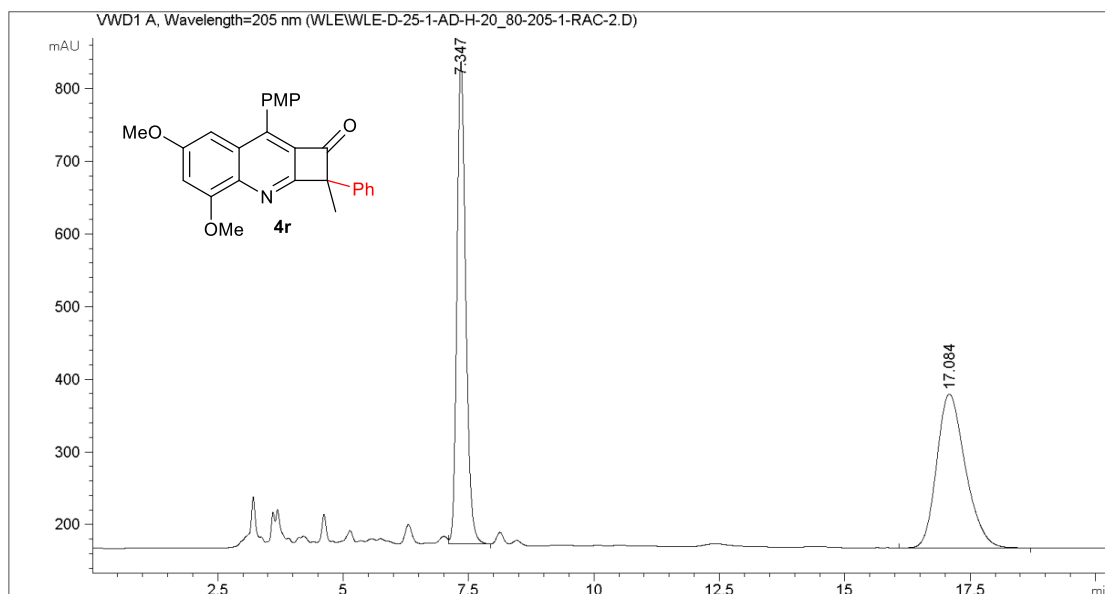

| No. | Ret. Time [min] | Type | Width [min] | Area [mAU*s] | Height [mAU] | Area %  |
|-----|-----------------|------|-------------|--------------|--------------|---------|
| 1   | 7.347           | VB   | 0.1869      | 8071.18652   | 663.78351    | 49.0603 |
| 2   | 17.084          | BB   | 0.6059      | 8380.38965   | 211.67906    | 50.9397 |

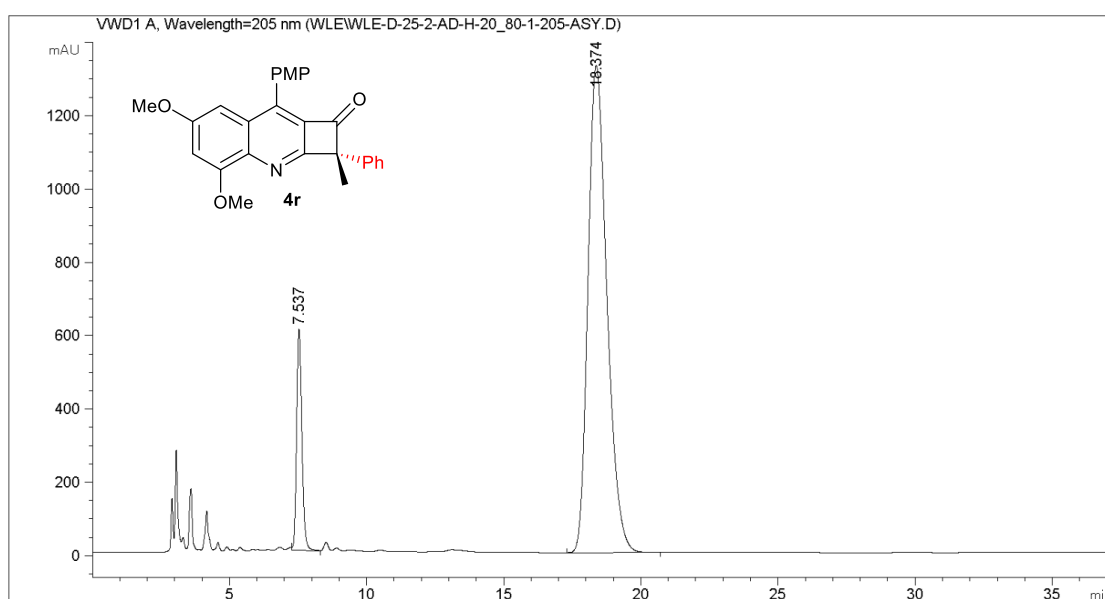

| No. | Ret. Time [min] | Type | Width [min] | Area [mAU*s] | Height [mAU] | Area %  |
|-----|-----------------|------|-------------|--------------|--------------|---------|
| 1   | 7.537           | VB   | 0.2049      | 8058.68311   | 602.98492    | 11.2594 |
| 2   | 18.374          | BB   | 0.7329      | 6.35141e4    | 1328.10400   | 88.7406 |

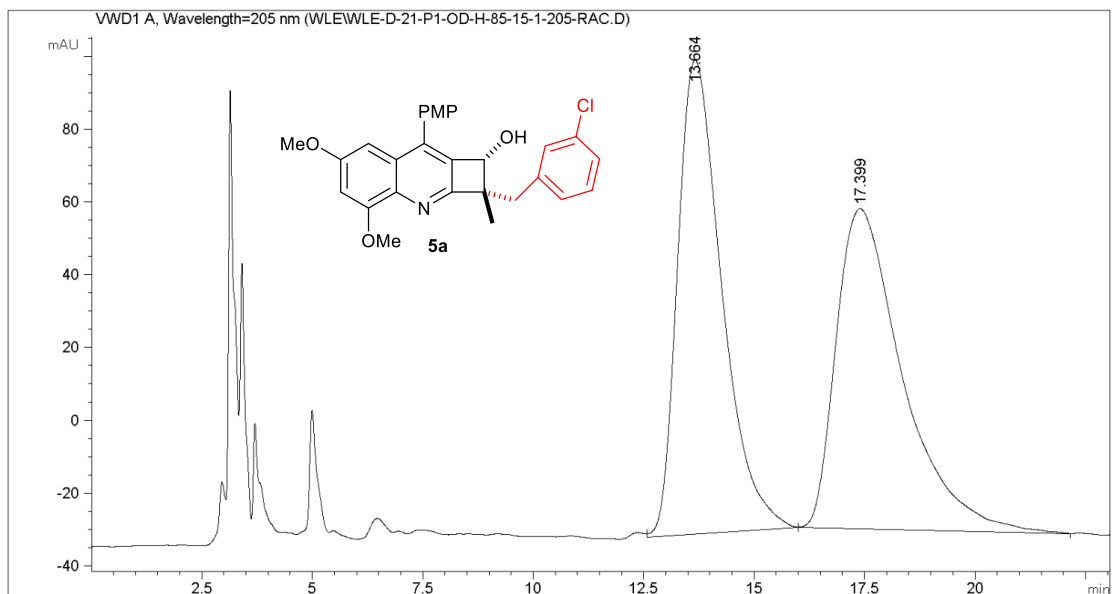

| No. | Ret. Time [min] | Type | Width [min] | Area [mAU*s] | Height [mAU] | Area %  |
|-----|-----------------|------|-------------|--------------|--------------|---------|
| 1   | 13.664          | VB   | 1.0584      | 9041.19629   | 130.16530    | 49.7591 |
| 2   | 17.399          | BB   | 1.5667      | 9128.75000   | 87.89259     | 50.2409 |

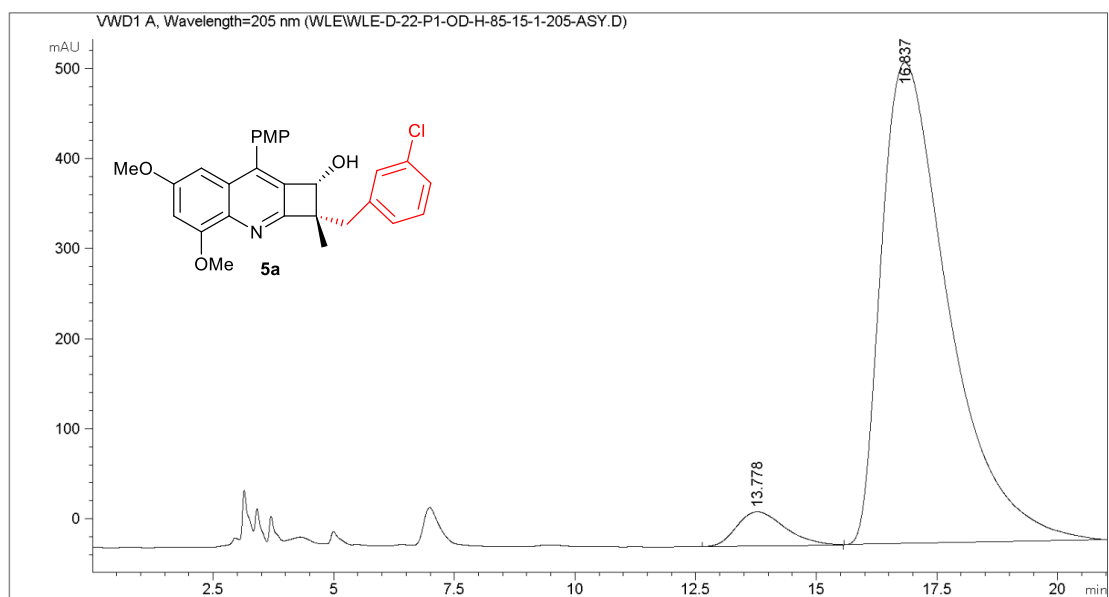

| No. | Ret. Time [min] | Type | Width [min] | Area [mAU*s] | Height [mAU] | Area %  |
|-----|-----------------|------|-------------|--------------|--------------|---------|
| 1   | 13.778          | BB   | 1.0712      | 2611.14746   | 37.83109     | 4.8014  |
| 2   | 16.837          | BBA  | 1.4707      | 5.17720e4    | 534.20831    | 95.1986 |



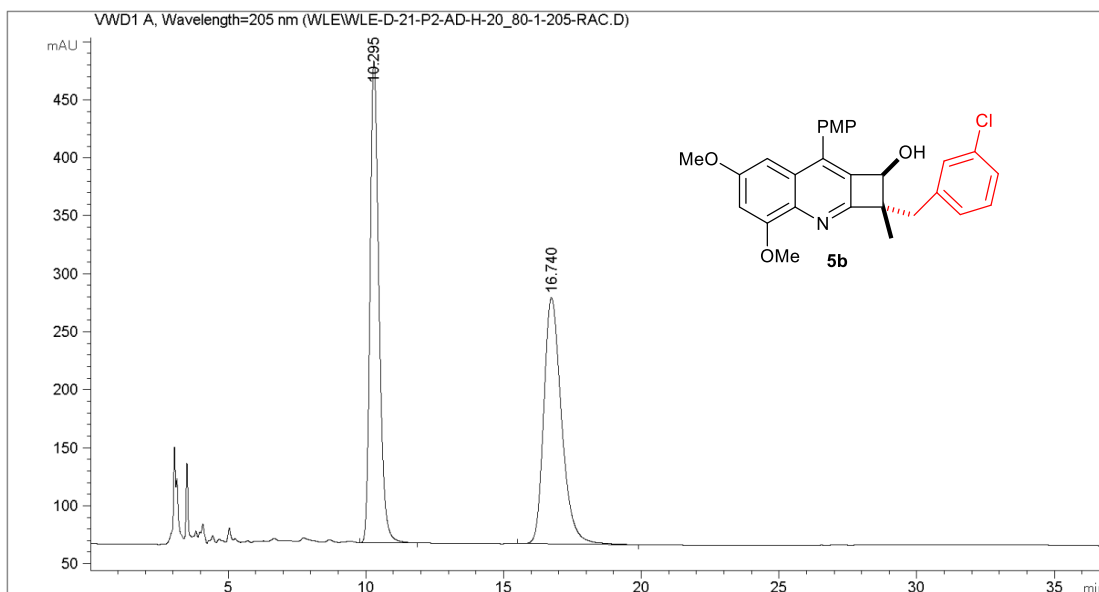

| No. | Ret. Time [min] | Type | Width [min] | Area [mAU*s] | Height [mAU] | Area %  |
|-----|-----------------|------|-------------|--------------|--------------|---------|
| 1   | 10.295          | BB   | 0.3452      | 9373.14648   | 415.45020    | 49.6079 |
| 2   | 16.740          | BB   | 0.6857      | 9521.29785   | 212.51022    | 50.3921 |

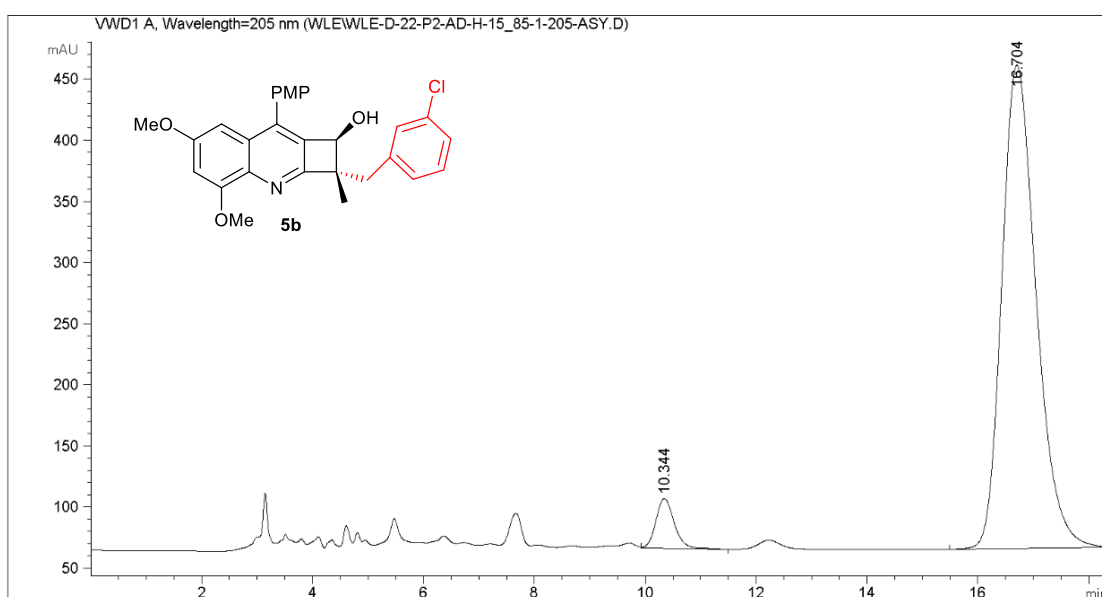

| No. | Ret. Time [min] | Type | Width [min] | Area [mAU*s] | Height [mAU] | Area %  |
|-----|-----------------|------|-------------|--------------|--------------|---------|
| 1   | 10.344          | VB   | 0.3522      | 939.66241    | 40.87000     | 5.2607  |
| 2   | 16.704          | BBA  | 0.6586      | 1.69224e4    | 395.14832    | 94.7393 |
